# Supplementary material for: Patient-specific iPSC-derived cardiomyocytes reveal variable phenotypic severity of Brugada syndrome
Source: PubMed Central journal article supplement — eBioMedicine. 2023 Aug 4;95:104741. doi: 10.1016/j.ebiom.2023.104741 (PMC10427992; doi:10.1016/j.ebiom.2023.104741), 2023-08-04

# Cell Line Authentication Service

## STR Profile Report

司法鉴定  
检验检测专用章

**The Query Sample ID:** 2023-4014-HEK-293  
**Sample Submitted By:** Xiaochen Wang  
**Institution:** Zhejiang University  
**Cell Line Designation:** HEK293(CVCL\_0045)  
**Date Sample Received:** Jul.12<sup>th</sup>, 2023  
**Report Date:** Jul.18<sup>th</sup>, 2023

### Methods:

Twenty one short tandem repeat (STR) loci plus the gender locus, Amelogenin, were amplified using the commercially available EX22 Kit from AGCU. The cell line sample was processed using the ABI Prism<sup>®</sup> 3500 Genetic Analyzer. Data were analyzed using GeneMapper<sup>®</sup> ID-X software v1.6 (Applied Biosystems). Appropriate positive and negative controls were run and confirmed for the sample submitted. And the Query profile will be compared for match to STR reference profile from Cellosaurus.

**Results:**

| <b>STR Loci</b>                                   | <b>Query Profile:</b><br>2023-4014-HEK-293<br>(Submitted by Wang) | <b>Reference Profile:</b><br>HEK293<br>(Cellosaurus CVCL_0045) |
|---------------------------------------------------|-------------------------------------------------------------------|----------------------------------------------------------------|
| CSF1PO                                            | 12                                                                | 11,12                                                          |
| D3S1358                                           | 15,17                                                             | 15,17                                                          |
| D5S818                                            | 8                                                                 | 8,9                                                            |
| D7S820                                            | 11,12                                                             | 11,12                                                          |
| D8S1179                                           | 12,14                                                             | 12,14                                                          |
| D13S317                                           | 12,14                                                             | 12,14                                                          |
| D16S539                                           | 9,13                                                              | 9,13                                                           |
| D18S51                                            | 17,18                                                             | 17,18                                                          |
| D21S11                                            | 28,30.2                                                           | 28,30.2                                                        |
| FGA                                               | 23                                                                | 23                                                             |
| TH01                                              | 7,9.3                                                             | 7,9.3                                                          |
| TPOX                                              | 11                                                                | 11                                                             |
| vWA                                               | 16,19                                                             | 16,19                                                          |
| <b>Analysis of STR data</b>                       |                                                                   |                                                                |
|                                                   | <b>2023-4014-HEK-293</b>                                          | <b>HEK293</b>                                                  |
| Total Number of Distinct Alleles                  | 22                                                                | 24                                                             |
| Number of Distinct Alleles Shared by Both Samples | 22                                                                |                                                                |
| Match Algorithm                                   | $[(22 \times 2) / (22 + 24)] \times 100\%$                        |                                                                |
| Percent Match                                     | 96%                                                               |                                                                |

The allele match algorithm compares the 13 core loci only, even though alleles from all loci, including amelogenin locus, will be reported in the GeneMapper.

Note: These data and analysis are for research use only.

**Explanation:**

*ANSI/ATCC ASN-0002 Revised 2021 Authentication Of Human Cell*

*Lines: Standardization of Short Tandem Repeat (STR) Profiling*

recommends the use of a modified Tanabe Match algorithm:

$$\text{Tanabe \% Match} = \left[ \frac{2 \times (\text{N}^\circ \text{ of STR alleles shared between Query and Reference Profiles})}{(\text{N}^\circ \text{ of STR alleles in Query Profile}) + (\text{N}^\circ \text{ of STR alleles in Reference Profile})} \right] \times 100\%$$

In this Standard, count single peaks once. Count only the alleles at shared STR loci. The alleles at the amelogenin loci are excluded from this calculation.

Two samples are considered possibly related when their STR profiles match at 80-90% of alleles across the 13 core STR loci, as calculated using the matching algorithm. At matches of 90% or greater, the cell lines have very likely originated from the same donor. Samples between 60 and 79% match tend to be unrelated, but need may further investigation to confirm that they are unrelated.

Note: Percent matches of even 100% only indicate that the cell lines or tissue samples are derived from the same donor and do not mean the samples are genetically identical. STR analysis examines only a very small portion (< 0.0004%) of the entire genome.

**Summary:**

The Query STR profile: 2023-4014-HEK-293 (Submitted by Xiaochen Wang) and the Reference STR profile: HEK293 (Cellosaurus CVCL\_0045) have a Percent Match score of 96% by using the Tanabe algorithm to compare, which indicates that the cell lines have very likely originated from the same donor.

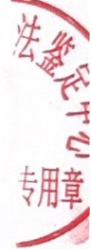

# Electrophoretogram:

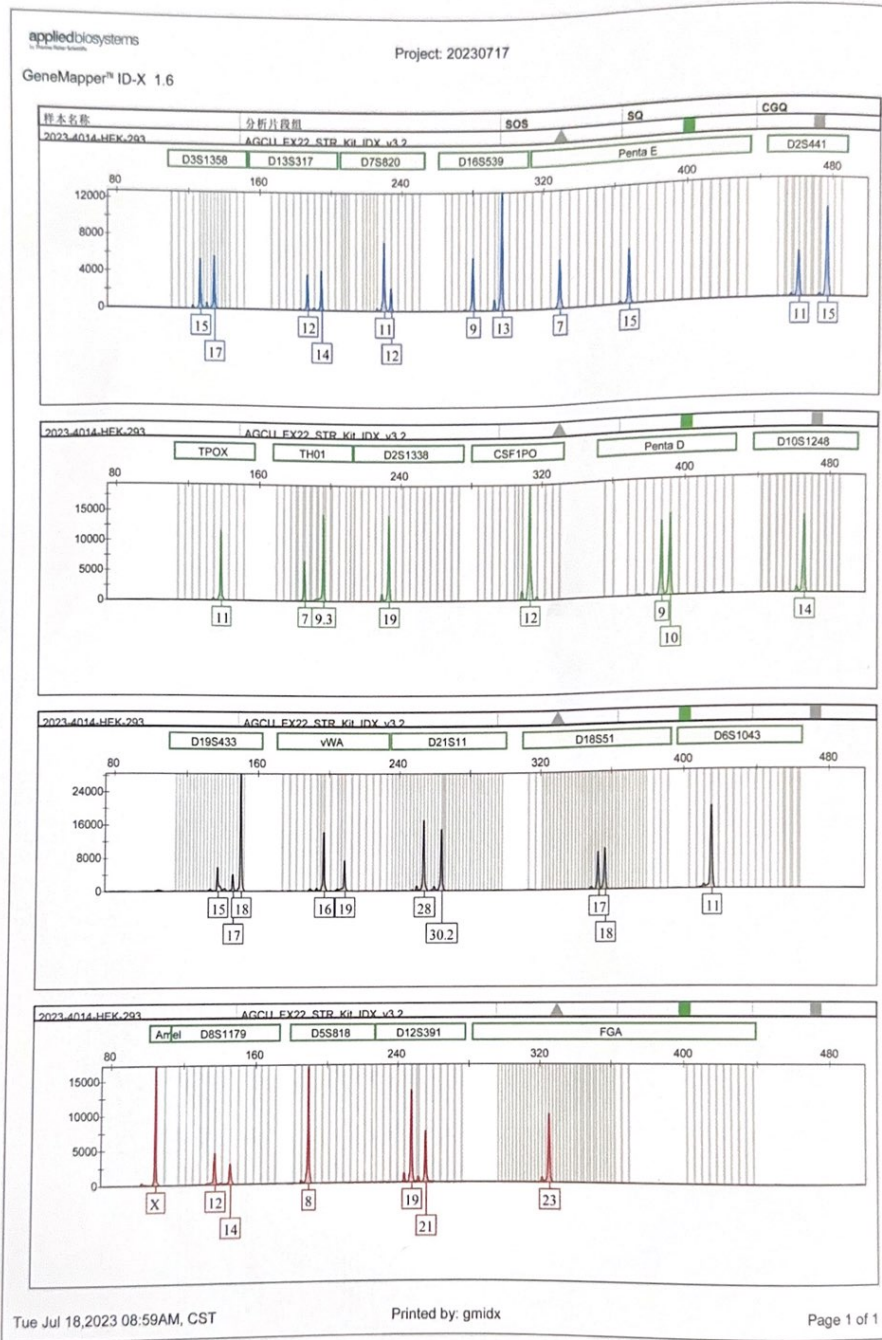

Supplement: mmc4.pdf [file mmc4.pdf]
