# Supplementary material for: Patient-specific iPSC-derived cardiomyocytes reveal variable phenotypic severity of Brugada syndrome
Source: PubMed Central journal article supplement — eBioMedicine. 2023 Aug 4;95:104741. doi: 10.1016/j.ebiom.2023.104741 (PMC10427992; doi:10.1016/j.ebiom.2023.104741), 2023-08-04

# Session Summary

Device: **Evera S VR DVBC3D1**

Serial Number:

Date of Visit: **23-Nov-2020 21:02:20**

Patient:

ID:

Physician:

## Device Information

Device Medtronic Evera S VR DVBC3D1 Implanted: 25-Apr-2016

## Device Status (Implanted: 25-Apr-2016)

Remaining Longevity Replace Device RRT (23-Nov-2020)  
(RRT on 22-Nov-2020)  
(based on initial interrogation)

### RV

### SVC

Pacing Impedance 475 ohms  
Defibrillation Impedance RV=48 ohms  
SVC=68 ohms  
Pace Polarity Bipolar  
Capture Threshold 0.875 V @ 0.40 ms  
Measured On 22-Nov-2020  
Programmed Amplitude/Pulse Width 2.00 V / 0.40 ms  
Measured R Wave 15.1 mV  
Programmed Sensitivity 0.30 mV

## Parameter Summary

Mode VVI Lower Rate 40 bpm

### Detection

VF On  
FVT OFF  
VT On

### Rates

>188 bpm  
154-188 bpm

### Therapies

ATP During Charging, 35J x 6  
All Rx Off  
Burst(3), Ramp(3), Ramp+(3), 35J x 3

Enhancements On: VT Monitor, Wavelet, High Rate Timeout, TWave, Noise(Timeout)

## Changes This Session

Session Start Current Value

No parameters have been changed during the current session.

# Rate Histograms

Device: **Evera S VR DVBC3D1**

Serial Number:

Date of Visit: **23-Nov-2020 21:02:20**

Patient:

ID:

Physician:

### Prior to Last Session

03-Sep-2020 to 23-Nov-2020

81 days

### Since Last Session

23-Nov-2020 to 23-Nov-2020

10 hours

% of Time

**VS** 100.0 %  
**VP** < 0.1%

100.0 %  
0.0 %

### Ventricular

% of Time

□ VS  
■ VP

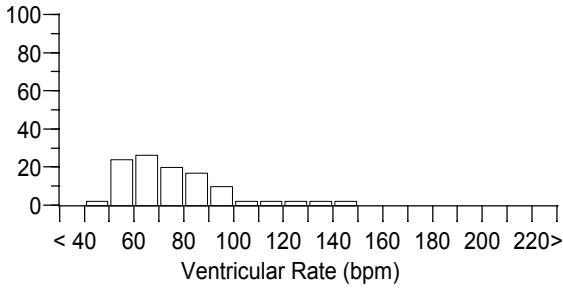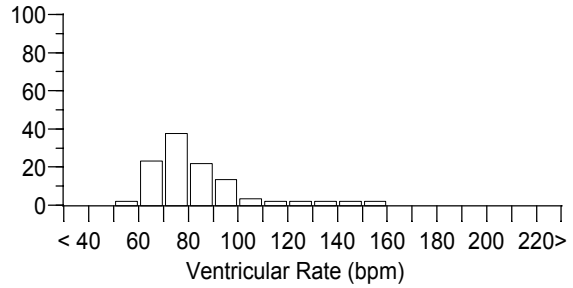

# Cardiac Compass Report

Device: **Evera S VR DVBC3D1**

Serial Number:

Date of Visit: **23-Nov-2020 21:02:20**

Patient:

ID:

Physician:

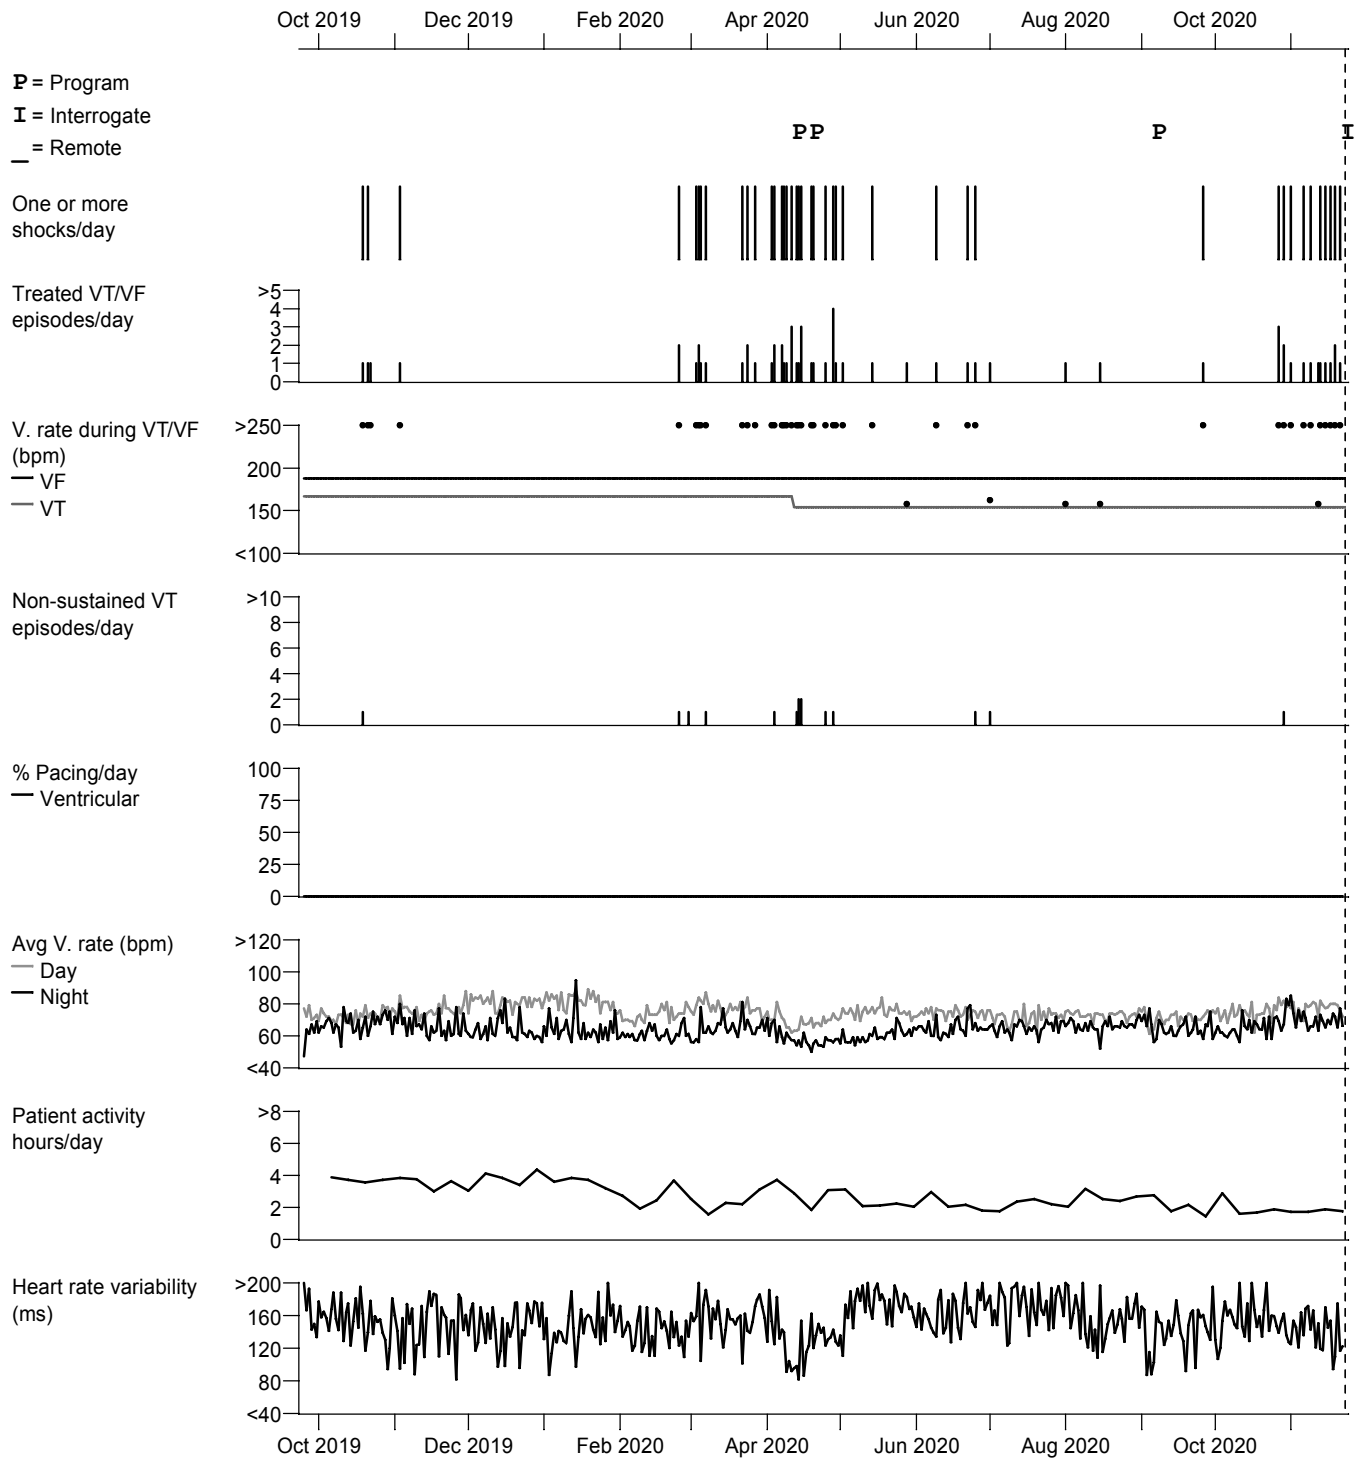

# VT/VF Counters

Device: **Evera S VR DVBC3D1**

Serial Number:

Date of Visit: **23-Nov-2020 21:02:20**

Patient:

ID:

Physician:

| Prior Session                 | Last Session                  | Device Lifetime                     |
|-------------------------------|-------------------------------|-------------------------------------|
| 03-Sep-2020 to<br>23-Nov-2020 | 23-Nov-2020 to<br>23-Nov-2020 | <b>Total</b><br>(Since 25-Apr-2016) |
| 81 days                       | 10 hours                      | 55 months                           |

### VT/VF Counters

| VT/VF Counters               | Prior Session | Last Session | Device Lifetime |
|------------------------------|---------------|--------------|-----------------|
| VF                           | 15            | 0 ↓          | 79              |
| FVT                          | 0             | 0            | 0               |
| VT                           | 1             | 0 ↓          | 27              |
| Monitored VT (133 - 154 bpm) | 22            | 0 ↓          |                 |
| VT-NS (>4 beats, >154 bpm)   | 1             | 0 ↓          |                 |
| High Rate-NS                 | 0             | 0            |                 |
| PVC Runs (2-4 beats)         | 3.2 per hour  | NA*          |                 |
| PVC Singles                  | 0.8 per hour  | NA*          |                 |
| Runs of VRS Paces            | 0.0 per hour  | NA*          |                 |
| Single VRS Paces             | 0.0 per hour  | NA*          |                 |

\*NA: Session duration less than 1 day.

### SVT: VT/VF Rx Withheld

|              |   |   |    |
|--------------|---|---|----|
| Wavelet      | 0 | 0 | 19 |
| V. Stability | 0 | 0 | 0  |
| Onset        | 0 | 0 | 0  |

### V. Oversensing: VT/VF Rx Withheld

|                      |   |   |   |
|----------------------|---|---|---|
| V. Oversensing-TWave | 0 | 0 | 0 |
| V. Oversensing-Noise | 0 | 0 | 0 |

### VT/VF Therapy Summary

|                    |          |   |          |
|--------------------|----------|---|----------|
| Pace-terminated    | 1 of 1   | 0 | 26 of 27 |
| Shock-terminated   | 15 of 15 | 0 | 79 of 79 |
| Total VT/VF Shocks | 15       | 0 | 79       |
| Aborted Charges    | 0        | 0 | 1        |

### VT/VF Therapy Efficacy Since Last Session 23-Nov-2020 to 23-Nov-2020

| VF Therapy | ATP+Chg | 35 J |
|------------|---------|------|------|------|------|------|------|
| Delivered  | 0       | 0    | 0    | 0    | 0    | 0    | 0    |
| Successful | 0       | 0    | 0    | 0    | 0    | 0    | 0    |

### FVT Therapy Off

| VT Therapy  | Burst | Ramp | Ramp+ | 35 J | 35 J | 35 J |
|-------------|-------|------|-------|------|------|------|
| Delivered   | 0     | 0    | 0     | 0    | 0    | 0    |
| Successful  | 0     | 0    | 0     | 0    | 0    | 0    |
| Accelerated | 0     | 0    | 0     | 0    | 0    | 0    |

# Arrhythmia Episode List

Device: **Evera S VR DVBC3D1**

Serial Number:

Date of Visit: **23-Nov-2020 21:02:20**

Patient:

ID:

Physician:

**Arrhythmia Episode List:** 25-Apr-2016 20:45:20 to 23-Nov-2020 21:02:20

All collected episodes.

| Type                                            | ATP Seq | Shocks | Success | ID# | Date        | Time<br>hh:mm | Duration<br>hh:mm:ss | Avg bpm<br>V | Max bpm<br>V | Activity at<br>Onset |
|-------------------------------------------------|---------|--------|---------|-----|-------------|---------------|----------------------|--------------|--------------|----------------------|
| (No data since last session.)                   |         |        |         |     |             |               |                      |              |              |                      |
| ----- Last Programmer Session 23-Nov-2020 ----- |         |        |         |     |             |               |                      |              |              |                      |
| VT-Mon                                          |         |        |         | 210 | 22-Nov-2020 | 22:11         | :17                  | 137          | 140          | Active               |
| VF                                              | 0       | 35J    | Yes     | 209 | 21-Nov-2020 | 05:47         | :14                  | 353          | ---          | Rest                 |
| VF                                              | 0       | 35J    | Yes     | 208 | 19-Nov-2020 | 06:31         | :14                  | 353          | ---          | Rest                 |
| VF                                              | 0       | 35J    | Yes     | 207 | 19-Nov-2020 | 05:00         | :14                  | 353          | ---          | Rest                 |
| VF                                              | 0       | 35J    | Yes     | 206 | 17-Nov-2020 | 09:16         | :14                  | 300          | 316          | Rest                 |
| VF                                              | 0       | 35J    | Yes     | 205 | 15-Nov-2020 | 08:00         | :14                  | 286          | 300          | Rest                 |
| VF                                              | 0       | 35J    | Yes     | 204 | 13-Nov-2020 | 05:49         | :14                  | 316          | 333          | Rest                 |
| VT-Mon                                          |         |        |         | 203 | 12-Nov-2020 | 10:20         | :01:13               | 144          | 154          | Active               |
| VT                                              | 1       |        | Yes     | 202 | 12-Nov-2020 | 10:20         | :08                  | 158          | 158          | Active               |
| VT-Mon                                          |         |        |         | 201 | 12-Nov-2020 | 10:19         | :22                  | 154          | 158          | Active               |
| VF                                              | 0       | 35J    | Yes     | 200 | 09-Nov-2020 | 04:50         | :13                  | 353          | ---          | Rest                 |
| VF                                              | 0       | 35J    | Yes     | 199 | 06-Nov-2020 | 05:06         | :15                  | 333          | ---          | Rest                 |
| VT-Mon                                          |         |        |         | 198 | 01-Nov-2020 | 12:21         | :07                  | 135          | 136          | Active               |
| VF                                              | 0       | 35J    | Yes     | 197 | 01-Nov-2020 | 04:57         | :14                  | 316          | ---          | Rest                 |
| VF                                              | 0       | 35J    | Yes     | 196 | 29-Oct-2020 | 06:50         | :14                  | 333          | 333          | Rest                 |
| VF                                              | 0       | 35J    | Yes     | 195 | 29-Oct-2020 | 05:56         | :14                  | 333          | ---          | Rest                 |
| VT-NS                                           |         |        |         | 194 | 29-Oct-2020 | 05:56         | :02                  | 314          | ---          | Rest                 |
| VF                                              | 0       | 35J    | Yes     | 193 | 27-Oct-2020 | 08:41         | :13                  | 375          | ---          | Rest                 |
| VF                                              | 0       | 35J    | Yes     | 192 | 27-Oct-2020 | 06:43         | :13                  | 286          | 300          | Rest                 |
| VF                                              | 0       | 35J    | Yes     | 191 | 27-Oct-2020 | 06:17         | :14                  | 316          | ---          | Rest                 |
| VT-Mon                                          |         |        |         | 190 | 13-Oct-2020 | 17:33         | :26                  | 136          | 143          | Active               |
| VT-Mon                                          |         |        |         | 189 | 13-Oct-2020 | 17:27         | :17                  | 137          | 140          | Active               |
| VT-Mon                                          |         |        |         | 188 | 13-Oct-2020 | 17:26         | :24                  | 136          | 140          | Active               |
| VT-Mon                                          |         |        |         | 187 | 12-Oct-2020 | 18:16         | :45                  | 138          | 140          | Active               |
| VT-Mon                                          |         |        |         | 186 | 11-Oct-2020 | 17:13         | :06:34               | 146          | 154          | Active               |
| VT-Mon                                          |         |        |         | 185 | 07-Oct-2020 | 17:55         | :09                  | 135          | 140          | Active               |
| VF                                              | 0       | 35J    | Yes     | 184 | 26-Sep-2020 | 07:54         | :13                  | 375          | ---          | Rest                 |
| VT-Mon                                          |         |        |         | 183 | 15-Sep-2020 | 18:15         | :11                  | 135          | 136          | Active               |
| VT-Mon                                          |         |        |         | 182 | 15-Sep-2020 | 18:14         | :26                  | 136          | 140          | Active               |
| VT-Mon                                          |         |        |         | 181 | 15-Sep-2020 | 18:14         | :07                  | 134          | 136          | Active               |
| VT-Mon                                          |         |        |         | 180 | 15-Sep-2020 | 18:06         | :35                  | 147          | 154          | Active               |
| VT-Mon                                          |         |        |         | 179 | 15-Sep-2020 | 17:57         | :37                  | 135          | 136          | Active               |
| VT                                              | 1       |        | Yes     | 164 | 15-Aug-2020 | 18:24         | :08                  | 162          | ---          | Active               |
| SVT-Wavelet                                     |         |        |         | 158 | 11-Aug-2020 | 18:43         | :05                  | 158          | 158          | Active               |
| VT                                              | 1       |        | Yes     | 155 | 01-Aug-2020 | 18:22         | :09                  | 162          | ---          | Active               |
| SVT-Wavelet                                     |         |        |         | 146 | 23-Jul-2020 | 18:35         | :29                  | 162          | 167          | Active               |
| SVT-Wavelet                                     |         |        |         | 145 | 22-Jul-2020 | 18:56         | :07                  | 162          | ---          | Active               |
| SVT-Wavelet                                     |         |        |         | 144 | 21-Jul-2020 | 18:18         | :02:40               | 167          | 167          | Active               |
| VT                                              | 1       |        | Yes     | 141 | 01-Jul-2020 | 18:21         | :03                  | 162          | 162          | Active               |
| SVT-Wavelet                                     |         |        |         | 140 | 01-Jul-2020 | 18:21         | :18                  | 162          | 162          | Active               |
| VT-NS                                           |         |        |         | 138 | 01-Jul-2020 | 01:37         | :02                  | 218          | ---          | Rest                 |
| VF                                              | 0       | 35J    | Yes     | 136 | 25-Jun-2020 | 02:17         | :14                  | 333          | ---          | Rest                 |
| VT-NS                                           |         |        |         | 135 | 25-Jun-2020 | 01:45         | <:01                 | 250          | ---          | Rest                 |
| VF                                              | 0       | 35J    | Yes     | 134 | 22-Jun-2020 | 10:40         | :14                  | 316          | ---          | Rest                 |
| VF                                              | 0       | 35J    | Yes     | 133 | 09-Jun-2020 | 06:35         | :15                  | 400          | ---          | Rest                 |
| VT                                              | 1       |        | Yes     | 130 | 28-May-2020 | 18:16         | :06                  | 162          | ---          | Active               |
| SVT-Wavelet                                     |         |        |         | 129 | 24-May-2020 | 18:09         | :07                  | 162          | ---          | Active               |
| VF                                              | 0       | 35J    | Yes     | 128 | 14-May-2020 | 07:20         | :14                  | 333          | ---          | Rest                 |
| VF                                              | 0       | 35J    | Yes     | 126 | 02-May-2020 | 03:33         | :13                  | 375          | ---          | Rest                 |
| VF                                              | 0       | 35J    | Yes     | 125 | 29-Apr-2020 | 04:23         | :13                  | 353          | ---          | Rest                 |

# Arrhythmia Episode List

 Device: **Evera S VR DVBC3D1**

Serial Number:

 Date of Visit: **23-Nov-2020 21:02:20**

Patient:

ID:

Physician:

| Type         | ATP Seq | Shocks | Success | ID# | Date        | Time<br>hh:mm | Duration<br>hh:mm:ss | Avg bpm<br>V | Max bpm<br>V | Activity at<br>Onset |
|--------------|---------|--------|---------|-----|-------------|---------------|----------------------|--------------|--------------|----------------------|
| VF           | 0       | 35J    | Yes     | 124 | 28-Apr-2020 | 11:43         | :18                  | 353          | 353          | Active               |
| VF           | 0       | 35J    | Yes     | 123 | 28-Apr-2020 | 06:19         | :13                  | 353          | ---          | Rest                 |
| VT-NS        |         |        |         | 122 | 28-Apr-2020 | 06:19         | :01                  | 308          |              | Rest                 |
| VF           | 0       | 35J    | Yes     | 121 | 28-Apr-2020 | 05:42         | :13                  | 316          | 316          | Active               |
| VF           | 0       | 35J    | Yes     | 120 | 28-Apr-2020 | 05:02         | :13                  | 353          | ---          | Rest                 |
| High Rate-NS |         |        |         | 119 | 25-Apr-2020 | 02:02         | :03                  | 283          |              | Active               |
| VF           | 0       | 35J    | Yes     | 118 | 25-Apr-2020 | 01:32         | :12                  | 375          | ---          | Rest                 |
| VF           | 0       | 35J    | Yes     | 117 | 20-Apr-2020 | 00:40         | :14                  | 333          | ---          | Rest                 |
| VF           | 0       | 35J    | Yes     | 116 | 19-Apr-2020 | 03:14         | :14                  | 300          | 300          | Rest                 |
| High Rate-NS |         |        |         | 115 | 15-Apr-2020 | 14:21         | :01                  | 279          |              | Rest                 |
| VF           | 0       | 35J    | Yes     | 114 | 15-Apr-2020 | 11:36         | :12                  | 375          | ---          | Rest                 |
| VF           | 0       | 35J    | Yes     | 113 | 15-Apr-2020 | 11:03         | :13                  | 375          | ---          | Rest                 |
| High Rate-NS |         |        |         | 112 | 15-Apr-2020 | 09:06         | :01                  | 276          |              | Rest                 |
| VF           | 0       | 35J    | Yes     | 111 | 15-Apr-2020 | 08:29         | :12                  | 333          | 353          | Active               |
| VT-NS        |         |        |         | 110 | 14-Apr-2020 | 08:34         | :01                  | 214          |              | Rest                 |
| VF           | 0       | 35J    | Yes     | 109 | 14-Apr-2020 | 01:30         | :13                  | 261          | 300          | Rest                 |
| VT-NS        |         |        |         | 108 | 14-Apr-2020 | 01:30         | :03                  | 317          |              | Rest                 |
| VT-NS        |         |        |         | 107 | 13-Apr-2020 | 07:50         | :01                  | 240          |              | Rest                 |
| VF           | 0       | 35J    | Yes     | 106 | 13-Apr-2020 | 03:15         | :13                  | 353          | ---          | Rest                 |
| VF           | 0       | 35J    | Yes     | 105 | 11-Apr-2020 | 18:26         | :12                  | 400          | ---          | Rest                 |
| VF           | 0       | 35J    | Yes     | 104 | 11-Apr-2020 | 07:46         | :12                  | 333          | ---          | Rest                 |
| VF           | 0       | 35J    | Yes     | 103 | 11-Apr-2020 | 04:30         | :12                  | 375          | ---          | Rest                 |
| VF           | 0       | 35J    | Yes     | 102 | 09-Apr-2020 | 06:16         | :13                  | 353          | ---          | Rest                 |
| VF           | 0       | 35J    | Yes     | 101 | 08-Apr-2020 | 04:51         | :13                  | 333          | ---          | Rest                 |
| VF           | 0       | 35J    | Yes     | 100 | 07-Apr-2020 | 04:04         | :12                  | 333          | 333          | Active               |
| VF           | 0       | 35J    | Yes     | 99  | 07-Apr-2020 | 03:20         | :13                  | 333          | 353          | Rest                 |
| VF           | 0       | 35J    | Yes     | 98  | 04-Apr-2020 | 09:17         | :29                  | 375          | ---          | Rest                 |
| VF           | 0       | 35J    | Yes     | 97  | 04-Apr-2020 | 08:47         | :38                  | 353          | ---          | Rest                 |
| VT-NS        |         |        |         | 96  | 04-Apr-2020 | 08:46         | :02                  | 279          |              | Rest                 |
| VF           | 0       | 35J    | Yes     | 95  | 03-Apr-2020 | 05:40         | :13                  | 375          | ---          | Rest                 |
| VF           | 0       | 35J    | Yes     | 94  | 27-Mar-2020 | 07:42         | :14                  | 353          | ---          | Rest                 |
| VF           | 0       | 35J    | Yes     | 93  | 24-Mar-2020 | 06:23         | :13                  | 300          | 333          | Rest                 |
| VF           | 0       | 35J    | Yes     | 92  | 24-Mar-2020 | 05:31         | :14                  | 316          | 333          | Rest                 |
| VF           | 0       | 35J    | Yes     | 91  | 22-Mar-2020 | 06:24         | :13                  | 300          | 300          | Rest                 |
| VF           | 0       | 35J    | Yes     | 90  | 07-Mar-2020 | 04:50         | :14                  | 333          | ---          | Rest                 |
| High Rate-NS |         |        |         | 89  | 07-Mar-2020 | 04:50         | :02                  | 290          |              | Rest                 |
| VF           | 0       | 35J    | Yes     | 88  | 05-Mar-2020 | 02:23         | :13                  | 375          | ---          | Rest                 |
| VF           | 0       | 35J    | Yes     | 87  | 04-Mar-2020 | 04:53         | :14                  | 333          | ---          | Rest                 |
| VF           | 0       | 35J    | Yes     | 86  | 04-Mar-2020 | 01:32         | :14                  | 316          | 316          | Rest                 |
| VF           | 0       | 35J    | Yes     | 85  | 03-Mar-2020 | 05:48         | :13                  | 353          | 353          | Active               |
| High Rate-NS |         |        |         | 84  | 29-Feb-2020 | 03:11         | :02                  | 283          |              | Rest                 |
| VT-NS        |         |        |         | 83  | 25-Feb-2020 | 10:50         | :01                  | 240          |              | Rest                 |
| VF           | 0       | 35J    | Yes     | 82  | 25-Feb-2020 | 09:46         | :12                  | 333          | 353          | Active               |
| VF           | 0       | 35J    | Yes     | 81  | 25-Feb-2020 | 07:29         | :13                  | 333          | 353          | Rest                 |
| VF           | 0       | 35J    | Yes     | 80  | 03-Nov-2019 | 05:18         | :13                  | 375          | ---          | Rest                 |
| VF           | 0       |        |         | 79  | 22-Oct-2019 | 07:33         | :07                  | 316          | ---          | Rest                 |
| VF           | 0       | 35J    | Yes     | 78  | 21-Oct-2019 | 06:01         | :13                  | 333          | ---          | Rest                 |
| VF           | 0       | 35J    | Yes     | 77  | 19-Oct-2019 | 09:59         | :14                  | 353          | ---          | Rest                 |
| VF           | 0       | 35J    | Yes     | 75  | 23-Sep-2019 | 07:26         | :13                  | 400          | ---          | Rest                 |
| VT           | 9       | 35J    | Yes     | 74  | 10-Sep-2019 | 17:57         | :01:17               | 188          | 188          | Active               |
| SVT-Wavelet  |         |        |         | 73  | 10-Sep-2019 | 17:55         | :10                  | 176          | ---          | Active               |
| SVT-Wavelet  |         |        |         | 72  | 10-Sep-2019 | 17:54         | :18                  | 171          | 171          | Active               |
| VT           | 3       |        | Yes     | 71  | 10-Sep-2019 | 17:53         | :20                  | 182          | 182          | Active               |
| SVT-Wavelet  |         |        |         | 70  | 10-Sep-2019 | 17:51         | :01:41               | 182          | 188          | Active               |
| VT           | 2       |        | Yes     | 69  | 10-Sep-2019 | 17:51         | :10                  | 188          | 188          | Active               |

# Arrhythmia Episode List

 Device: **Evera S VR DVBC3D1**

Serial Number:

 Date of Visit: **23-Nov-2020 21:02:20**

Patient:

ID:

Physician:

| Type        | ATP Seq | Shocks | Success | ID# | Date        | Time<br>hh:mm | Duration<br>hh:mm:ss | Avg bpm<br>V | Max bpm<br>V | Activity at<br>Onset |
|-------------|---------|--------|---------|-----|-------------|---------------|----------------------|--------------|--------------|----------------------|
| SVT-Wavelet |         |        |         | 68  | 10-Sep-2019 | 17:51         | :13                  | 176          | 188          | Active               |
| VT          | 3       |        | Yes     | 67  | 10-Sep-2019 | 17:50         | :18                  | 176          | 176          | Active               |
| SVT-Wavelet |         |        |         | 66  | 10-Sep-2019 | 17:50         | :10                  | 176          | 176          | Active               |
| VT          | 1       |        | Yes     | 65  | 14-Jul-2019 | 12:03         | :11                  | 176          | ---          | Active               |
| VT-NS       |         |        |         | 64  | 14-Jul-2019 | 12:02         | <:01                 | 171          |              | Active               |
| SVT-Wavelet |         |        |         | 63  | 01-Jul-2019 | 12:25         | :10                  | 171          | 171          | Active               |
| VT-NS       |         |        |         | 62  | 07-May-2019 | 09:08         | :03                  | 171          |              | Active               |
| VT          | 1       |        | Yes     | 61  | 07-May-2019 | 09:08         | :10                  | 176          | ---          | Active               |
| VT-NS       |         |        |         | 60  | 30-Apr-2019 | 21:02         | :01                  | 171          |              | Active               |
| VT          | 1       |        | Yes     | 59  | 30-Apr-2019 | 21:00         | :12                  | 176          | 176          | Active               |
| VT          | 2       |        | Yes     | 58  | 30-Apr-2019 | 20:59         | :16                  | 176          | 176          | Active               |
| VT          | 2       |        | Yes     | 57  | 30-Apr-2019 | 20:49         | :17                  | 171          | 171          | Active               |
| VT-NS       |         |        |         | 56  | 30-Apr-2019 | 20:48         | :02                  | 171          |              | Active               |
| VT          | 3       |        | Yes     | 55  | 30-Apr-2019 | 20:47         | :22                  | 171          | 176          | Active               |
| VT-NS       |         |        |         | 54  | 30-Apr-2019 | 20:47         | :03                  | 171          |              | Active               |
| VT          | 2       |        | Yes     | 53  | 30-Apr-2019 | 20:46         | :15                  | 176          | 176          | Active               |
| VT          | 1       |        | Yes     | 52  | 30-Apr-2019 | 20:46         | :13                  | 171          | 171          | Active               |
| VT-NS       |         |        |         | 51  | 30-Apr-2019 | 20:45         | :04                  | 171          |              | Active               |
| VT          | 2       |        | Yes     | 50  | 30-Apr-2019 | 20:40         | :16                  | 176          | ---          | Active               |
| VT          | 1       |        | Yes     | 49  | 30-Apr-2019 | 20:39         | :10                  | 171          | 171          | Active               |
| VT          | 1       |        | Yes     | 48  | 30-Apr-2019 | 20:39         | :11                  | 171          | 171          | Active               |
| VT          | 2       |        | Yes     | 47  | 30-Apr-2019 | 20:24         | :16                  | 171          | 171          | Active               |
| VT          | 2       |        | Yes     | 46  | 30-Apr-2019 | 20:23         | :16                  | 171          | 171          | Active               |
| VT          | 1       |        | Yes     | 45  | 30-Apr-2019 | 20:22         | :12                  | 176          | ---          | Active               |
| VT          | 1       |        | Yes     | 43  | 30-Apr-2019 | 20:21         | :08                  | 171          | 171          | Active               |
| VT          | 3       |        | Yes     | 39  | 03-Dec-2018 | 10:25         | :27                  | 176          | 182          | Active               |
| VT          | 1       |        | Yes     | 37  | 03-Dec-2018 | 10:23         | :13                  | 176          | 176          | Active               |
| VT          | 1       |        | Yes     | 33  | 03-Dec-2018 | 10:20         | :13                  | 176          | ---          | Active               |
| SVT-Wavelet |         |        |         | 32  | 12-Oct-2018 | 10:45         | :12                  | 176          | ---          | Active               |
| SVT-Wavelet |         |        |         | 31  | 12-Oct-2018 | 10:45         | :10                  | 176          | 176          | Active               |
| VF          | 0       | 35J    | Yes     | 30  | 12-Oct-2018 | 08:05         | :14                  | 333          | ---          | Rest                 |
| VF          | 0       | 35J    | Yes     | 29  | 12-Oct-2018 | 05:29         | :13                  | 316          | ---          | Rest                 |
| VF          | 0       | 35J    | Yes     | 28  | 02-Sep-2018 | 07:20         | :13                  | 353          | 353          | Rest                 |
| VF          | 0       | 35J    | Yes     | 27  | 02-Sep-2018 | 06:04         | :13                  | 375          | ---          | Rest                 |
| VF          | 0       | 35J    | Yes     | 26  | 02-Sep-2018 | 05:41         | :13                  | 353          | ---          | Rest                 |
| VF          | 0       | 35J    | Yes     | 25  | 02-Sep-2018 | 04:56         | :13                  | 333          | 375          | Rest                 |
| VF          | 0       | 35J    | Yes     | 24  | 31-Aug-2018 | 05:08         | :13                  | 316          | 316          | Rest                 |
| VF          | 0       | 35J    | Yes     | 23  | 25-Jun-2018 | 03:04         | :12                  | 400          | ---          | Rest                 |
| SVT-Wavelet |         |        |         | 22  | 17-Dec-2017 | 11:32         | :31                  | 171          | 171          | Active               |
| SVT-Wavelet |         |        |         | 20  | 17-Sep-2017 | 03:31         | :25                  | 171          | 171          | Active               |
| SVT-Wavelet |         |        |         | 19  | 17-Sep-2017 | 03:29         | :54                  | 176          | 176          | Active               |
| VF          | 0       | 35J    | Yes     | 17  | 02-Sep-2017 | 06:03         | :12                  | 333          | 333          | Rest                 |
| VF          | 0       | 35J    | Yes     | 16  | 28-Aug-2017 | 07:06         | :12                  | 429          | ---          | Rest                 |
| VF          | 0       | 35J    | Yes     | 15  | 05-Jul-2017 | 07:48         | :13                  | 316          | 316          | Rest                 |
| VF          | 0       | 35J    | Yes     | 14  | 27-Jun-2017 | 10:28         | :13                  | 333          | 333          | Active               |
| VF          | 0       | 35J    | Yes     | 11  | 27-May-2017 | 21:18         | :13                  | 429          | ---          | Rest                 |
| VF          | 0       | 35J    | Yes     | 10  | 17-May-2017 | 06:01         | :14                  | 400          | ---          | Rest                 |
| SVT-Wavelet |         |        |         | 7   | 31-Jan-2017 | 22:32         | :49                  | 176          | 176          | Active               |
| SVT-Wavelet |         |        |         | 6   | 31-Jan-2017 | 16:20         | :21                  | 176          | 176          | Active               |



# Treated VT/VF Episode #209

Device: **Evera S VR DVBC3D1**

Serial Number:

Date of Visit: **23-Nov-2020 21:02:20**

Patient:

ID:

Physician:

| Type | ATP Seq | Shocks | Success | ID# | Date        | Time<br>hh:mm | Duration<br>hh:mm:ss | Avg bpm<br>V | Max bpm<br>V | Activity at<br>Onset |
|------|---------|--------|---------|-----|-------------|---------------|----------------------|--------------|--------------|----------------------|
| VF   | 0       | 35J    | Yes     | 209 | 21-Nov-2020 | 05:47         | :14                  | 353          | ---          | Rest                 |

• V-V      VF = 320 ms      VT = 390 ms

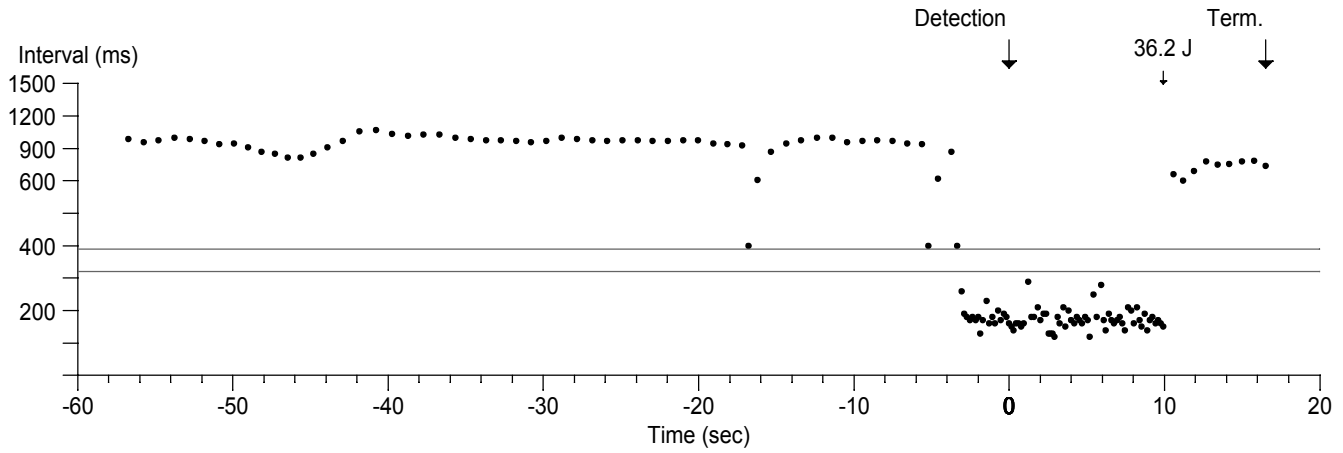

# Treated VT/VF Episode #209

Device: **Evera S VR DVBC3D1**

Serial Number:

Date of Visit: **23-Nov-2020 21:02:20**

Patient:

ID:

**Episode #209 - VF Chart speed: 25.0 mm/sec**

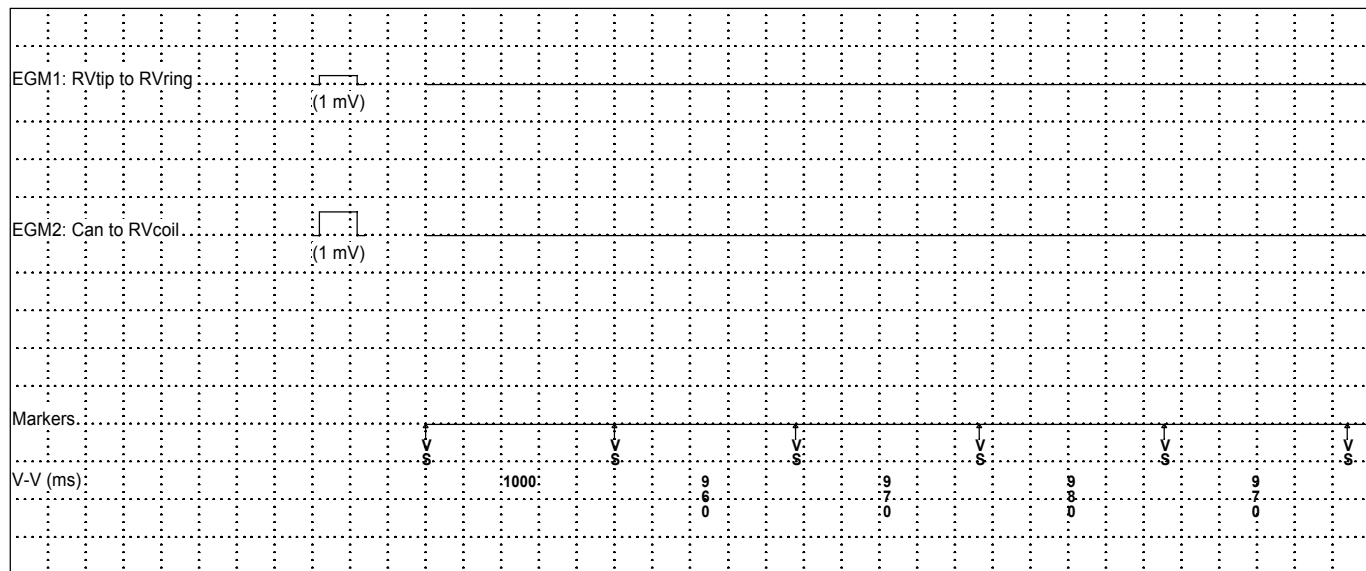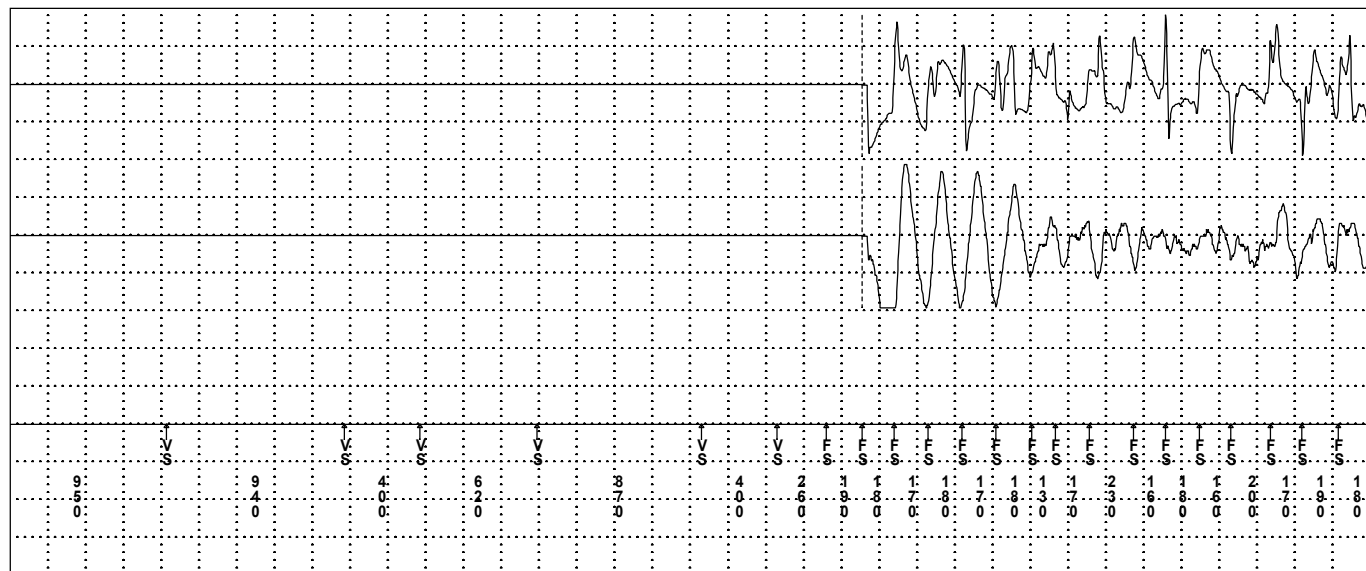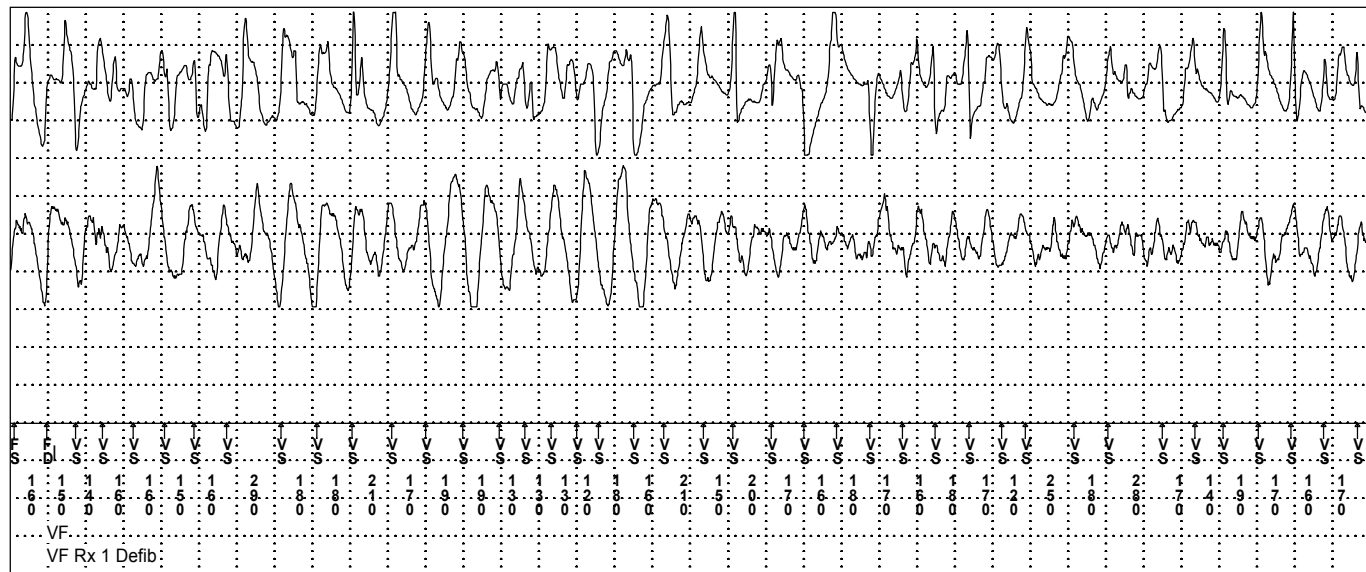

# Treated VT/VF Episode #209

Device: **Evera S VR DVBC3D1**

Serial Number:

Date of Visit: **23-Nov-2020 21:02:20**

Patient:

ID:

**Episode #209 - VF Chart speed: 25.0 mm/sec**

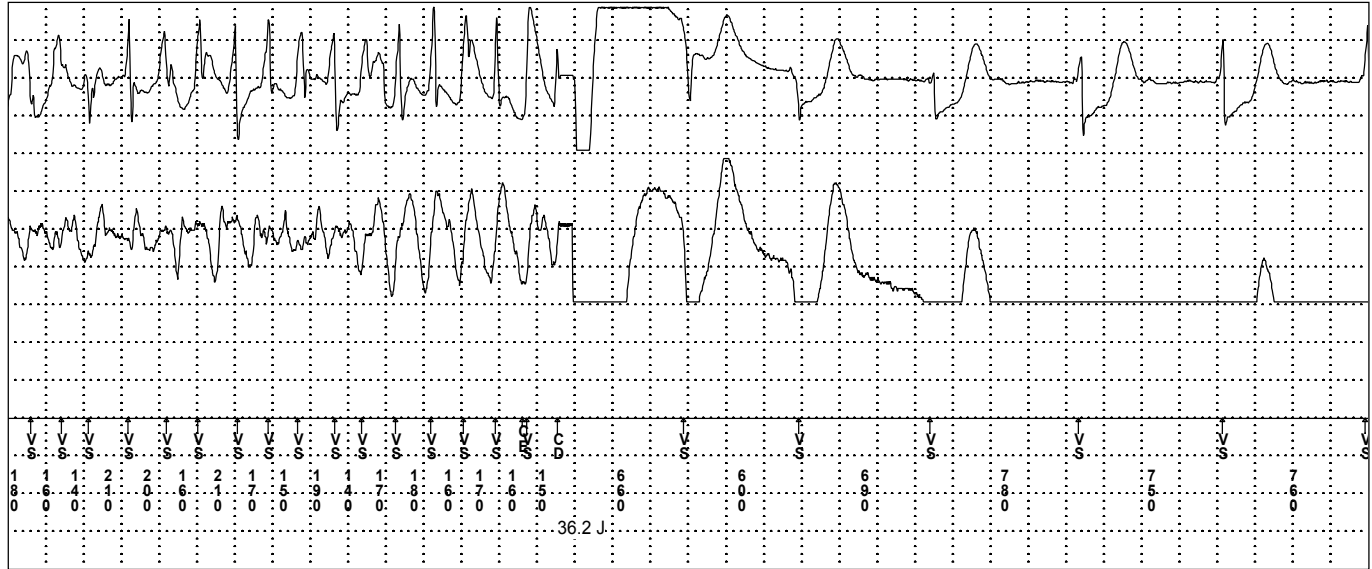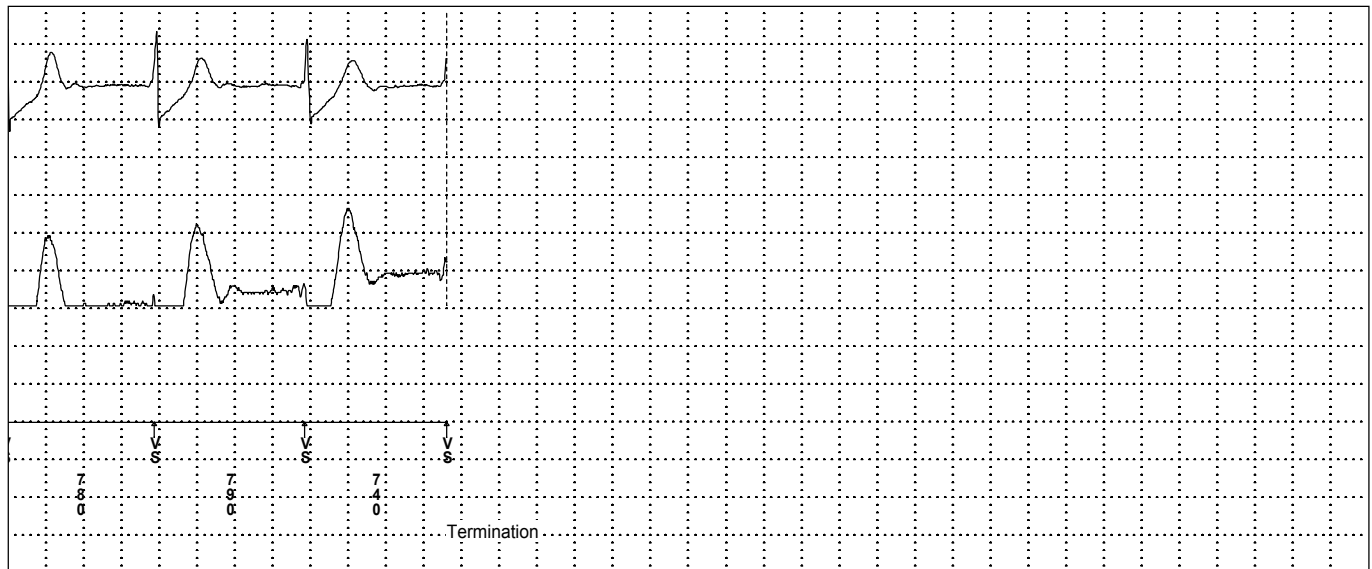

# Treated VT/VF Episode #209

 Device: **Evera S VR DVBC3D1**

Serial Number:

 Date of Visit: **23-Nov-2020 21:02:20**

Patient:

ID:

Physician:

## Episode #209: 21-Nov-2020 05:47:25

### Episode Summary

Initial Type VF (spontaneous)  
 Duration 14 sec  
 V. Max Rate ---  
 V. Median 333 bpm (180 ms)  
 Activity at onset Rest, Sensor = 43 bpm  
 Last Therapy VF Rx1: Defib, Successful

### Initial VT/VF Detection Withheld By

None

| Therapies     | Delivered | Charge   | Ohms    | Energy     |
|---------------|-----------|----------|---------|------------|
| VF Rx 1 Defib | 36.2 J    | 9.68 sec | 48 ohms | 0.0 - 35 J |
|               |           |          |         |            |
| Termination   |           |          |         |            |

### Wavelet Measurements Prior to Initial VT/VF Detection

Wavelet Result: Wavelet not applied; interval too fast or too slow  
 Template Status: OK

- 8. No Match --- Interval too fast
- 7. No Match --- Interval too fast
- 6. No Match --- Interval too fast
- 5. No Match --- Interval too fast
- 4. No Match --- Interval too fast
- 3. No Match --- Interval too fast
- 2. No Match --- Interval too fast
- 1. No Match --- Interval too fast
- 0. Detection

| Parameter Settings | Initial | Redetect | V. Interval (Rate) |
|--------------------|---------|----------|--------------------|
| VF On              | 18/24   | 9/12     | 320 ms (188 bpm)   |
| FVT Off            |         |          |                    |
| VT On              | 16      | 12       | 390 ms (154 bpm)   |
| Monitor Monitor    | 32      |          | 450 ms (133 bpm)   |

### Wavelet

Wavelet On, Match = 70 %  
 Template 20-Nov-2020, Auto = On  
 SVT V. Limit 260 ms

### Other Enhancements

Stability Off  
 Onset Off  
 High Rate Timeout  
     VF Zone Only 0.75 min  
     All Zones Off  
 TWave On  
 RV Lead Noise On+Timeout  
 Timeout 0.75 min

| Polarity       | RV      |
|----------------|---------|
| Pace Polarity  | Bipolar |
| Sense Polarity | Bipolar |

| EGM            | Source          | Range     | Sensitivity |
|----------------|-----------------|-----------|-------------|
| EGM1           | RVtip to RVring | +/- 8 mV  | RV 0.3 mV   |
| EGM2 (Wavelet) | Can to RVcoil   | +/- 12 mV |             |

# Treated VT/VF Episode #209

Device: **Evera S VR DVBC3D1**

Serial Number:

Date of Visit: **23-Nov-2020 21:02:20**

Patient:

ID:

Physician:

| Type | ATP Seq | Shocks | Success | ID# | Date        | Time<br>hh:mm | Duration<br>hh:mm:ss | Avg bpm<br>V | Max bpm<br>V | Activity at<br>Onset |
|------|---------|--------|---------|-----|-------------|---------------|----------------------|--------------|--------------|----------------------|
| VF   | 0       | 35J    | Yes     | 209 | 21-Nov-2020 | 05:47         | :14                  | 353          | ---          | Rest                 |

No Match ---                      No Match ---                      No Match ---                      No Match ---

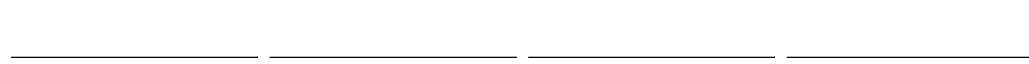

6 mV  
 20 ms  
 — QRS  
 - - - - Template

No Match ---                      No Match ---                      No Match ---                      No Match ---

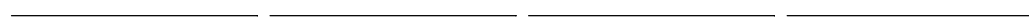

# Lead Trends - RV

Device: **Evera S VR DVBC3D1**

Serial Number:

Date of Visit: **23-Nov-2020 21:02:20**

Patient:

ID:

Physician:

RV Pace Polarity      **Bipolar**  
RV Sense Polarity    **Bipolar**

## RV Impedance (bipolar)

Last Measured 475 ohms

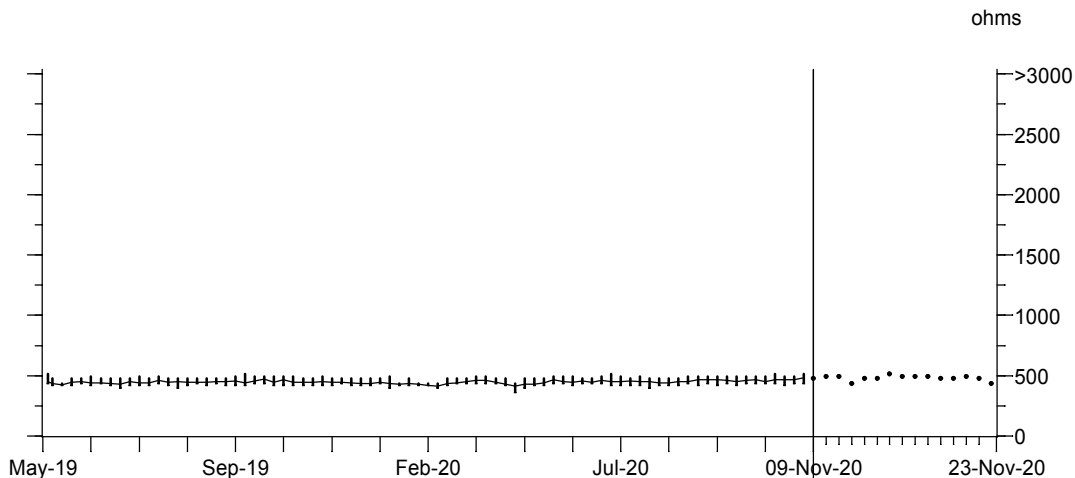

## RV Impedance (tip to coil)

Last Measured 399 ohms

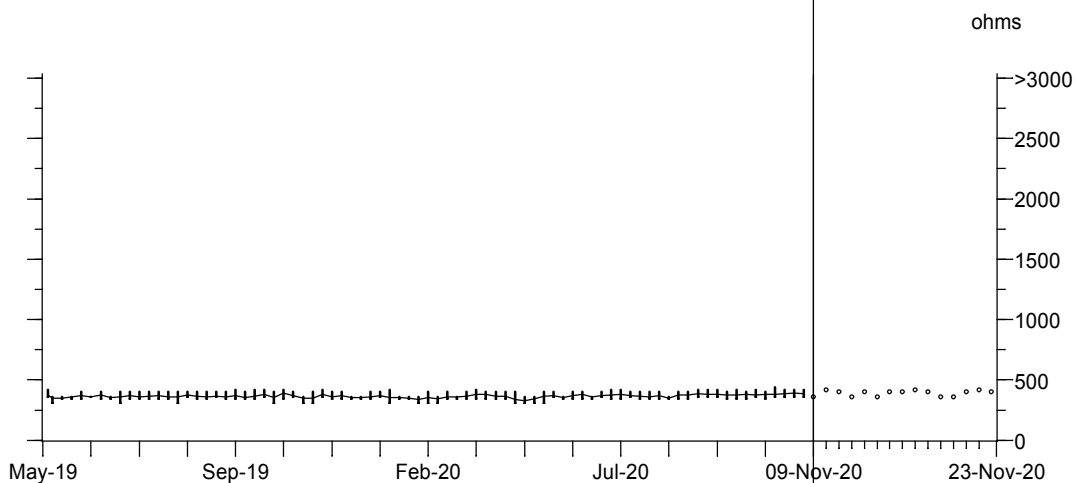

## RV Impedance

—— Bipolar  
- - - - Tip to Coil

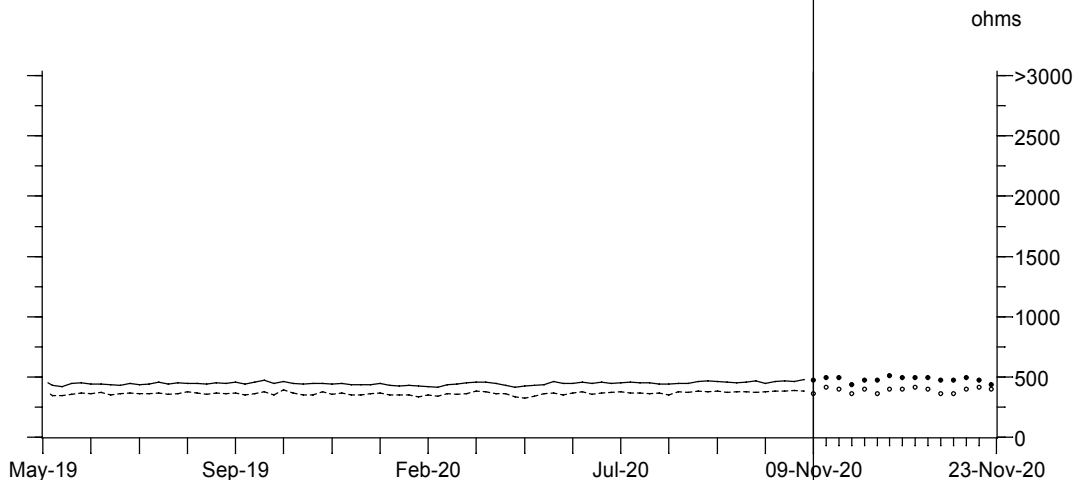

Last 80 weeks (min/max/avg per week)

Last 15 days

# Lead Trends - RV

Device: **Evera S VR DVBC3D1**

Serial Number:

Date of Visit: **23-Nov-2020 21:02:20**

Patient:

ID:

Physician:

## RV Threshold

Capture Adaptive  
Amplitude 2.00 V  
Pulse Width 0.40 ms  
Last Measured 0.875 V @ 0.40 ms  
Measured On 22-Nov-2020

V @ 0.40 ms

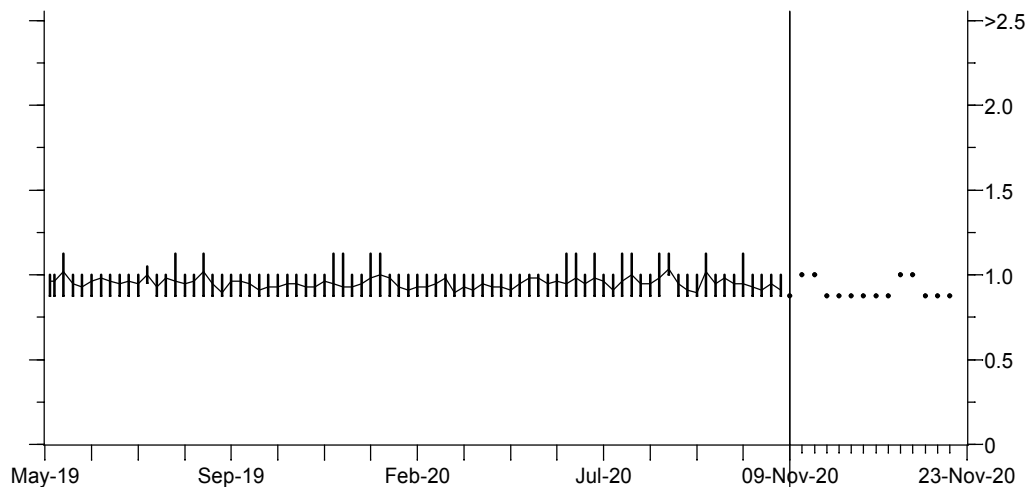

## R-Wave Amplitude

Sensitivity 0.30 mV  
Last Measured 15.1 mV

mV

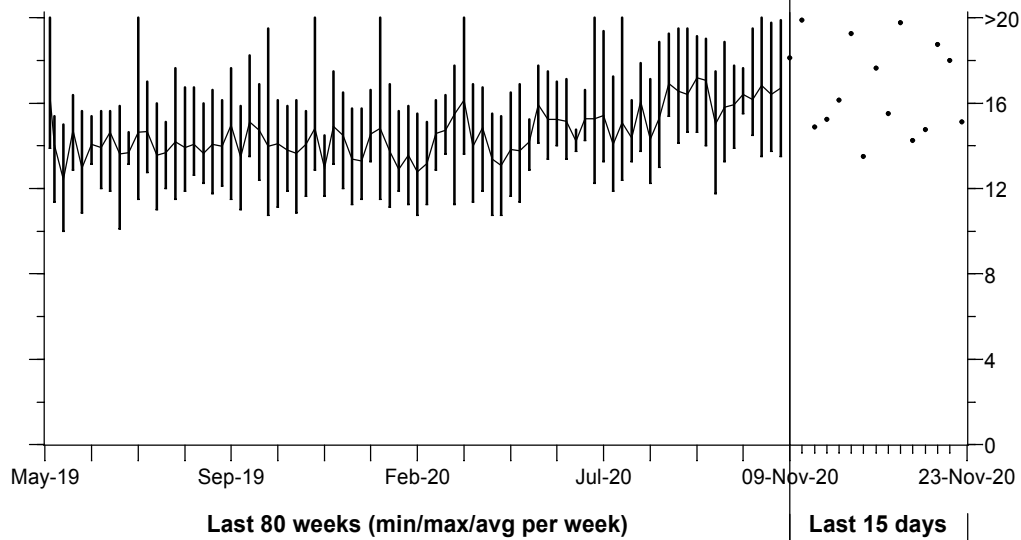

# Lead Trends - RV

Device: **Evera S VR DVBC3D1**

Serial Number:

Date of Visit: **23-Nov-2020 21:02:20**

Patient:

ID:

Physician:

## RV Defib Impedance

Last Measured 48 ohms

ohms

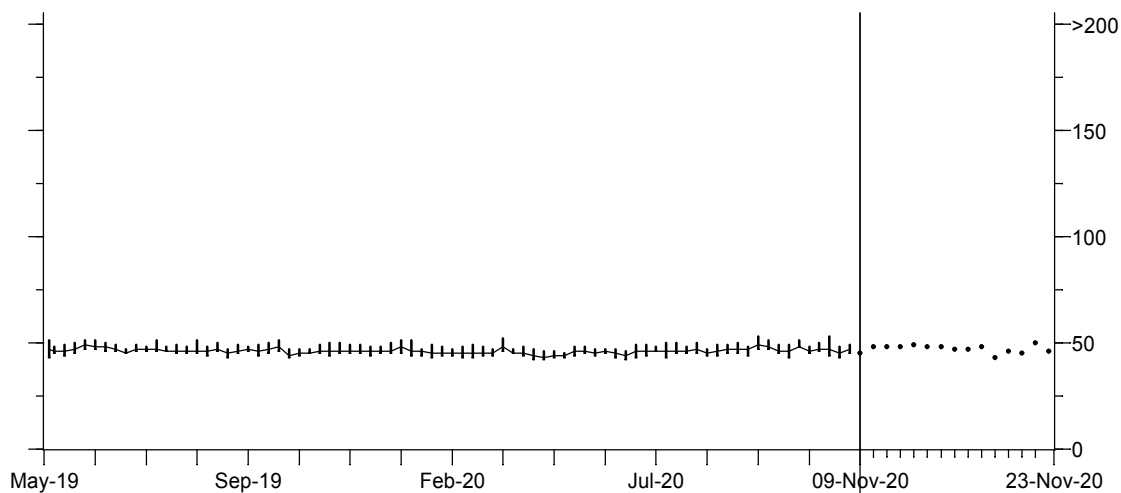

## SVC Defib Impedance

Last Measured 68 ohms

ohms

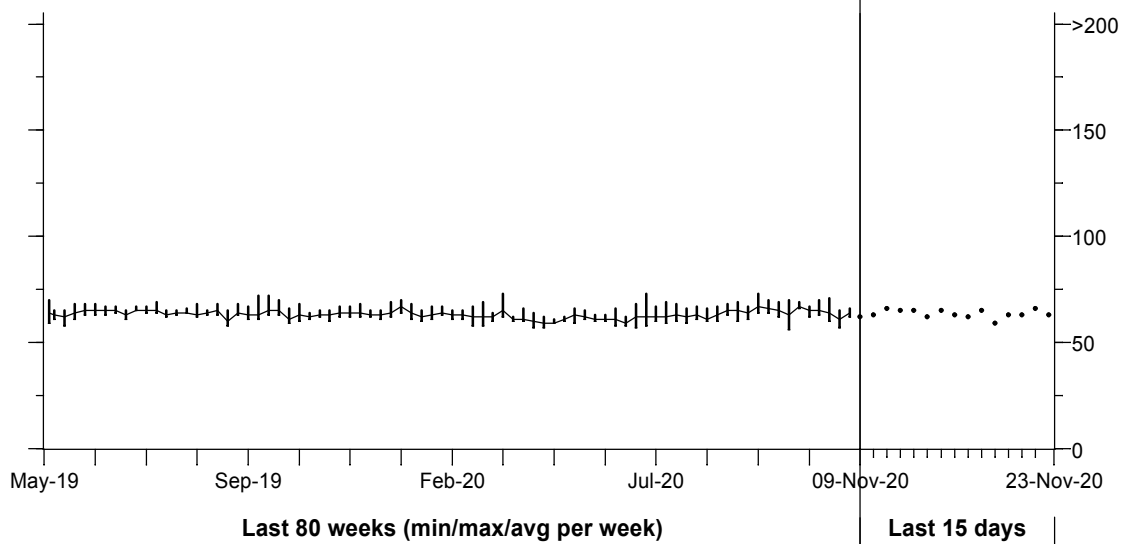



# Battery and Lead Measurements Report

Device: **Evera S VR DVBC3D1**

Serial Number:

Date of Visit: **23-Nov-2020 21:02:20**

Patient:

ID:

Physician:

Last Interrogation: 23-Nov-2020 21:02:20

## **Remaining Longevity** **23-Nov-2020**

|               |                |     |
|---------------|----------------|-----|
| Estimated at: | Replace Device | RRT |
| Minimum:      | Replace Device |     |
| Maximum:      | Replace Device |     |

(RRT on 22-Nov-2020)  
(based on initial interrogation)

## **Battery Voltage** **23-Nov-2020**

|         |        |
|---------|--------|
| Voltage | 2.72 V |
|---------|--------|

(RRT=2.73V on 22-Nov-2020)

## **Last Charge** **21-Nov-2020**

|             |            |
|-------------|------------|
| Charge Time | 9.7 sec    |
| Energy      | 0.0 - 35 J |

## **Sensing Integrity Counter** **Since 23-Nov-2020**

|                     |   |
|---------------------|---|
| Short V-V Intervals | 0 |
|---------------------|---|

## **Lead Impedance**

|                     |          |             |
|---------------------|----------|-------------|
| RV Pacing (Bipolar) | 475 ohms | 23-Nov-2020 |
| RV Defib            | 48 ohms  | 23-Nov-2020 |
| SVC Defib           | 68 ohms  | 23-Nov-2020 |

## **Sensing**

|                  |         |             |
|------------------|---------|-------------|
| R-Wave Amplitude | 15.1 mV | 23-Nov-2020 |
|------------------|---------|-------------|

## **Last High Voltage Therapy** **21-Nov-2020**

|                    |          |
|--------------------|----------|
| Measured Impedance | 48 ohms  |
| Delivered Energy   | 36 J     |
| Waveform           | Biphasic |
| Pathway            | B>AX     |

# Parameters

Device: **Evera S VR DVBC3D1**

Serial Number:

Date of Visit: **23-Nov-2020 21:02:20**

Patient:

ID:

Physician:

## Pacing Summary

| Mode |     | Rates |        |
|------|-----|-------|--------|
| Mode | VVI | Lower | 40 bpm |

## Pacing Details

|                        | RV          |
|------------------------|-------------|
| Amplitude              | 2.00 V      |
| Pulse Width            | 0.40 ms     |
| Capture Management     | Adaptive    |
| Amplitude Margin       | 2.0 X       |
| Min. Adapted Amplitude | 2.00 V      |
| Acute Phase Remaining  | Off         |
| Acute Phase Completed  | 23-Aug-2016 |
| Sensitivity            | 0.30 mV     |
| Pace Polarity          | Bipolar     |
| Sense Polarity         | Bipolar     |

## Refractory/Blanking

|                  |        |
|------------------|--------|
| V. Blank Post VP | 200 ms |
| V. Blank Post VS | 120 ms |

## Arrhythmia Interventions

|                       |     |
|-----------------------|-----|
| V. Rate Stabilization | Off |
|-----------------------|-----|

## Post Shock Pacing

|                                          |         |
|------------------------------------------|---------|
| Post Shock Pacing*                       |         |
| V. Amplitude                             | 6 V     |
| V. Pulse Width                           | 1.50 ms |
| * Settings for first 25 beats post shock |         |
| Post VT/VF Shock Pacing                  | Off     |

## Additional Features

|                 |     |
|-----------------|-----|
| Rate Hysteresis | Off |
| Sleep           | Off |

## Device Information

|        |           |                    |                        |
|--------|-----------|--------------------|------------------------|
| Device | Medtronic | Evera S VR DVBC3D1 | Implanted: 25-Apr-2016 |
|--------|-----------|--------------------|------------------------|

# Parameters

 Device: **Evera S VR DVBC3D1**

Serial Number:

 Date of Visit: **23-Nov-2020 21:02:20**

Patient:

ID:

Physician:

**VT/VF Detection**

|         |         | V. Interval (Rate) | Initial | Redetect |                                                                             |
|---------|---------|--------------------|---------|----------|-----------------------------------------------------------------------------|
| VF      | On      | 320 ms (188 bpm)   | 18/24   | 9/12     | 320 ms                                                                      |
| FVT     | OFF     |                    |         |          |                                                                             |
| VT      | On      | 390 ms (154 bpm)   | 16      | 12       | 390 ms                                                                      |
| Monitor | Monitor | 450 ms (133 bpm)   | 32      |          | No Rx <span style="border: 1px solid black; padding: 2px;">  </span> 450 ms |

| Wavelet         | Other Enhancements | Sensitivity              |
|-----------------|--------------------|--------------------------|
| Wavelet         | On                 | Stability Off RV 0.30 mV |
| Template        | 22-Nov-2020        | Onset Off                |
| Match Threshold | 70 %               | High Rate Timeout        |
| Auto Collection | On                 | VF Zone Only 0.75 min    |
| SVT V. Limit    | 260 ms             | All Zones Off            |
|                 |                    | TWave On                 |
|                 |                    | RV Lead Noise On+Timeout |
|                 |                    | Timeout 0.75 min         |

| VF Therapies      | Rx1  | Rx2  | Rx3  | Rx4  | Rx5  | Rx6  |
|-------------------|------|------|------|------|------|------|
| VF Therapy Status | On   | On   | On   | On   | On   | On   |
| Energy            | 35 J |
| Pathway           | B>AX | AX>B | B>AX | AX>B | B>AX | AX>B |

ATP During Charging

Deliver ATP if last 8 R-R &gt;= 240 ms, Burst, Pulses = 8, R-S1 = 88 %, Decrement = 10 ms

ChargeSaver = On(1 episodes), SmartMode = On

| FVT Therapies      | Rx1 | Rx2 | Rx3 | Rx4 | Rx5 | Rx6 |
|--------------------|-----|-----|-----|-----|-----|-----|
| FVT Therapy Status | Off | Off | Off | Off | Off | Off |

| VT Therapies        | Rx1   | Rx2   | Rx3   | Rx4  | Rx5  | Rx6  |
|---------------------|-------|-------|-------|------|------|------|
| VT Therapy Status   | On    | On    | On    | On   | On   | On   |
| Therapy Type        | Burst | Ramp  | Ramp+ | CV   | CV   | CV   |
| Energy              |       |       |       | 35 J | 35 J | 35 J |
| Pathway             |       |       |       | B>AX | AX>B | AX>B |
| Initial # Pulses    | 8     | 8     | 3     |      |      |      |
| R-S1 Interval=(%RR) | 88 %  | 91 %  | 75 %  |      |      |      |
| S1S2(Ramp+)=(%RR)   |       |       | 69 %  |      |      |      |
| S2SN(Ramp+)=(%RR)   |       |       | 66 %  |      |      |      |
| Interval Dec        | 10 ms | 10 ms |       |      |      |      |
| # Sequences         | 3     | 3     | 3     |      |      |      |
| Smart Mode          | Off   | Off   | Off   |      |      |      |

**Shared V. ATP**

|                          |        |
|--------------------------|--------|
| V-V Minimum ATP Interval | 200 ms |
| V. Amplitude             | 8 V    |
| V. Pulse Width           | 1.5 ms |
| V. Pace Blanking         | 240 ms |

**Shared V. Therapies**

|                               |            |
|-------------------------------|------------|
| Active Can/SVC Coil           | Can+SVC On |
| Progressive Episode Therapies | Off        |
| Confirmation+                 | On         |

# Parameters

Device: **Evera S VR DVBC3D1**

Serial Number:

Date of Visit: **23-Nov-2020 21:02:20**

Patient:

ID:

Physician:

## Data Collection Setup

|                    | Source            | Range     |
|--------------------|-------------------|-----------|
| LECG               | Can to SVC        | +/- 2 mV  |
| EGM 1              | RVtip to RVring   | +/- 8 mV  |
| EGM 2 (Wavelet)    | Can to RVcoil     | +/- 12 mV |
| EGM 3              | RVtip to RVcoil   | +/- 8 mV  |
| Monitored          | EGM1 and EGM2     |           |
| Pre-arrhythmia EGM | Off               |           |
| Device Date/Time   | 23-Nov-2020 21:05 |           |
| Holter Telemetry   | Off               |           |

## Medtronic CareAlert Setup

Patient Home Monitor No  
Alert Time 08:00

| Alert Conditions                              | Enable-Urgency<br>Tone | Threshold          |
|-----------------------------------------------|------------------------|--------------------|
| Number of Shocks Delivered in an Episode      | Off                    |                    |
| All Therapies in a Zone Exhausted             | Off                    |                    |
| RV Lead Integrity                             | On-High                |                    |
| RV Lead Noise                                 | On-High                |                    |
| RV Pacing Lead Impedance Out of Range         | On-High                | <200 or >3000 ohms |
| RV Defibrillation Lead Impedance Out of Range | On-High                | <20 or >200 ohms   |
| SVC Defib Lead Impedance Out of Range         | On-High                | <20 or >200 ohms   |
| Low Battery Voltage RRT                       | On-High                | 2.73 V(RRT)        |
| Excessive Charge Time EOS                     | On-High                |                    |
| VF Detection OFF, 3+ VF or 3+ FVT Rx Off.     | On-High                |                    |

## Changes This Session

Device: **Evera S VR DVBC3D1**

Serial Number:

Date of Visit: **23-Nov-2020 21:02:20**

Patient:

ID:

Physician:

---

| <b>Parameter</b> | <b>Session Start</b> | <b>Current Value</b> |
|------------------|----------------------|----------------------|
|------------------|----------------------|----------------------|

---

No parameters have been changed during the current session.

# Patient Information Report

Device: **Evera S VR DVBC3D1**

Serial Number:

Date of Visit: **23-Nov-2020 21:02:20**

Patient:

ID:

Physician:

---

## Patient Identification

Patient

ID

Date of Birth

---

## History

VT/VF

Slowest VT

Atrial Status

AV Conduction

Heart Failure

Activity Level

EF, on

---

---

## Physician Information

Physician

Phone

Hospital

Last Update 03-Sep-2020

---

## Leads

Lead 1

Lead Model

Lead Position

Manufacturer

Serial Number

Implant Date

Lead 2

Lead Model

Lead Position

Manufacturer

Serial Number

Implant Date

Lead 3

Lead Model

Lead Position

Manufacturer

Serial Number

Implant Date

---

## Implant

Implant Date 25-Apr-2016

Defibrillation Energy ---

HV Impedance (ohms)

**RV**

---

R Wave Amplitude (mV)

Slew Rate ---

Pacing Threshold Amp. ---

Pulse Width Setting ---

Pacing Impedance (ohms)

Threshold Current (mA)

Notes:



# Session Summary

Device: **Evera S VR DVBC3D1**

Serial Number:

Date of Visit: **23-Nov-2020 21:02:20**

Patient:

ID:

Physician:

## Device Information

Device Medtronic Evera S VR DVBC3D1 Implanted: 25-Apr-2016

## Device Status (Implanted: 25-Apr-2016)

Remaining Longevity Replace Device RRT (23-Nov-2020)  
(RRT on 22-Nov-2020)  
(based on initial interrogation)

|                                  |                           |
|----------------------------------|---------------------------|
|                                  | <b>RV</b>                 |
|                                  | <b>SVC</b>                |
| Pacing Impedance                 | 475 ohms                  |
| Defibrillation Impedance         | RV=48 ohms<br>SVC=68 ohms |
| Pace Polarity                    | Bipolar                   |
| Capture Threshold                | 0.875 V @ 0.40 ms         |
| Measured On                      | 22-Nov-2020               |
| Programmed Amplitude/Pulse Width | 2.00 V / 0.40 ms          |
| Measured R Wave                  | 15.1 mV                   |
| Programmed Sensitivity           | 0.30 mV                   |

## Parameter Summary

Mode VVI Lower Rate 40 bpm

### Detection

VF On  
FVT OFF  
VT On

### Rates

>188 bpm  
154-188 bpm

### Therapies

ATP During Charging, 35J x 6  
All Rx Off  
Burst(3), Ramp(3), Ramp+(3), 35J x 3

Enhancements On: VT Monitor, Wavelet, High Rate Timeout, TWave, Noise(Timeout)

## Changes This Session

**Session Start** **Current Value**

No parameters have been changed during the current session.



# Rate Histograms

Device: **Evera S VR DVBC3D1**

Serial Number:

Date of Visit: **23-Nov-2020 21:02:20**

Patient:

ID:

Physician:

## Prior to Last Session

03-Sep-2020 to 23-Nov-2020

81 days

## Since Last Session

23-Nov-2020 to 23-Nov-2020

10 hours

% of Time

**VS** 100.0 %  
**VP** < 0.1%

100.0 %  
0.0 %

### Ventricular

% of Time

□ VS

■ VP



# Cardiac Compass Report

Device: **Evera S VR DVBC3D1**

Serial Number:

Date of Visit: **23-Nov-2020 21:02:20**

Patient:

ID:

Physician:



# VT/VF Counters

Device: **Evera S VR DVBC3D1**

Serial Number:

Date of Visit: **23-Nov-2020 21:02:20**

Patient:

ID:

Physician:

| Prior Session                 | Last Session                  | Device Lifetime                     |
|-------------------------------|-------------------------------|-------------------------------------|
| 03-Sep-2020 to<br>23-Nov-2020 | 23-Nov-2020 to<br>23-Nov-2020 | <b>Total</b><br>(Since 25-Apr-2016) |
| 81 days                       | 10 hours                      | 55 months                           |

### VT/VF Counters

| VT/VF Counters               | Prior Session | Last Session | Device Lifetime |
|------------------------------|---------------|--------------|-----------------|
| VF                           | 15            | 0 ↓          | 79              |
| FVT                          | 0             | 0            | 0               |
| VT                           | 1             | 0 ↓          | 27              |
| Monitored VT (133 - 154 bpm) | 22            | 0 ↓          |                 |
| VT-NS (>4 beats, >154 bpm)   | 1             | 0 ↓          |                 |
| High Rate-NS                 | 0             | 0            |                 |
| PVC Runs (2-4 beats)         | 3.2 per hour  | NA*          |                 |
| PVC Singles                  | 0.8 per hour  | NA*          |                 |
| Runs of VRS Paces            | 0.0 per hour  | NA*          |                 |
| Single VRS Paces             | 0.0 per hour  | NA*          |                 |

\*NA: Session duration less than 1 day.

### SVT: VT/VF Rx Withheld

|              |   |   |    |
|--------------|---|---|----|
| Wavelet      | 0 | 0 | 19 |
| V. Stability | 0 | 0 | 0  |
| Onset        | 0 | 0 | 0  |

### V. Oversensing: VT/VF Rx Withheld

|                      |   |   |   |
|----------------------|---|---|---|
| V. Oversensing-TWave | 0 | 0 | 0 |
| V. Oversensing-Noise | 0 | 0 | 0 |

### VT/VF Therapy Summary

|                    |          |   |          |
|--------------------|----------|---|----------|
| Pace-terminated    | 1 of 1   | 0 | 26 of 27 |
| Shock-terminated   | 15 of 15 | 0 | 79 of 79 |
| Total VT/VF Shocks | 15       | 0 | 79       |
| Aborted Charges    | 0        | 0 | 1        |

### VT/VF Therapy Efficacy Since Last Session 23-Nov-2020 to 23-Nov-2020

| VF Therapy | ATP+Chg | 35 J |
|------------|---------|------|------|------|------|------|------|
| Delivered  | 0       | 0    | 0    | 0    | 0    | 0    | 0    |
| Successful | 0       | 0    | 0    | 0    | 0    | 0    | 0    |

### FVT Therapy Off

| VT Therapy  | Burst | Ramp | Ramp+ | 35 J | 35 J | 35 J |
|-------------|-------|------|-------|------|------|------|
| Delivered   | 0     | 0    | 0     | 0    | 0    | 0    |
| Successful  | 0     | 0    | 0     | 0    | 0    | 0    |
| Accelerated | 0     | 0    | 0     | 0    | 0    | 0    |

# Arrhythmia Episode List

Device: **Evera S VR DVBC3D1**

Serial Number:

Date of Visit: **23-Nov-2020 21:02:20**

Patient:

ID:

Physician:

**Arrhythmia Episode List:** 25-Apr-2016 20:45:20 to 23-Nov-2020 21:02:20

All collected episodes.

| Type                                            | ATP Seq | Shocks | Success | ID# | Date        | Time<br>hh:mm | Duration<br>hh:mm:ss | Avg bpm<br>V | Max bpm<br>V | Activity at<br>Onset |
|-------------------------------------------------|---------|--------|---------|-----|-------------|---------------|----------------------|--------------|--------------|----------------------|
| (No data since last session.)                   |         |        |         |     |             |               |                      |              |              |                      |
| ----- Last Programmer Session 23-Nov-2020 ----- |         |        |         |     |             |               |                      |              |              |                      |
| VT-Mon                                          |         |        |         | 210 | 22-Nov-2020 | 22:11         | :17                  | 137          | 140          | Active               |
| VF                                              | 0       | 35J    | Yes     | 209 | 21-Nov-2020 | 05:47         | :14                  | 353          | ---          | Rest                 |
| VF                                              | 0       | 35J    | Yes     | 208 | 19-Nov-2020 | 06:31         | :14                  | 353          | ---          | Rest                 |
| VF                                              | 0       | 35J    | Yes     | 207 | 19-Nov-2020 | 05:00         | :14                  | 353          | ---          | Rest                 |
| VF                                              | 0       | 35J    | Yes     | 206 | 17-Nov-2020 | 09:16         | :14                  | 300          | 316          | Rest                 |
| VF                                              | 0       | 35J    | Yes     | 205 | 15-Nov-2020 | 08:00         | :14                  | 286          | 300          | Rest                 |
| VF                                              | 0       | 35J    | Yes     | 204 | 13-Nov-2020 | 05:49         | :14                  | 316          | 333          | Rest                 |
| VT-Mon                                          |         |        |         | 203 | 12-Nov-2020 | 10:20         | :01:13               | 144          | 154          | Active               |
| VT                                              | 1       |        | Yes     | 202 | 12-Nov-2020 | 10:20         | :08                  | 158          | 158          | Active               |
| VT-Mon                                          |         |        |         | 201 | 12-Nov-2020 | 10:19         | :22                  | 154          | 158          | Active               |
| VF                                              | 0       | 35J    | Yes     | 200 | 09-Nov-2020 | 04:50         | :13                  | 353          | ---          | Rest                 |
| VF                                              | 0       | 35J    | Yes     | 199 | 06-Nov-2020 | 05:06         | :15                  | 333          | ---          | Rest                 |
| VT-Mon                                          |         |        |         | 198 | 01-Nov-2020 | 12:21         | :07                  | 135          | 136          | Active               |
| VF                                              | 0       | 35J    | Yes     | 197 | 01-Nov-2020 | 04:57         | :14                  | 316          | ---          | Rest                 |
| VF                                              | 0       | 35J    | Yes     | 196 | 29-Oct-2020 | 06:50         | :14                  | 333          | 333          | Rest                 |
| VF                                              | 0       | 35J    | Yes     | 195 | 29-Oct-2020 | 05:56         | :14                  | 333          | ---          | Rest                 |
| VT-NS                                           |         |        |         | 194 | 29-Oct-2020 | 05:56         | :02                  | 314          | ---          | Rest                 |
| VF                                              | 0       | 35J    | Yes     | 193 | 27-Oct-2020 | 08:41         | :13                  | 375          | ---          | Rest                 |
| VF                                              | 0       | 35J    | Yes     | 192 | 27-Oct-2020 | 06:43         | :13                  | 286          | 300          | Rest                 |
| VF                                              | 0       | 35J    | Yes     | 191 | 27-Oct-2020 | 06:17         | :14                  | 316          | ---          | Rest                 |
| VT-Mon                                          |         |        |         | 190 | 13-Oct-2020 | 17:33         | :26                  | 136          | 143          | Active               |
| VT-Mon                                          |         |        |         | 189 | 13-Oct-2020 | 17:27         | :17                  | 137          | 140          | Active               |
| VT-Mon                                          |         |        |         | 188 | 13-Oct-2020 | 17:26         | :24                  | 136          | 140          | Active               |
| VT-Mon                                          |         |        |         | 187 | 12-Oct-2020 | 18:16         | :45                  | 138          | 140          | Active               |
| VT-Mon                                          |         |        |         | 186 | 11-Oct-2020 | 17:13         | :06:34               | 146          | 154          | Active               |
| VT-Mon                                          |         |        |         | 185 | 07-Oct-2020 | 17:55         | :09                  | 135          | 140          | Active               |
| VF                                              | 0       | 35J    | Yes     | 184 | 26-Sep-2020 | 07:54         | :13                  | 375          | ---          | Rest                 |
| VT-Mon                                          |         |        |         | 183 | 15-Sep-2020 | 18:15         | :11                  | 135          | 136          | Active               |
| VT-Mon                                          |         |        |         | 182 | 15-Sep-2020 | 18:14         | :26                  | 136          | 140          | Active               |
| VT-Mon                                          |         |        |         | 181 | 15-Sep-2020 | 18:14         | :07                  | 134          | 136          | Active               |
| VT-Mon                                          |         |        |         | 180 | 15-Sep-2020 | 18:06         | :35                  | 147          | 154          | Active               |
| VT-Mon                                          |         |        |         | 179 | 15-Sep-2020 | 17:57         | :37                  | 135          | 136          | Active               |
| VT                                              | 1       |        | Yes     | 164 | 15-Aug-2020 | 18:24         | :08                  | 162          | ---          | Active               |
| SVT-Wavelet                                     |         |        |         | 158 | 11-Aug-2020 | 18:43         | :05                  | 158          | 158          | Active               |
| VT                                              | 1       |        | Yes     | 155 | 01-Aug-2020 | 18:22         | :09                  | 162          | ---          | Active               |
| SVT-Wavelet                                     |         |        |         | 146 | 23-Jul-2020 | 18:35         | :29                  | 162          | 167          | Active               |
| SVT-Wavelet                                     |         |        |         | 145 | 22-Jul-2020 | 18:56         | :07                  | 162          | ---          | Active               |
| SVT-Wavelet                                     |         |        |         | 144 | 21-Jul-2020 | 18:18         | :02:40               | 167          | 167          | Active               |
| VT                                              | 1       |        | Yes     | 141 | 01-Jul-2020 | 18:21         | :03                  | 162          | 162          | Active               |
| SVT-Wavelet                                     |         |        |         | 140 | 01-Jul-2020 | 18:21         | :18                  | 162          | 162          | Active               |
| VT-NS                                           |         |        |         | 138 | 01-Jul-2020 | 01:37         | :02                  | 218          | ---          | Rest                 |
| VF                                              | 0       | 35J    | Yes     | 136 | 25-Jun-2020 | 02:17         | :14                  | 333          | ---          | Rest                 |
| VT-NS                                           |         |        |         | 135 | 25-Jun-2020 | 01:45         | <:01                 | 250          | ---          | Rest                 |
| VF                                              | 0       | 35J    | Yes     | 134 | 22-Jun-2020 | 10:40         | :14                  | 316          | ---          | Rest                 |
| VF                                              | 0       | 35J    | Yes     | 133 | 09-Jun-2020 | 06:35         | :15                  | 400          | ---          | Rest                 |
| VT                                              | 1       |        | Yes     | 130 | 28-May-2020 | 18:16         | :06                  | 162          | ---          | Active               |
| SVT-Wavelet                                     |         |        |         | 129 | 24-May-2020 | 18:09         | :07                  | 162          | ---          | Active               |
| VF                                              | 0       | 35J    | Yes     | 128 | 14-May-2020 | 07:20         | :14                  | 333          | ---          | Rest                 |
| VF                                              | 0       | 35J    | Yes     | 126 | 02-May-2020 | 03:33         | :13                  | 375          | ---          | Rest                 |
| VF                                              | 0       | 35J    | Yes     | 125 | 29-Apr-2020 | 04:23         | :13                  | 353          | ---          | Rest                 |

# Arrhythmia Episode List

 Device: **Evera S VR DVBC3D1**

Serial Number:

 Date of Visit: **23-Nov-2020 21:02:20**

Patient:

ID:

Physician:

| Type         | ATP Seq | Shocks | Success | ID# | Date        | Time<br>hh:mm | Duration<br>hh:mm:ss | Avg bpm<br>V | Max bpm<br>V | Activity at<br>Onset |
|--------------|---------|--------|---------|-----|-------------|---------------|----------------------|--------------|--------------|----------------------|
| VF           | 0       | 35J    | Yes     | 124 | 28-Apr-2020 | 11:43         | :18                  | 353          | 353          | Active               |
| VF           | 0       | 35J    | Yes     | 123 | 28-Apr-2020 | 06:19         | :13                  | 353          | ---          | Rest                 |
| VT-NS        |         |        |         | 122 | 28-Apr-2020 | 06:19         | :01                  | 308          |              | Rest                 |
| VF           | 0       | 35J    | Yes     | 121 | 28-Apr-2020 | 05:42         | :13                  | 316          | 316          | Active               |
| VF           | 0       | 35J    | Yes     | 120 | 28-Apr-2020 | 05:02         | :13                  | 353          | ---          | Rest                 |
| High Rate-NS |         |        |         | 119 | 25-Apr-2020 | 02:02         | :03                  | 283          |              | Active               |
| VF           | 0       | 35J    | Yes     | 118 | 25-Apr-2020 | 01:32         | :12                  | 375          | ---          | Rest                 |
| VF           | 0       | 35J    | Yes     | 117 | 20-Apr-2020 | 00:40         | :14                  | 333          | ---          | Rest                 |
| VF           | 0       | 35J    | Yes     | 116 | 19-Apr-2020 | 03:14         | :14                  | 300          | 300          | Rest                 |
| High Rate-NS |         |        |         | 115 | 15-Apr-2020 | 14:21         | :01                  | 279          |              | Rest                 |
| VF           | 0       | 35J    | Yes     | 114 | 15-Apr-2020 | 11:36         | :12                  | 375          | ---          | Rest                 |
| VF           | 0       | 35J    | Yes     | 113 | 15-Apr-2020 | 11:03         | :13                  | 375          | ---          | Rest                 |
| High Rate-NS |         |        |         | 112 | 15-Apr-2020 | 09:06         | :01                  | 276          |              | Rest                 |
| VF           | 0       | 35J    | Yes     | 111 | 15-Apr-2020 | 08:29         | :12                  | 333          | 353          | Active               |
| VT-NS        |         |        |         | 110 | 14-Apr-2020 | 08:34         | :01                  | 214          |              | Rest                 |
| VF           | 0       | 35J    | Yes     | 109 | 14-Apr-2020 | 01:30         | :13                  | 261          | 300          | Rest                 |
| VT-NS        |         |        |         | 108 | 14-Apr-2020 | 01:30         | :03                  | 317          |              | Rest                 |
| VT-NS        |         |        |         | 107 | 13-Apr-2020 | 07:50         | :01                  | 240          |              | Rest                 |
| VF           | 0       | 35J    | Yes     | 106 | 13-Apr-2020 | 03:15         | :13                  | 353          | ---          | Rest                 |
| VF           | 0       | 35J    | Yes     | 105 | 11-Apr-2020 | 18:26         | :12                  | 400          | ---          | Rest                 |
| VF           | 0       | 35J    | Yes     | 104 | 11-Apr-2020 | 07:46         | :12                  | 333          | ---          | Rest                 |
| VF           | 0       | 35J    | Yes     | 103 | 11-Apr-2020 | 04:30         | :12                  | 375          | ---          | Rest                 |
| VF           | 0       | 35J    | Yes     | 102 | 09-Apr-2020 | 06:16         | :13                  | 353          | ---          | Rest                 |
| VF           | 0       | 35J    | Yes     | 101 | 08-Apr-2020 | 04:51         | :13                  | 333          | ---          | Rest                 |
| VF           | 0       | 35J    | Yes     | 100 | 07-Apr-2020 | 04:04         | :12                  | 333          | 333          | Active               |
| VF           | 0       | 35J    | Yes     | 99  | 07-Apr-2020 | 03:20         | :13                  | 333          | 353          | Rest                 |
| VF           | 0       | 35J    | Yes     | 98  | 04-Apr-2020 | 09:17         | :29                  | 375          | ---          | Rest                 |
| VF           | 0       | 35J    | Yes     | 97  | 04-Apr-2020 | 08:47         | :38                  | 353          | ---          | Rest                 |
| VT-NS        |         |        |         | 96  | 04-Apr-2020 | 08:46         | :02                  | 279          |              | Rest                 |
| VF           | 0       | 35J    | Yes     | 95  | 03-Apr-2020 | 05:40         | :13                  | 375          | ---          | Rest                 |
| VF           | 0       | 35J    | Yes     | 94  | 27-Mar-2020 | 07:42         | :14                  | 353          | ---          | Rest                 |
| VF           | 0       | 35J    | Yes     | 93  | 24-Mar-2020 | 06:23         | :13                  | 300          | 333          | Rest                 |
| VF           | 0       | 35J    | Yes     | 92  | 24-Mar-2020 | 05:31         | :14                  | 316          | 333          | Rest                 |
| VF           | 0       | 35J    | Yes     | 91  | 22-Mar-2020 | 06:24         | :13                  | 300          | 300          | Rest                 |
| VF           | 0       | 35J    | Yes     | 90  | 07-Mar-2020 | 04:50         | :14                  | 333          | ---          | Rest                 |
| High Rate-NS |         |        |         | 89  | 07-Mar-2020 | 04:50         | :02                  | 290          |              | Rest                 |
| VF           | 0       | 35J    | Yes     | 88  | 05-Mar-2020 | 02:23         | :13                  | 375          | ---          | Rest                 |
| VF           | 0       | 35J    | Yes     | 87  | 04-Mar-2020 | 04:53         | :14                  | 333          | ---          | Rest                 |
| VF           | 0       | 35J    | Yes     | 86  | 04-Mar-2020 | 01:32         | :14                  | 316          | 316          | Rest                 |
| VF           | 0       | 35J    | Yes     | 85  | 03-Mar-2020 | 05:48         | :13                  | 353          | 353          | Active               |
| High Rate-NS |         |        |         | 84  | 29-Feb-2020 | 03:11         | :02                  | 283          |              | Rest                 |
| VT-NS        |         |        |         | 83  | 25-Feb-2020 | 10:50         | :01                  | 240          |              | Rest                 |
| VF           | 0       | 35J    | Yes     | 82  | 25-Feb-2020 | 09:46         | :12                  | 333          | 353          | Active               |
| VF           | 0       | 35J    | Yes     | 81  | 25-Feb-2020 | 07:29         | :13                  | 333          | 353          | Rest                 |
| VF           | 0       | 35J    | Yes     | 80  | 03-Nov-2019 | 05:18         | :13                  | 375          | ---          | Rest                 |
| VF           | 0       |        |         | 79  | 22-Oct-2019 | 07:33         | :07                  | 316          | ---          | Rest                 |
| VF           | 0       | 35J    | Yes     | 78  | 21-Oct-2019 | 06:01         | :13                  | 333          | ---          | Rest                 |
| VF           | 0       | 35J    | Yes     | 77  | 19-Oct-2019 | 09:59         | :14                  | 353          | ---          | Rest                 |
| VF           | 0       | 35J    | Yes     | 75  | 23-Sep-2019 | 07:26         | :13                  | 400          | ---          | Rest                 |
| VT           | 9       | 35J    | Yes     | 74  | 10-Sep-2019 | 17:57         | :01:17               | 188          | 188          | Active               |
| SVT-Wavelet  |         |        |         | 73  | 10-Sep-2019 | 17:55         | :10                  | 176          | ---          | Active               |
| SVT-Wavelet  |         |        |         | 72  | 10-Sep-2019 | 17:54         | :18                  | 171          | 171          | Active               |
| VT           | 3       |        | Yes     | 71  | 10-Sep-2019 | 17:53         | :20                  | 182          | 182          | Active               |
| SVT-Wavelet  |         |        |         | 70  | 10-Sep-2019 | 17:51         | :01:41               | 182          | 188          | Active               |
| VT           | 2       |        | Yes     | 69  | 10-Sep-2019 | 17:51         | :10                  | 188          | 188          | Active               |

# Arrhythmia Episode List

 Device: **Evera S VR DVBC3D1**

Serial Number:

 Date of Visit: **23-Nov-2020 21:02:20**

Patient:

ID:

Physician:

| Type        | ATP Seq | Shocks | Success | ID# | Date        | Time<br>hh:mm | Duration<br>hh:mm:ss | Avg bpm<br>V | Max bpm<br>V | Activity at<br>Onset |
|-------------|---------|--------|---------|-----|-------------|---------------|----------------------|--------------|--------------|----------------------|
| SVT-Wavelet |         |        |         | 68  | 10-Sep-2019 | 17:51         | :13                  | 176          | 188          | Active               |
| VT          | 3       |        | Yes     | 67  | 10-Sep-2019 | 17:50         | :18                  | 176          | 176          | Active               |
| SVT-Wavelet |         |        |         | 66  | 10-Sep-2019 | 17:50         | :10                  | 176          | 176          | Active               |
| VT          | 1       |        | Yes     | 65  | 14-Jul-2019 | 12:03         | :11                  | 176          | ---          | Active               |
| VT-NS       |         |        |         | 64  | 14-Jul-2019 | 12:02         | <:01                 | 171          |              | Active               |
| SVT-Wavelet |         |        |         | 63  | 01-Jul-2019 | 12:25         | :10                  | 171          | 171          | Active               |
| VT-NS       |         |        |         | 62  | 07-May-2019 | 09:08         | :03                  | 171          |              | Active               |
| VT          | 1       |        | Yes     | 61  | 07-May-2019 | 09:08         | :10                  | 176          | ---          | Active               |
| VT-NS       |         |        |         | 60  | 30-Apr-2019 | 21:02         | :01                  | 171          |              | Active               |
| VT          | 1       |        | Yes     | 59  | 30-Apr-2019 | 21:00         | :12                  | 176          | 176          | Active               |
| VT          | 2       |        | Yes     | 58  | 30-Apr-2019 | 20:59         | :16                  | 176          | 176          | Active               |
| VT          | 2       |        | Yes     | 57  | 30-Apr-2019 | 20:49         | :17                  | 171          | 171          | Active               |
| VT-NS       |         |        |         | 56  | 30-Apr-2019 | 20:48         | :02                  | 171          |              | Active               |
| VT          | 3       |        | Yes     | 55  | 30-Apr-2019 | 20:47         | :22                  | 171          | 176          | Active               |
| VT-NS       |         |        |         | 54  | 30-Apr-2019 | 20:47         | :03                  | 171          |              | Active               |
| VT          | 2       |        | Yes     | 53  | 30-Apr-2019 | 20:46         | :15                  | 176          | 176          | Active               |
| VT          | 1       |        | Yes     | 52  | 30-Apr-2019 | 20:46         | :13                  | 171          | 171          | Active               |
| VT-NS       |         |        |         | 51  | 30-Apr-2019 | 20:45         | :04                  | 171          |              | Active               |
| VT          | 2       |        | Yes     | 50  | 30-Apr-2019 | 20:40         | :16                  | 176          | ---          | Active               |
| VT          | 1       |        | Yes     | 49  | 30-Apr-2019 | 20:39         | :10                  | 171          | 171          | Active               |
| VT          | 1       |        | Yes     | 48  | 30-Apr-2019 | 20:39         | :11                  | 171          | 171          | Active               |
| VT          | 2       |        | Yes     | 47  | 30-Apr-2019 | 20:24         | :16                  | 171          | 171          | Active               |
| VT          | 2       |        | Yes     | 46  | 30-Apr-2019 | 20:23         | :16                  | 171          | 171          | Active               |
| VT          | 1       |        | Yes     | 45  | 30-Apr-2019 | 20:22         | :12                  | 176          | ---          | Active               |
| VT          | 1       |        | Yes     | 43  | 30-Apr-2019 | 20:21         | :08                  | 171          | 171          | Active               |
| VT          | 3       |        | Yes     | 39  | 03-Dec-2018 | 10:25         | :27                  | 176          | 182          | Active               |
| VT          | 1       |        | Yes     | 37  | 03-Dec-2018 | 10:23         | :13                  | 176          | 176          | Active               |
| VT          | 1       |        | Yes     | 33  | 03-Dec-2018 | 10:20         | :13                  | 176          | ---          | Active               |
| SVT-Wavelet |         |        |         | 32  | 12-Oct-2018 | 10:45         | :12                  | 176          | ---          | Active               |
| SVT-Wavelet |         |        |         | 31  | 12-Oct-2018 | 10:45         | :10                  | 176          | 176          | Active               |
| VF          | 0       | 35J    | Yes     | 30  | 12-Oct-2018 | 08:05         | :14                  | 333          | ---          | Rest                 |
| VF          | 0       | 35J    | Yes     | 29  | 12-Oct-2018 | 05:29         | :13                  | 316          | ---          | Rest                 |
| VF          | 0       | 35J    | Yes     | 28  | 02-Sep-2018 | 07:20         | :13                  | 353          | 353          | Rest                 |
| VF          | 0       | 35J    | Yes     | 27  | 02-Sep-2018 | 06:04         | :13                  | 375          | ---          | Rest                 |
| VF          | 0       | 35J    | Yes     | 26  | 02-Sep-2018 | 05:41         | :13                  | 353          | ---          | Rest                 |
| VF          | 0       | 35J    | Yes     | 25  | 02-Sep-2018 | 04:56         | :13                  | 333          | 375          | Rest                 |
| VF          | 0       | 35J    | Yes     | 24  | 31-Aug-2018 | 05:08         | :13                  | 316          | 316          | Rest                 |
| VF          | 0       | 35J    | Yes     | 23  | 25-Jun-2018 | 03:04         | :12                  | 400          | ---          | Rest                 |
| SVT-Wavelet |         |        |         | 22  | 17-Dec-2017 | 11:32         | :31                  | 171          | 171          | Active               |
| SVT-Wavelet |         |        |         | 20  | 17-Sep-2017 | 03:31         | :25                  | 171          | 171          | Active               |
| SVT-Wavelet |         |        |         | 19  | 17-Sep-2017 | 03:29         | :54                  | 176          | 176          | Active               |
| VF          | 0       | 35J    | Yes     | 17  | 02-Sep-2017 | 06:03         | :12                  | 333          | 333          | Rest                 |
| VF          | 0       | 35J    | Yes     | 16  | 28-Aug-2017 | 07:06         | :12                  | 429          | ---          | Rest                 |
| VF          | 0       | 35J    | Yes     | 15  | 05-Jul-2017 | 07:48         | :13                  | 316          | 316          | Rest                 |
| VF          | 0       | 35J    | Yes     | 14  | 27-Jun-2017 | 10:28         | :13                  | 333          | 333          | Active               |
| VF          | 0       | 35J    | Yes     | 11  | 27-May-2017 | 21:18         | :13                  | 429          | ---          | Rest                 |
| VF          | 0       | 35J    | Yes     | 10  | 17-May-2017 | 06:01         | :14                  | 400          | ---          | Rest                 |
| SVT-Wavelet |         |        |         | 7   | 31-Jan-2017 | 22:32         | :49                  | 176          | 176          | Active               |
| SVT-Wavelet |         |        |         | 6   | 31-Jan-2017 | 16:20         | :21                  | 176          | 176          | Active               |

# Treated VT/VF Episode #209

Device: **Evera S VR DVBC3D1**

Serial Number:

Date of Visit: **23-Nov-2020 21:02:20**

Patient:

ID:

Physician:

| Type | ATP Seq | Shocks | Success | ID# | Date        | Time<br>hh:mm | Duration<br>hh:mm:ss | Avg bpm<br>V | Max bpm<br>V | Activity at<br>Onset |
|------|---------|--------|---------|-----|-------------|---------------|----------------------|--------------|--------------|----------------------|
| VF   | 0       | 35J    | Yes     | 209 | 21-Nov-2020 | 05:47         | :14                  | 353          | ---          | Rest                 |

• V-V      VF = 320 ms      VT = 390 ms

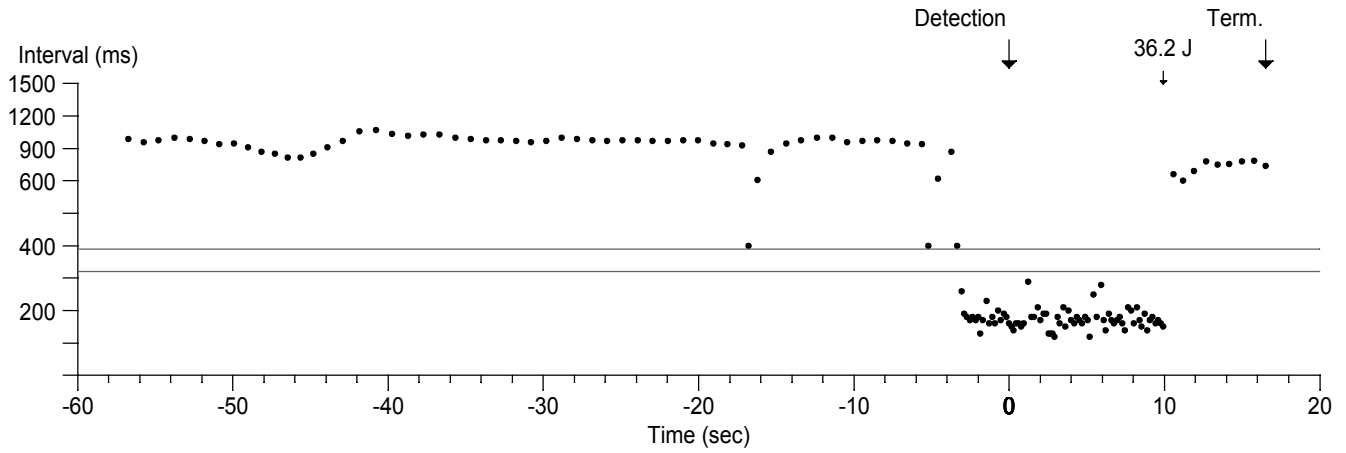





# Treated VT/VF Episode #209

Device: **Evera S VR DVBC3D1**

Serial Number:

Date of Visit: **23-Nov-2020 21:02:20**

Patient:

ID:

**Episode #209 - VF** Chart speed: 25.0 mm/sec

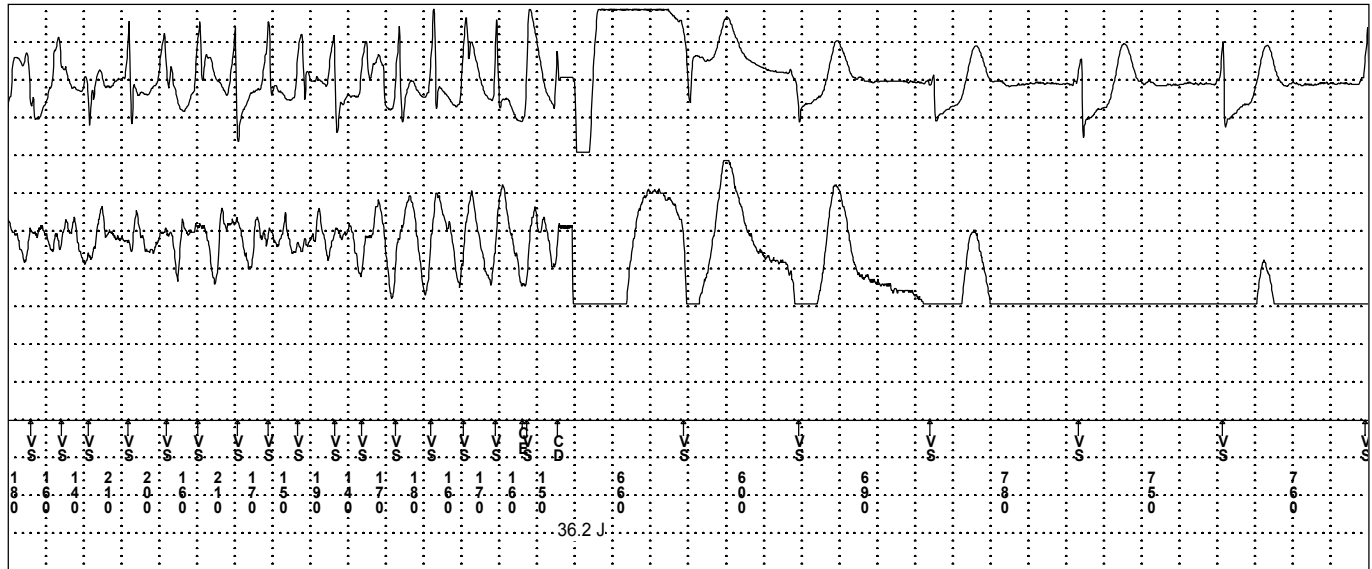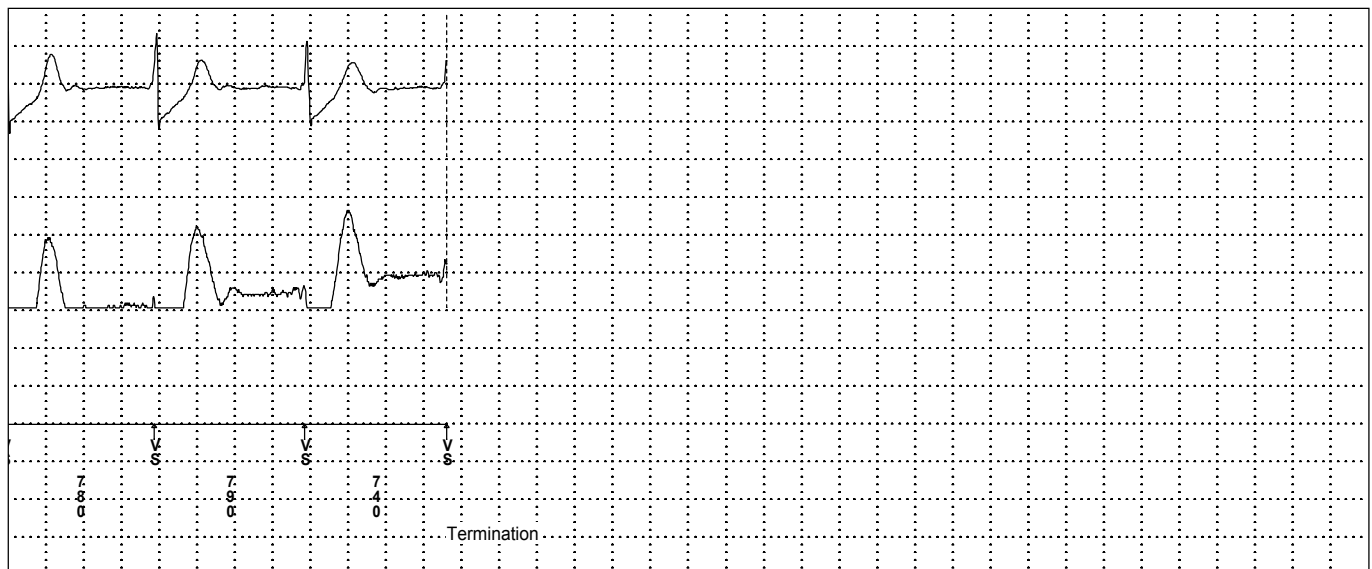

# Treated VT/VF Episode #209

 Device: **Evera S VR DVBC3D1**

Serial Number:

 Date of Visit: **23-Nov-2020 21:02:20**

Patient:

ID:

Physician:

## Episode #209: 21-Nov-2020 05:47:25

### Episode Summary

Initial Type VF (spontaneous)  
 Duration 14 sec  
 V. Max Rate ---  
 V. Median 333 bpm (180 ms)  
 Activity at onset Rest, Sensor = 43 bpm  
 Last Therapy VF Rx1: Defib, Successful

### Initial VT/VF Detection Withheld By

None

### Therapies Delivered Charge Ohms Energy

VF Rx 1 Defib 36.2 J 9.68 sec 48 ohms 0.0 - 35 J

Termination

### Wavelet Measurements Prior to Initial VT/VF Detection

Wavelet Result: Wavelet not applied; interval too fast or too slow  
 Template Status: OK

- 8. No Match --- Interval too fast
- 7. No Match --- Interval too fast
- 6. No Match --- Interval too fast
- 5. No Match --- Interval too fast
- 4. No Match --- Interval too fast
- 3. No Match --- Interval too fast
- 2. No Match --- Interval too fast
- 1. No Match --- Interval too fast
- 0. Detection

### Parameter Settings Initial Redetect V. Interval (Rate)

|         |         |       |      |                  |
|---------|---------|-------|------|------------------|
| VF      | On      | 18/24 | 9/12 | 320 ms (188 bpm) |
| FVT     | Off     |       |      |                  |
| VT      | On      | 16    | 12   | 390 ms (154 bpm) |
| Monitor | Monitor | 32    |      | 450 ms (133 bpm) |

### Wavelet

Wavelet On, Match = 70 %  
 Template 20-Nov-2020, Auto = On  
 SVT V. Limit 260 ms

### Other Enhancements

Stability Off  
 Onset Off  
 High Rate Timeout  
     VF Zone Only 0.75 min  
     All Zones Off  
 TWave On  
 RV Lead Noise On+Timeout  
 Timeout 0.75 min

### Polarity RV

Pace Polarity Bipolar  
 Sense Polarity Bipolar

| EGM            | Source          | Range     | Sensitivity |
|----------------|-----------------|-----------|-------------|
| EGM1           | RVtip to RVring | +/- 8 mV  | RV 0.3 mV   |
| EGM2 (Wavelet) | Can to RVcoil   | +/- 12 mV |             |

# Treated VT/VF Episode #209

Device: **Evera S VR DVBC3D1**

Serial Number:

Date of Visit: **23-Nov-2020 21:02:20**

Patient:

ID:

Physician:

| Type | ATP Seq | Shocks | Success | ID# | Date        | Time<br>hh:mm | Duration<br>hh:mm:ss | Avg bpm<br>V | Max bpm<br>V | Activity at<br>Onset |
|------|---------|--------|---------|-----|-------------|---------------|----------------------|--------------|--------------|----------------------|
| VF   | 0       | 35J    | Yes     | 209 | 21-Nov-2020 | 05:47         | :14                  | 353          | ---          | Rest                 |

No Match ---                      No Match ---                      No Match ---                      No Match ---



6 mV  
 20 ms  
 — QRS  
 - - - - Template

No Match ---                      No Match ---                      No Match ---                      No Match ---



# Lead Trends - RV

Device: **Evera S VR DVBC3D1**

Serial Number:

Date of Visit: **23-Nov-2020 21:02:20**

Patient:

ID:

Physician:

RV Pace Polarity        **Bipolar**  
RV Sense Polarity      **Bipolar**

## RV Impedance (bipolar)

Last Measured 475 ohms

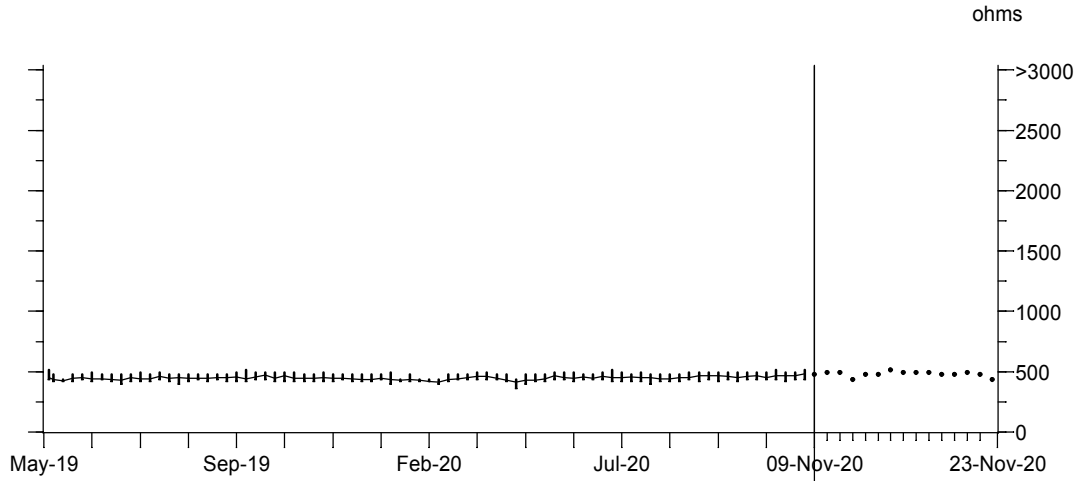

## RV Impedance (tip to coil)

Last Measured 399 ohms

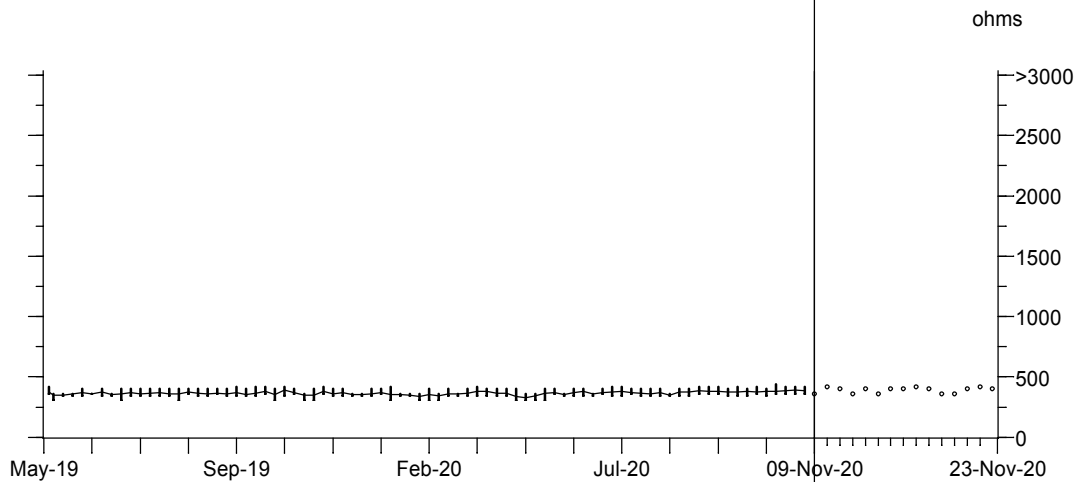

## RV Impedance

————— Bipolar  
- - - - - Tip to Coil

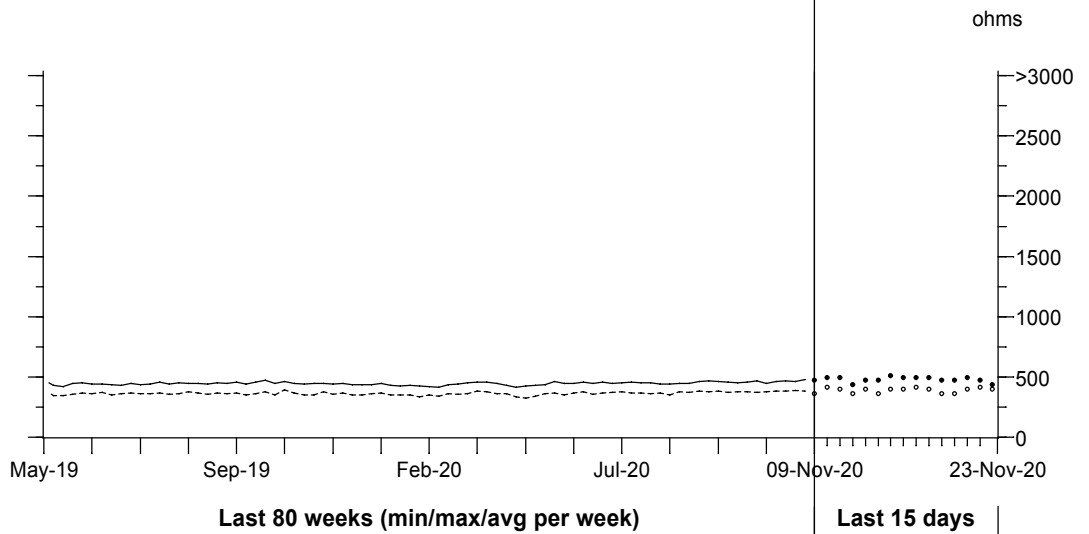

# Lead Trends - RV

Device: **Evera S VR DVBC3D1**

Serial Number:

Date of Visit: **23-Nov-2020 21:02:20**

Patient:

ID:

Physician:

## RV Threshold

Capture Adaptive  
Amplitude 2.00 V  
Pulse Width 0.40 ms  
Last Measured 0.875 V @ 0.40 ms  
Measured On 22-Nov-2020

V @ 0.40 ms



## R-Wave Amplitude

Sensitivity 0.30 mV  
Last Measured 15.1 mV

mV



# Lead Trends - RV

Device: **Evera S VR DVBC3D1**

Serial Number:

Date of Visit: **23-Nov-2020 21:02:20**

Patient:

ID:

Physician:

## RV Defib Impedance

Last Measured 48 ohms

ohms



## SVC Defib Impedance

Last Measured 68 ohms

ohms

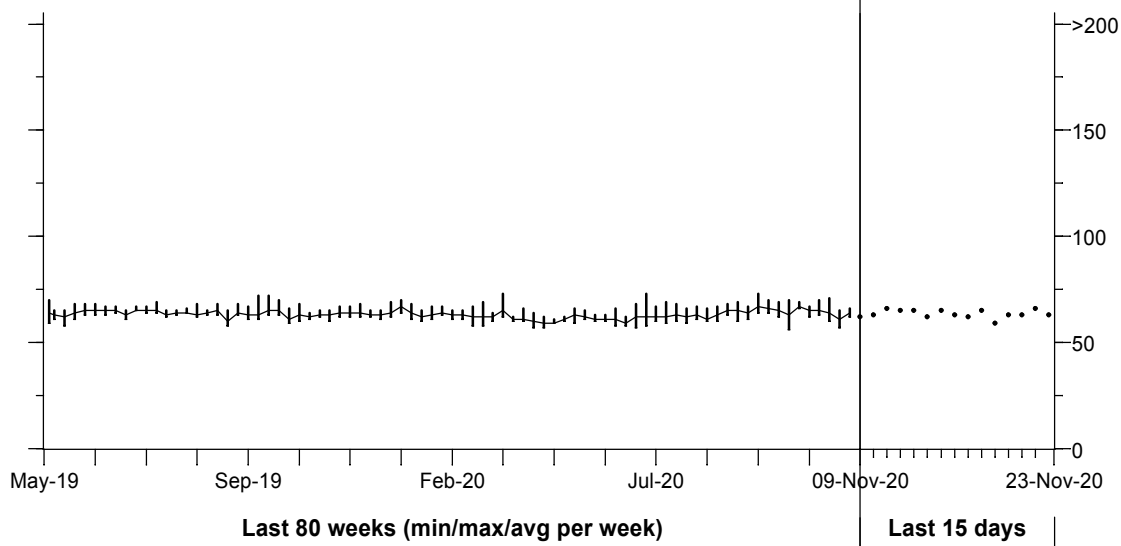

# Battery and Lead Measurements Report

Device: **Evera S VR DVBC3D1**

Serial Number:

Date of Visit: **23-Nov-2020 21:02:20**

Patient:

ID:

Physician:

Last Interrogation: 23-Nov-2020 21:02:20

## **Remaining Longevity** **23-Nov-2020**

Estimated at: Replace Device RRT  
Minimum: Replace Device  
Maximum: Replace Device  
(RRT on 22-Nov-2020)  
(based on initial interrogation)

## **Battery Voltage** **23-Nov-2020**

Voltage 2.72 V  
(RRT=2.73V on 22-Nov-2020)

## **Last Charge** **21-Nov-2020**

Charge Time 9.7 sec  
Energy 0.0 - 35 J

## **Sensing Integrity Counter** **Since 23-Nov-2020**

Short V-V Intervals 0

## **Lead Impedance**

RV Pacing (Bipolar) 475 ohms 23-Nov-2020  
RV Defib 48 ohms 23-Nov-2020  
SVC Defib 68 ohms 23-Nov-2020

## **Sensing**

R-Wave Amplitude 15.1 mV 23-Nov-2020

## **Last High Voltage Therapy** **21-Nov-2020**

Measured Impedance 48 ohms  
Delivered Energy 36 J  
Waveform Biphasic  
Pathway B>AX

# Parameters

Device: **Evera S VR DVBC3D1**

Serial Number:

Date of Visit: **23-Nov-2020 21:02:20**

Patient:

ID:

Physician:

## Pacing Summary

| Mode     | Rates        |
|----------|--------------|
| Mode VVI | Lower 40 bpm |

| Pacing Details         | RV          |
|------------------------|-------------|
| Amplitude              | 2.00 V      |
| Pulse Width            | 0.40 ms     |
| Capture Management     | Adaptive    |
| Amplitude Margin       | 2.0 X       |
| Min. Adapted Amplitude | 2.00 V      |
| Acute Phase Remaining  | Off         |
| Acute Phase Completed  | 23-Aug-2016 |
| Sensitivity            | 0.30 mV     |
| Pace Polarity          | Bipolar     |
| Sense Polarity         | Bipolar     |

## Refractory/Blanking

|                  |        |
|------------------|--------|
| V. Blank Post VP | 200 ms |
| V. Blank Post VS | 120 ms |

## Arrhythmia Interventions

|                       |     |
|-----------------------|-----|
| V. Rate Stabilization | Off |
|-----------------------|-----|

## Post Shock Pacing

|                                          |         |
|------------------------------------------|---------|
| Post Shock Pacing*                       |         |
| V. Amplitude                             | 6 V     |
| V. Pulse Width                           | 1.50 ms |
| * Settings for first 25 beats post shock |         |
| Post VT/VF Shock Pacing                  | Off     |

## Additional Features

|                 |     |
|-----------------|-----|
| Rate Hysteresis | Off |
| Sleep           | Off |

## Device Information

|        |           |                    |                        |
|--------|-----------|--------------------|------------------------|
| Device | Medtronic | Evera S VR DVBC3D1 | Implanted: 25-Apr-2016 |
|--------|-----------|--------------------|------------------------|



# Parameters

 Device: **Evera S VR DVBC3D1**

Serial Number:

 Date of Visit: **23-Nov-2020 21:02:20**

Patient:

ID:

Physician:

**VT/VF Detection**

|         |         | V. Interval (Rate) | Initial | Redetect |                                                                                                 |
|---------|---------|--------------------|---------|----------|-------------------------------------------------------------------------------------------------|
| VF      | On      | 320 ms (188 bpm)   | 18/24   | 9/12     |  320 ms        |
| FVT     | OFF     |                    |         |          |                                                                                                 |
| VT      | On      | 390 ms (154 bpm)   | 16      | 12       |  390 ms        |
| Monitor | Monitor | 450 ms (133 bpm)   | 32      |          | No Rx  450 ms |

| Wavelet         |             | Other Enhancements | Sensitivity |
|-----------------|-------------|--------------------|-------------|
| Wavelet         | On          | Stability          | Off         |
| Template        | 22-Nov-2020 | Onset              | Off         |
| Match Threshold | 70 %        | High Rate Timeout  |             |
| Auto Collection | On          | VF Zone Only       | 0.75 min    |
| SVT V. Limit    | 260 ms      | All Zones          | Off         |
|                 |             | TWave              | On          |
|                 |             | RV Lead Noise      | On+Timeout  |
|                 |             | Timeout            | 0.75 min    |

| VF Therapies      | Rx1  | Rx2  | Rx3  | Rx4  | Rx5  | Rx6  |
|-------------------|------|------|------|------|------|------|
| VF Therapy Status | On   | On   | On   | On   | On   | On   |
| Energy            | 35 J |
| Pathway           | B>AX | AX>B | B>AX | AX>B | B>AX | AX>B |

ATP During Charging

Deliver ATP if last 8 R-R &gt;= 240 ms, Burst, Pulses = 8, R-S1 = 88 %, Decrement = 10 ms

ChargeSaver = On(1 episodes), SmartMode = On

| FVT Therapies      | Rx1 | Rx2 | Rx3 | Rx4 | Rx5 | Rx6 |
|--------------------|-----|-----|-----|-----|-----|-----|
| FVT Therapy Status | Off | Off | Off | Off | Off | Off |

| VT Therapies        | Rx1   | Rx2   | Rx3   | Rx4  | Rx5  | Rx6  |
|---------------------|-------|-------|-------|------|------|------|
| VT Therapy Status   | On    | On    | On    | On   | On   | On   |
| Therapy Type        | Burst | Ramp  | Ramp+ | CV   | CV   | CV   |
| Energy              |       |       |       | 35 J | 35 J | 35 J |
| Pathway             |       |       |       | B>AX | AX>B | AX>B |
| Initial # Pulses    | 8     | 8     | 3     |      |      |      |
| R-S1 Interval=(%RR) | 88 %  | 91 %  | 75 %  |      |      |      |
| S1S2(Ramp+)=(%RR)   |       |       | 69 %  |      |      |      |
| S2SN(Ramp+)=(%RR)   |       |       | 66 %  |      |      |      |
| Interval Dec        | 10 ms | 10 ms |       |      |      |      |
| # Sequences         | 3     | 3     | 3     |      |      |      |
| Smart Mode          | Off   | Off   | Off   |      |      |      |

**Shared V. ATP**

|                          |        |
|--------------------------|--------|
| V-V Minimum ATP Interval | 200 ms |
| V. Amplitude             | 8 V    |
| V. Pulse Width           | 1.5 ms |
| V. Pace Blanking         | 240 ms |

**Shared V. Therapies**

|                               |            |
|-------------------------------|------------|
| Active Can/SVC Coil           | Can+SVC On |
| Progressive Episode Therapies | Off        |
| Confirmation+                 | On         |

# Parameters

Device: **Evera S VR DVBC3D1**

Serial Number:

Date of Visit: **23-Nov-2020 21:02:20**

Patient:

ID:

Physician:

## Data Collection Setup

|                    | Source            | Range     |
|--------------------|-------------------|-----------|
| LECG               | Can to SVC        | +/- 2 mV  |
| EGM 1              | RVtip to RVring   | +/- 8 mV  |
| EGM 2 (Wavelet)    | Can to RVcoil     | +/- 12 mV |
| EGM 3              | RVtip to RVcoil   | +/- 8 mV  |
| Monitored          | EGM1 and EGM2     |           |
| Pre-arrhythmia EGM | Off               |           |
| Device Date/Time   | 23-Nov-2020 21:05 |           |
| Holter Telemetry   | Off               |           |

## Medtronic CareAlert Setup

Patient Home Monitor No  
Alert Time 08:00

| Alert Conditions                              | Enable-Urgency<br>Tone | Threshold          |
|-----------------------------------------------|------------------------|--------------------|
| Number of Shocks Delivered in an Episode      | Off                    |                    |
| All Therapies in a Zone Exhausted             | Off                    |                    |
| RV Lead Integrity                             | On-High                |                    |
| RV Lead Noise                                 | On-High                |                    |
| RV Pacing Lead Impedance Out of Range         | On-High                | <200 or >3000 ohms |
| RV Defibrillation Lead Impedance Out of Range | On-High                | <20 or >200 ohms   |
| SVC Defib Lead Impedance Out of Range         | On-High                | <20 or >200 ohms   |
| Low Battery Voltage RRT                       | On-High                | 2.73 V(RRT)        |
| Excessive Charge Time EOS                     | On-High                |                    |
| VF Detection OFF, 3+ VF or 3+ FVT Rx Off.     | On-High                |                    |

## Changes This Session

Device: **Evera S VR DVBC3D1**

Serial Number:

Date of Visit: **23-Nov-2020 21:02:20**

Patient:

ID:

Physician:

---

| <b>Parameter</b> | <b>Session Start</b> | <b>Current Value</b> |
|------------------|----------------------|----------------------|
|------------------|----------------------|----------------------|

---

No parameters have been changed during the current session.

# Patient Information Report

Device: **Evera S VR DVBC3D1**

Serial Number:

Date of Visit: **23-Nov-2020 21:02:20**

Patient:

ID:

Physician:

---

## Patient Identification

Patient

ID

Date of Birth

---

## History

VT/VF

Slowest VT

Atrial Status

AV Conduction

Heart Failure

Activity Level

EF, on

---

---

## Physician Information

Physician

Phone

Hospital

Last Update 03-Sep-2020

---

## Leads

Lead 1

Lead Model

Lead Position

Manufacturer

Serial Number

Implant Date

Lead 2

Lead Model

Lead Position

Manufacturer

Serial Number

Implant Date

Lead 3

Lead Model

Lead Position

Manufacturer

Serial Number

Implant Date

---

## Implant

Implant Date 25-Apr-2016

Defibrillation Energy ---

HV Impedance (ohms)

**RV**

---

R Wave Amplitude (mV)

Slew Rate ---

Pacing Threshold Amp. ---

Pulse Width Setting ---

Pacing Impedance (ohms)

Threshold Current (mA)

Notes:



# Session Summary

Device: **Evera S VR DVBC3D1**

Serial Number:

Date of Visit: **23-Nov-2020 21:14:00**

Patient:

ID:

Physician:

## Device Information

Device Medtronic Evera S VR DVBC3D1 Implanted: 25-Apr-2016

## Device Status (Implanted: 25-Apr-2016)

Remaining Longevity Replace Device RRT (23-Nov-2020)  
(RRT on 22-Nov-2020)  
(based on initial interrogation)

### RV

### SVC

Pacing Impedance 475 ohms  
Defibrillation Impedance RV=48 ohms  
SVC=68 ohms  
  
Pace Polarity Bipolar  
Capture Threshold 0.875 V @ 0.40 ms  
Measured On 22-Nov-2020  
Programmed Amplitude/Pulse Width 2.00 V / 0.40 ms  
  
Measured R Wave 15.1 mV  
Programmed Sensitivity 0.30 mV

## Parameter Summary

Mode VVI Lower Rate 40 bpm

### Detection

VF On  
FVT OFF  
VT On

### Rates

>188 bpm  
  
154-188 bpm

### Therapies

ATP During Charging, 35J x 6  
All Rx Off  
Burst(3), Ramp(3), Ramp+(3), 35J x 3

Enhancements On: VT Monitor, Wavelet, High Rate Timeout, TWave, Noise(Timeout)

## Changes This Session

Session Start Current Value

No parameters have been changed during the current session.

# Rate Histograms

Device: **Evera S VR DVBC3D1**

Serial Number:

Date of Visit: **23-Nov-2020 21:14:00**

Patient:

ID:

Physician:

### Prior to Last Session

03-Sep-2020 to 23-Nov-2020

81 days

### Since Last Session

23-Nov-2020 to 23-Nov-2020

11 hours

|           |           |         |           |         |
|-----------|-----------|---------|-----------|---------|
| % of Time | <b>VS</b> | 100.0 % | <b>VS</b> | 100.0 % |
|           | <b>VP</b> | < 0.1%  | <b>VP</b> | 0.0 %   |

### Ventricular

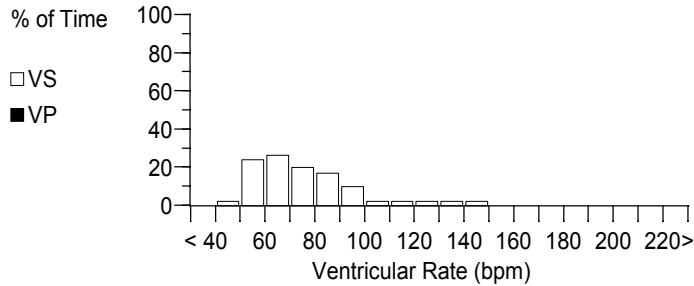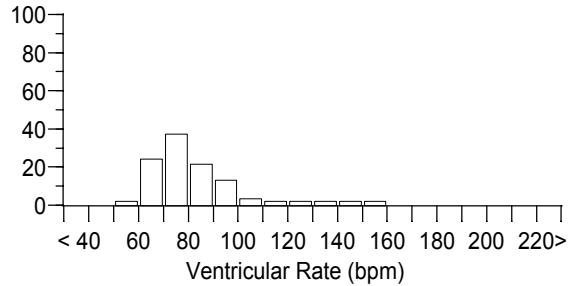

# Cardiac Compass Report

Device: **Evera S VR DVBC3D1**

Serial Number:

Date of Visit: **23-Nov-2020 21:14:00**

Patient:

ID:

Physician:





# VT/VF Counters

Device: **Evera S VR DVBC3D1**

Serial Number:

Date of Visit: **23-Nov-2020 21:14:00**

Patient:

ID:

Physician:

| Prior Session                 | Last Session                  | Device Lifetime                     |
|-------------------------------|-------------------------------|-------------------------------------|
| 03-Sep-2020 to<br>23-Nov-2020 | 23-Nov-2020 to<br>23-Nov-2020 | <b>Total</b><br>(Since 25-Apr-2016) |
| 81 days                       | 11 hours                      | 55 months                           |

### VT/VF Counters

| VT/VF Counters               | Prior Session | Last Session | Device Lifetime |
|------------------------------|---------------|--------------|-----------------|
| VF                           | 15            | 0 ↓          | 79              |
| FVT                          | 0             | 0            | 0               |
| VT                           | 1             | 0 ↓          | 27              |
| Monitored VT (133 - 154 bpm) | 22            | 0 ↓          |                 |
| VT-NS (>4 beats, >154 bpm)   | 1             | 0 ↓          |                 |
| High Rate-NS                 | 0             | 0            |                 |
| PVC Runs (2-4 beats)         | 3.2 per hour  | NA*          |                 |
| PVC Singles                  | 0.8 per hour  | NA*          |                 |
| Runs of VRS Paces            | 0.0 per hour  | NA*          |                 |
| Single VRS Paces             | 0.0 per hour  | NA*          |                 |

\*NA: Session duration less than 1 day.

### SVT: VT/VF Rx Withheld

|              |   |   |    |
|--------------|---|---|----|
| Wavelet      | 0 | 0 | 19 |
| V. Stability | 0 | 0 | 0  |
| Onset        | 0 | 0 | 0  |

### V. Oversensing: VT/VF Rx Withheld

|                      |   |   |   |
|----------------------|---|---|---|
| V. Oversensing-TWave | 0 | 0 | 0 |
| V. Oversensing-Noise | 0 | 0 | 0 |

### VT/VF Therapy Summary

|                    |          |   |          |
|--------------------|----------|---|----------|
| Pace-terminated    | 1 of 1   | 0 | 26 of 27 |
| Shock-terminated   | 15 of 15 | 0 | 79 of 79 |
| Total VT/VF Shocks | 15       | 0 | 79       |
| Aborted Charges    | 0        | 0 | 1        |

### VT/VF Therapy Efficacy Since Last Session 23-Nov-2020 to 23-Nov-2020

| VF Therapy | ATP+Chg | 35 J |
|------------|---------|------|------|------|------|------|------|
| Delivered  | 0       | 0    | 0    | 0    | 0    | 0    | 0    |
| Successful | 0       | 0    | 0    | 0    | 0    | 0    | 0    |

### FVT Therapy Off

| VT Therapy  | Burst | Ramp | Ramp+ | 35 J | 35 J | 35 J |
|-------------|-------|------|-------|------|------|------|
| Delivered   | 0     | 0    | 0     | 0    | 0    | 0    |
| Successful  | 0     | 0    | 0     | 0    | 0    | 0    |
| Accelerated | 0     | 0    | 0     | 0    | 0    | 0    |

# Arrhythmia Episode List

 Device: **Evera S VR DVBC3D1**

Serial Number:

 Date of Visit: **23-Nov-2020 21:14:00**

Patient:

ID:

Physician:

**Arrhythmia Episode List:** 25-Apr-2016 20:45:20 to 23-Nov-2020 21:14:00

All collected episodes.

| Type                                            | ATP Seq | Shocks | Success | ID# | Date        | Time<br>hh:mm | Duration<br>hh:mm:ss | Avg bpm<br>V | Max bpm<br>V | Activity at<br>Onset |
|-------------------------------------------------|---------|--------|---------|-----|-------------|---------------|----------------------|--------------|--------------|----------------------|
| (No data since last session.)                   |         |        |         |     |             |               |                      |              |              |                      |
| ----- Last Programmer Session 23-Nov-2020 ----- |         |        |         |     |             |               |                      |              |              |                      |
| VT-Mon                                          |         |        |         | 210 | 22-Nov-2020 | 22:11         | :17                  | 137          | 140          | Active               |
| VF                                              | 0       | 35J    | Yes     | 209 | 21-Nov-2020 | 05:47         | :14                  | 353          | ---          | Rest                 |
| VF                                              | 0       | 35J    | Yes     | 208 | 19-Nov-2020 | 06:31         | :14                  | 353          | ---          | Rest                 |
| VF                                              | 0       | 35J    | Yes     | 207 | 19-Nov-2020 | 05:00         | :14                  | 353          | ---          | Rest                 |
| VF                                              | 0       | 35J    | Yes     | 206 | 17-Nov-2020 | 09:16         | :14                  | 300          | 316          | Rest                 |
| VF                                              | 0       | 35J    | Yes     | 205 | 15-Nov-2020 | 08:00         | :14                  | 286          | 300          | Rest                 |
| VF                                              | 0       | 35J    | Yes     | 204 | 13-Nov-2020 | 05:49         | :14                  | 316          | 333          | Rest                 |
| VT-Mon                                          |         |        |         | 203 | 12-Nov-2020 | 10:20         | :01:13               | 144          | 154          | Active               |
| VT                                              | 1       |        | Yes     | 202 | 12-Nov-2020 | 10:20         | :08                  | 158          | 158          | Active               |
| VT-Mon                                          |         |        |         | 201 | 12-Nov-2020 | 10:19         | :22                  | 154          | 158          | Active               |
| VF                                              | 0       | 35J    | Yes     | 200 | 09-Nov-2020 | 04:50         | :13                  | 353          | ---          | Rest                 |
| VF                                              | 0       | 35J    | Yes     | 199 | 06-Nov-2020 | 05:06         | :15                  | 333          | ---          | Rest                 |
| VT-Mon                                          |         |        |         | 198 | 01-Nov-2020 | 12:21         | :07                  | 135          | 136          | Active               |
| VF                                              | 0       | 35J    | Yes     | 197 | 01-Nov-2020 | 04:57         | :14                  | 316          | ---          | Rest                 |
| VF                                              | 0       | 35J    | Yes     | 196 | 29-Oct-2020 | 06:50         | :14                  | 333          | 333          | Rest                 |
| VF                                              | 0       | 35J    | Yes     | 195 | 29-Oct-2020 | 05:56         | :14                  | 333          | ---          | Rest                 |
| VT-NS                                           |         |        |         | 194 | 29-Oct-2020 | 05:56         | :02                  | 314          | ---          | Rest                 |
| VF                                              | 0       | 35J    | Yes     | 193 | 27-Oct-2020 | 08:41         | :13                  | 375          | ---          | Rest                 |
| VF                                              | 0       | 35J    | Yes     | 192 | 27-Oct-2020 | 06:43         | :13                  | 286          | 300          | Rest                 |
| VF                                              | 0       | 35J    | Yes     | 191 | 27-Oct-2020 | 06:17         | :14                  | 316          | ---          | Rest                 |
| VT-Mon                                          |         |        |         | 190 | 13-Oct-2020 | 17:33         | :26                  | 136          | 143          | Active               |
| VT-Mon                                          |         |        |         | 189 | 13-Oct-2020 | 17:27         | :17                  | 137          | 140          | Active               |
| VT-Mon                                          |         |        |         | 188 | 13-Oct-2020 | 17:26         | :24                  | 136          | 140          | Active               |
| VT-Mon                                          |         |        |         | 187 | 12-Oct-2020 | 18:16         | :45                  | 138          | 140          | Active               |
| VT-Mon                                          |         |        |         | 186 | 11-Oct-2020 | 17:13         | :06:34               | 146          | 154          | Active               |
| VT-Mon                                          |         |        |         | 185 | 07-Oct-2020 | 17:55         | :09                  | 135          | 140          | Active               |
| VF                                              | 0       | 35J    | Yes     | 184 | 26-Sep-2020 | 07:54         | :13                  | 375          | ---          | Rest                 |
| VT-Mon                                          |         |        |         | 183 | 15-Sep-2020 | 18:15         | :11                  | 135          | 136          | Active               |
| VT-Mon                                          |         |        |         | 182 | 15-Sep-2020 | 18:14         | :26                  | 136          | 140          | Active               |
| VT-Mon                                          |         |        |         | 181 | 15-Sep-2020 | 18:14         | :07                  | 134          | 136          | Active               |
| VT-Mon                                          |         |        |         | 180 | 15-Sep-2020 | 18:06         | :35                  | 147          | 154          | Active               |
| VT-Mon                                          |         |        |         | 179 | 15-Sep-2020 | 17:57         | :37                  | 135          | 136          | Active               |
| VT                                              | 1       |        | Yes     | 164 | 15-Aug-2020 | 18:24         | :08                  | 162          | ---          | Active               |
| SVT-Wavelet                                     |         |        |         | 158 | 11-Aug-2020 | 18:43         | :05                  | 158          | 158          | Active               |
| VT                                              | 1       |        | Yes     | 155 | 01-Aug-2020 | 18:22         | :09                  | 162          | ---          | Active               |
| SVT-Wavelet                                     |         |        |         | 146 | 23-Jul-2020 | 18:35         | :29                  | 162          | 167          | Active               |
| SVT-Wavelet                                     |         |        |         | 145 | 22-Jul-2020 | 18:56         | :07                  | 162          | ---          | Active               |
| SVT-Wavelet                                     |         |        |         | 144 | 21-Jul-2020 | 18:18         | :02:40               | 167          | 167          | Active               |
| VT                                              | 1       |        | Yes     | 141 | 01-Jul-2020 | 18:21         | :03                  | 162          | 162          | Active               |
| SVT-Wavelet                                     |         |        |         | 140 | 01-Jul-2020 | 18:21         | :18                  | 162          | 162          | Active               |
| VT-NS                                           |         |        |         | 138 | 01-Jul-2020 | 01:37         | :02                  | 218          | ---          | Rest                 |
| VF                                              | 0       | 35J    | Yes     | 136 | 25-Jun-2020 | 02:17         | :14                  | 333          | ---          | Rest                 |
| VT-NS                                           |         |        |         | 135 | 25-Jun-2020 | 01:45         | <:01                 | 250          | ---          | Rest                 |
| VF                                              | 0       | 35J    | Yes     | 134 | 22-Jun-2020 | 10:40         | :14                  | 316          | ---          | Rest                 |
| VF                                              | 0       | 35J    | Yes     | 133 | 09-Jun-2020 | 06:35         | :15                  | 400          | ---          | Rest                 |
| VT                                              | 1       |        | Yes     | 130 | 28-May-2020 | 18:16         | :06                  | 162          | ---          | Active               |
| SVT-Wavelet                                     |         |        |         | 129 | 24-May-2020 | 18:09         | :07                  | 162          | ---          | Active               |
| VF                                              | 0       | 35J    | Yes     | 128 | 14-May-2020 | 07:20         | :14                  | 333          | ---          | Rest                 |
| VF                                              | 0       | 35J    | Yes     | 126 | 02-May-2020 | 03:33         | :13                  | 375          | ---          | Rest                 |
| VF                                              | 0       | 35J    | Yes     | 125 | 29-Apr-2020 | 04:23         | :13                  | 353          | ---          | Rest                 |

# Arrhythmia Episode List

 Device: **Evera S VR DVBC3D1**

Serial Number:

 Date of Visit: **23-Nov-2020 21:14:00**

Patient:

ID:

Physician:

| Type         | ATP Seq | Shocks | Success | ID# | Date        | Time<br>hh:mm | Duration<br>hh:mm:ss | Avg bpm<br>V | Max bpm<br>V | Activity at<br>Onset |
|--------------|---------|--------|---------|-----|-------------|---------------|----------------------|--------------|--------------|----------------------|
| VF           | 0       | 35J    | Yes     | 124 | 28-Apr-2020 | 11:43         | :18                  | 353          | 353          | Active               |
| VF           | 0       | 35J    | Yes     | 123 | 28-Apr-2020 | 06:19         | :13                  | 353          | ---          | Rest                 |
| VT-NS        |         |        |         | 122 | 28-Apr-2020 | 06:19         | :01                  | 308          |              | Rest                 |
| VF           | 0       | 35J    | Yes     | 121 | 28-Apr-2020 | 05:42         | :13                  | 316          | 316          | Active               |
| VF           | 0       | 35J    | Yes     | 120 | 28-Apr-2020 | 05:02         | :13                  | 353          | ---          | Rest                 |
| High Rate-NS |         |        |         | 119 | 25-Apr-2020 | 02:02         | :03                  | 283          |              | Active               |
| VF           | 0       | 35J    | Yes     | 118 | 25-Apr-2020 | 01:32         | :12                  | 375          | ---          | Rest                 |
| VF           | 0       | 35J    | Yes     | 117 | 20-Apr-2020 | 00:40         | :14                  | 333          | ---          | Rest                 |
| VF           | 0       | 35J    | Yes     | 116 | 19-Apr-2020 | 03:14         | :14                  | 300          | 300          | Rest                 |
| High Rate-NS |         |        |         | 115 | 15-Apr-2020 | 14:21         | :01                  | 279          |              | Rest                 |
| VF           | 0       | 35J    | Yes     | 114 | 15-Apr-2020 | 11:36         | :12                  | 375          | ---          | Rest                 |
| VF           | 0       | 35J    | Yes     | 113 | 15-Apr-2020 | 11:03         | :13                  | 375          | ---          | Rest                 |
| High Rate-NS |         |        |         | 112 | 15-Apr-2020 | 09:06         | :01                  | 276          |              | Rest                 |
| VF           | 0       | 35J    | Yes     | 111 | 15-Apr-2020 | 08:29         | :12                  | 333          | 353          | Active               |
| VT-NS        |         |        |         | 110 | 14-Apr-2020 | 08:34         | :01                  | 214          |              | Rest                 |
| VF           | 0       | 35J    | Yes     | 109 | 14-Apr-2020 | 01:30         | :13                  | 261          | 300          | Rest                 |
| VT-NS        |         |        |         | 108 | 14-Apr-2020 | 01:30         | :03                  | 317          |              | Rest                 |
| VT-NS        |         |        |         | 107 | 13-Apr-2020 | 07:50         | :01                  | 240          |              | Rest                 |
| VF           | 0       | 35J    | Yes     | 106 | 13-Apr-2020 | 03:15         | :13                  | 353          | ---          | Rest                 |
| VF           | 0       | 35J    | Yes     | 105 | 11-Apr-2020 | 18:26         | :12                  | 400          | ---          | Rest                 |
| VF           | 0       | 35J    | Yes     | 104 | 11-Apr-2020 | 07:46         | :12                  | 333          | ---          | Rest                 |
| VF           | 0       | 35J    | Yes     | 103 | 11-Apr-2020 | 04:30         | :12                  | 375          | ---          | Rest                 |
| VF           | 0       | 35J    | Yes     | 102 | 09-Apr-2020 | 06:16         | :13                  | 353          | ---          | Rest                 |
| VF           | 0       | 35J    | Yes     | 101 | 08-Apr-2020 | 04:51         | :13                  | 333          | ---          | Rest                 |
| VF           | 0       | 35J    | Yes     | 100 | 07-Apr-2020 | 04:04         | :12                  | 333          | 333          | Active               |
| VF           | 0       | 35J    | Yes     | 99  | 07-Apr-2020 | 03:20         | :13                  | 333          | 353          | Rest                 |
| VF           | 0       | 35J    | Yes     | 98  | 04-Apr-2020 | 09:17         | :29                  | 375          | ---          | Rest                 |
| VF           | 0       | 35J    | Yes     | 97  | 04-Apr-2020 | 08:47         | :38                  | 353          | ---          | Rest                 |
| VT-NS        |         |        |         | 96  | 04-Apr-2020 | 08:46         | :02                  | 279          |              | Rest                 |
| VF           | 0       | 35J    | Yes     | 95  | 03-Apr-2020 | 05:40         | :13                  | 375          | ---          | Rest                 |
| VF           | 0       | 35J    | Yes     | 94  | 27-Mar-2020 | 07:42         | :14                  | 353          | ---          | Rest                 |
| VF           | 0       | 35J    | Yes     | 93  | 24-Mar-2020 | 06:23         | :13                  | 300          | 333          | Rest                 |
| VF           | 0       | 35J    | Yes     | 92  | 24-Mar-2020 | 05:31         | :14                  | 316          | 333          | Rest                 |
| VF           | 0       | 35J    | Yes     | 91  | 22-Mar-2020 | 06:24         | :13                  | 300          | 300          | Rest                 |
| VF           | 0       | 35J    | Yes     | 90  | 07-Mar-2020 | 04:50         | :14                  | 333          | ---          | Rest                 |
| High Rate-NS |         |        |         | 89  | 07-Mar-2020 | 04:50         | :02                  | 290          |              | Rest                 |
| VF           | 0       | 35J    | Yes     | 88  | 05-Mar-2020 | 02:23         | :13                  | 375          | ---          | Rest                 |
| VF           | 0       | 35J    | Yes     | 87  | 04-Mar-2020 | 04:53         | :14                  | 333          | ---          | Rest                 |
| VF           | 0       | 35J    | Yes     | 86  | 04-Mar-2020 | 01:32         | :14                  | 316          | 316          | Rest                 |
| VF           | 0       | 35J    | Yes     | 85  | 03-Mar-2020 | 05:48         | :13                  | 353          | 353          | Active               |
| High Rate-NS |         |        |         | 84  | 29-Feb-2020 | 03:11         | :02                  | 283          |              | Rest                 |
| VT-NS        |         |        |         | 83  | 25-Feb-2020 | 10:50         | :01                  | 240          |              | Rest                 |
| VF           | 0       | 35J    | Yes     | 82  | 25-Feb-2020 | 09:46         | :12                  | 333          | 353          | Active               |
| VF           | 0       | 35J    | Yes     | 81  | 25-Feb-2020 | 07:29         | :13                  | 333          | 353          | Rest                 |
| VF           | 0       | 35J    | Yes     | 80  | 03-Nov-2019 | 05:18         | :13                  | 375          | ---          | Rest                 |
| VF           | 0       |        |         | 79  | 22-Oct-2019 | 07:33         | :07                  | 316          | ---          | Rest                 |
| VF           | 0       | 35J    | Yes     | 78  | 21-Oct-2019 | 06:01         | :13                  | 333          | ---          | Rest                 |
| VF           | 0       | 35J    | Yes     | 77  | 19-Oct-2019 | 09:59         | :14                  | 353          | ---          | Rest                 |
| VF           | 0       | 35J    | Yes     | 75  | 23-Sep-2019 | 07:26         | :13                  | 400          | ---          | Rest                 |
| VT           | 9       | 35J    | Yes     | 74  | 10-Sep-2019 | 17:57         | :01:17               | 188          | 188          | Active               |
| SVT-Wavelet  |         |        |         | 73  | 10-Sep-2019 | 17:55         | :10                  | 176          | ---          | Active               |
| SVT-Wavelet  |         |        |         | 72  | 10-Sep-2019 | 17:54         | :18                  | 171          | 171          | Active               |
| VT           | 3       |        | Yes     | 71  | 10-Sep-2019 | 17:53         | :20                  | 182          | 182          | Active               |
| SVT-Wavelet  |         |        |         | 70  | 10-Sep-2019 | 17:51         | :01:41               | 182          | 188          | Active               |
| VT           | 2       |        | Yes     | 69  | 10-Sep-2019 | 17:51         | :10                  | 188          | 188          | Active               |

# Arrhythmia Episode List

 Device: **Evera S VR DVBC3D1**

Serial Number:

 Date of Visit: **23-Nov-2020 21:14:00**

Patient:

ID:

Physician:

| Type        | ATP Seq | Shocks | Success | ID# | Date        | Time<br>hh:mm | Duration<br>hh:mm:ss | Avg bpm<br>V | Max bpm<br>V | Activity at<br>Onset |
|-------------|---------|--------|---------|-----|-------------|---------------|----------------------|--------------|--------------|----------------------|
| SVT-Wavelet |         |        |         | 68  | 10-Sep-2019 | 17:51         | :13                  | 176          | 188          | Active               |
| VT          | 3       |        | Yes     | 67  | 10-Sep-2019 | 17:50         | :18                  | 176          | 176          | Active               |
| SVT-Wavelet |         |        |         | 66  | 10-Sep-2019 | 17:50         | :10                  | 176          | 176          | Active               |
| VT          | 1       |        | Yes     | 65  | 14-Jul-2019 | 12:03         | :11                  | 176          | ---          | Active               |
| VT-NS       |         |        |         | 64  | 14-Jul-2019 | 12:02         | <:01                 | 171          |              | Active               |
| SVT-Wavelet |         |        |         | 63  | 01-Jul-2019 | 12:25         | :10                  | 171          | 171          | Active               |
| VT-NS       |         |        |         | 62  | 07-May-2019 | 09:08         | :03                  | 171          |              | Active               |
| VT          | 1       |        | Yes     | 61  | 07-May-2019 | 09:08         | :10                  | 176          | ---          | Active               |
| VT-NS       |         |        |         | 60  | 30-Apr-2019 | 21:02         | :01                  | 171          |              | Active               |
| VT          | 1       |        | Yes     | 59  | 30-Apr-2019 | 21:00         | :12                  | 176          | 176          | Active               |
| VT          | 2       |        | Yes     | 58  | 30-Apr-2019 | 20:59         | :16                  | 176          | 176          | Active               |
| VT          | 2       |        | Yes     | 57  | 30-Apr-2019 | 20:49         | :17                  | 171          | 171          | Active               |
| VT-NS       |         |        |         | 56  | 30-Apr-2019 | 20:48         | :02                  | 171          |              | Active               |
| VT          | 3       |        | Yes     | 55  | 30-Apr-2019 | 20:47         | :22                  | 171          | 176          | Active               |
| VT-NS       |         |        |         | 54  | 30-Apr-2019 | 20:47         | :03                  | 171          |              | Active               |
| VT          | 2       |        | Yes     | 53  | 30-Apr-2019 | 20:46         | :15                  | 176          | 176          | Active               |
| VT          | 1       |        | Yes     | 52  | 30-Apr-2019 | 20:46         | :13                  | 171          | 171          | Active               |
| VT-NS       |         |        |         | 51  | 30-Apr-2019 | 20:45         | :04                  | 171          |              | Active               |
| VT          | 2       |        | Yes     | 50  | 30-Apr-2019 | 20:40         | :16                  | 176          | ---          | Active               |
| VT          | 1       |        | Yes     | 49  | 30-Apr-2019 | 20:39         | :10                  | 171          | 171          | Active               |
| VT          | 1       |        | Yes     | 48  | 30-Apr-2019 | 20:39         | :11                  | 171          | 171          | Active               |
| VT          | 2       |        | Yes     | 47  | 30-Apr-2019 | 20:24         | :16                  | 171          | 171          | Active               |
| VT          | 2       |        | Yes     | 46  | 30-Apr-2019 | 20:23         | :16                  | 171          | 171          | Active               |
| VT          | 1       |        | Yes     | 45  | 30-Apr-2019 | 20:22         | :12                  | 176          | ---          | Active               |
| VT          | 1       |        | Yes     | 43  | 30-Apr-2019 | 20:21         | :08                  | 171          | 171          | Active               |
| VT          | 3       |        | Yes     | 39  | 03-Dec-2018 | 10:25         | :27                  | 176          | 182          | Active               |
| VT          | 1       |        | Yes     | 37  | 03-Dec-2018 | 10:23         | :13                  | 176          | 176          | Active               |
| VT          | 1       |        | Yes     | 33  | 03-Dec-2018 | 10:20         | :13                  | 176          | ---          | Active               |
| SVT-Wavelet |         |        |         | 32  | 12-Oct-2018 | 10:45         | :12                  | 176          | ---          | Active               |
| SVT-Wavelet |         |        |         | 31  | 12-Oct-2018 | 10:45         | :10                  | 176          | 176          | Active               |
| VF          | 0       | 35J    | Yes     | 30  | 12-Oct-2018 | 08:05         | :14                  | 333          | ---          | Rest                 |
| VF          | 0       | 35J    | Yes     | 29  | 12-Oct-2018 | 05:29         | :13                  | 316          | ---          | Rest                 |
| VF          | 0       | 35J    | Yes     | 28  | 02-Sep-2018 | 07:20         | :13                  | 353          | 353          | Rest                 |
| VF          | 0       | 35J    | Yes     | 27  | 02-Sep-2018 | 06:04         | :13                  | 375          | ---          | Rest                 |
| VF          | 0       | 35J    | Yes     | 26  | 02-Sep-2018 | 05:41         | :13                  | 353          | ---          | Rest                 |
| VF          | 0       | 35J    | Yes     | 25  | 02-Sep-2018 | 04:56         | :13                  | 333          | 375          | Rest                 |
| VF          | 0       | 35J    | Yes     | 24  | 31-Aug-2018 | 05:08         | :13                  | 316          | 316          | Rest                 |
| VF          | 0       | 35J    | Yes     | 23  | 25-Jun-2018 | 03:04         | :12                  | 400          | ---          | Rest                 |
| SVT-Wavelet |         |        |         | 22  | 17-Dec-2017 | 11:32         | :31                  | 171          | 171          | Active               |
| SVT-Wavelet |         |        |         | 20  | 17-Sep-2017 | 03:31         | :25                  | 171          | 171          | Active               |
| SVT-Wavelet |         |        |         | 19  | 17-Sep-2017 | 03:29         | :54                  | 176          | 176          | Active               |
| VF          | 0       | 35J    | Yes     | 17  | 02-Sep-2017 | 06:03         | :12                  | 333          | 333          | Rest                 |
| VF          | 0       | 35J    | Yes     | 16  | 28-Aug-2017 | 07:06         | :12                  | 429          | ---          | Rest                 |
| VF          | 0       | 35J    | Yes     | 15  | 05-Jul-2017 | 07:48         | :13                  | 316          | 316          | Rest                 |
| VF          | 0       | 35J    | Yes     | 14  | 27-Jun-2017 | 10:28         | :13                  | 333          | 333          | Active               |
| VF          | 0       | 35J    | Yes     | 11  | 27-May-2017 | 21:18         | :13                  | 429          | ---          | Rest                 |
| VF          | 0       | 35J    | Yes     | 10  | 17-May-2017 | 06:01         | :14                  | 400          | ---          | Rest                 |
| SVT-Wavelet |         |        |         | 7   | 31-Jan-2017 | 22:32         | :49                  | 176          | 176          | Active               |
| SVT-Wavelet |         |        |         | 6   | 31-Jan-2017 | 16:20         | :21                  | 176          | 176          | Active               |

# Treated VT/VF Episode #209

Device: **Evera S VR DVBC3D1**

Serial Number:

Date of Visit: **23-Nov-2020 21:14:00**

Patient:

ID:

Physician:

| Type | ATP Seq | Shocks | Success | ID# | Date        | Time<br>hh:mm | Duration<br>hh:mm:ss | Avg bpm<br>V | Max bpm<br>V | Activity at<br>Onset |
|------|---------|--------|---------|-----|-------------|---------------|----------------------|--------------|--------------|----------------------|
| VF   | 0       | 35J    | Yes     | 209 | 21-Nov-2020 | 05:47         | :14                  | 353          | ---          | Rest                 |

• V-V      VF = 320 ms      VT = 390 ms

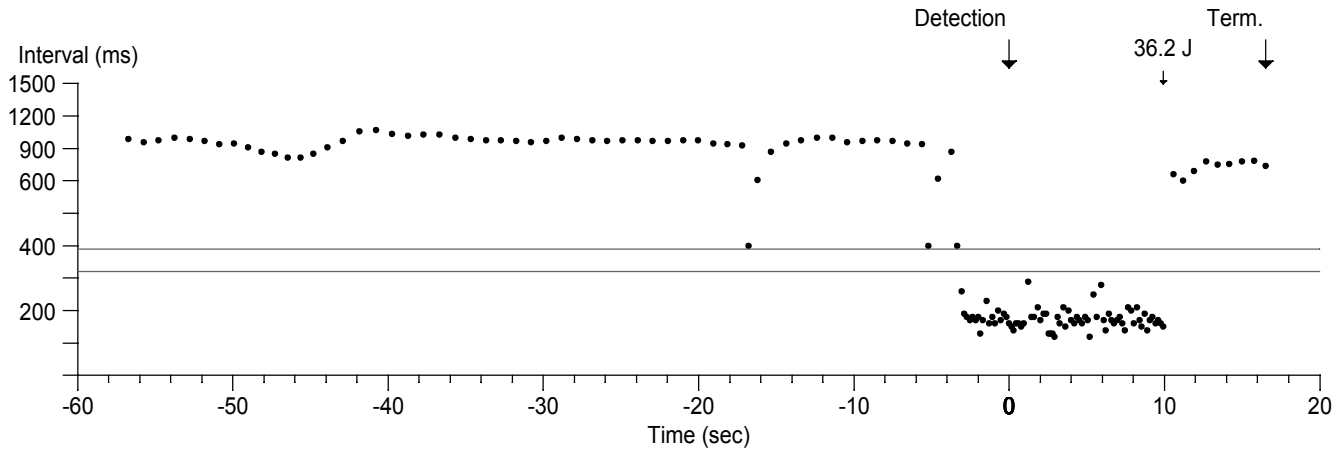

# Treated VT/VF Episode #209

Device: **Evera S VR DVBC3D1**

Serial Number:

Date of Visit: **23-Nov-2020 21:14:00**

Patient:

ID:

**Episode #209 - VF** Chart speed: 25.0 mm/sec

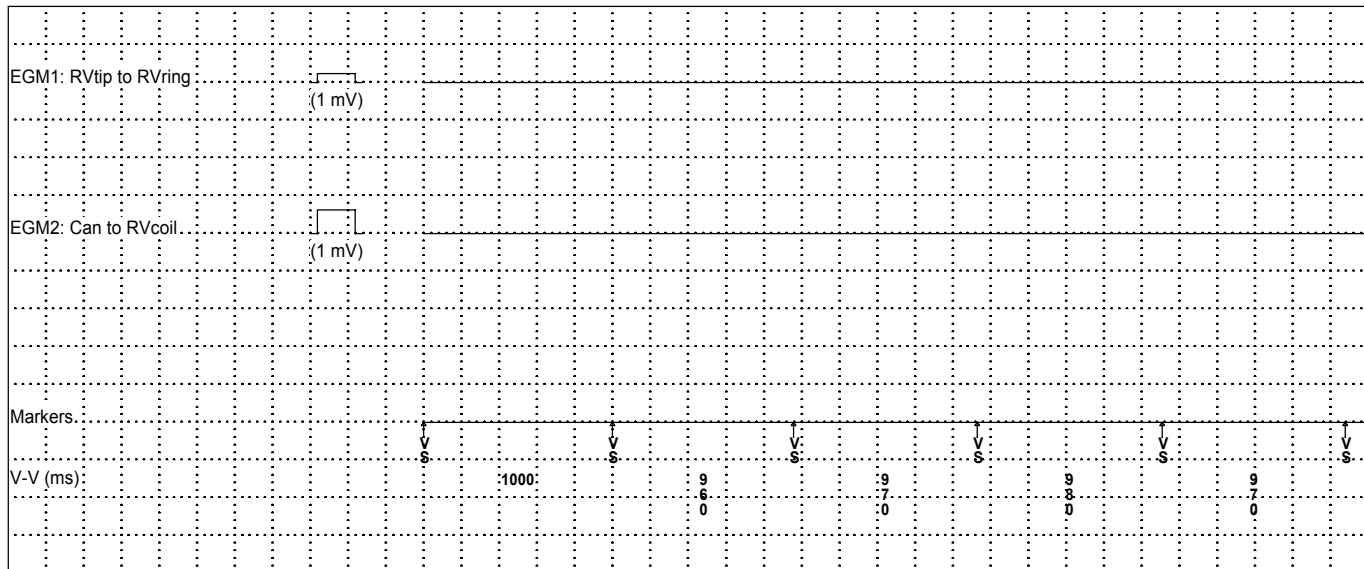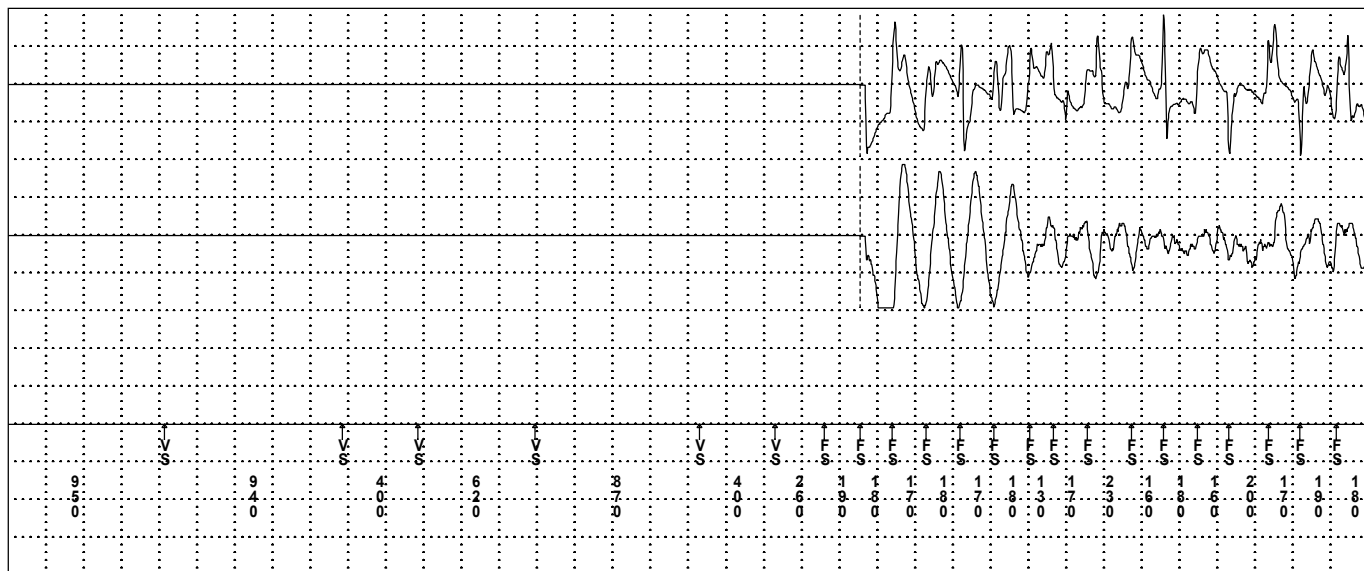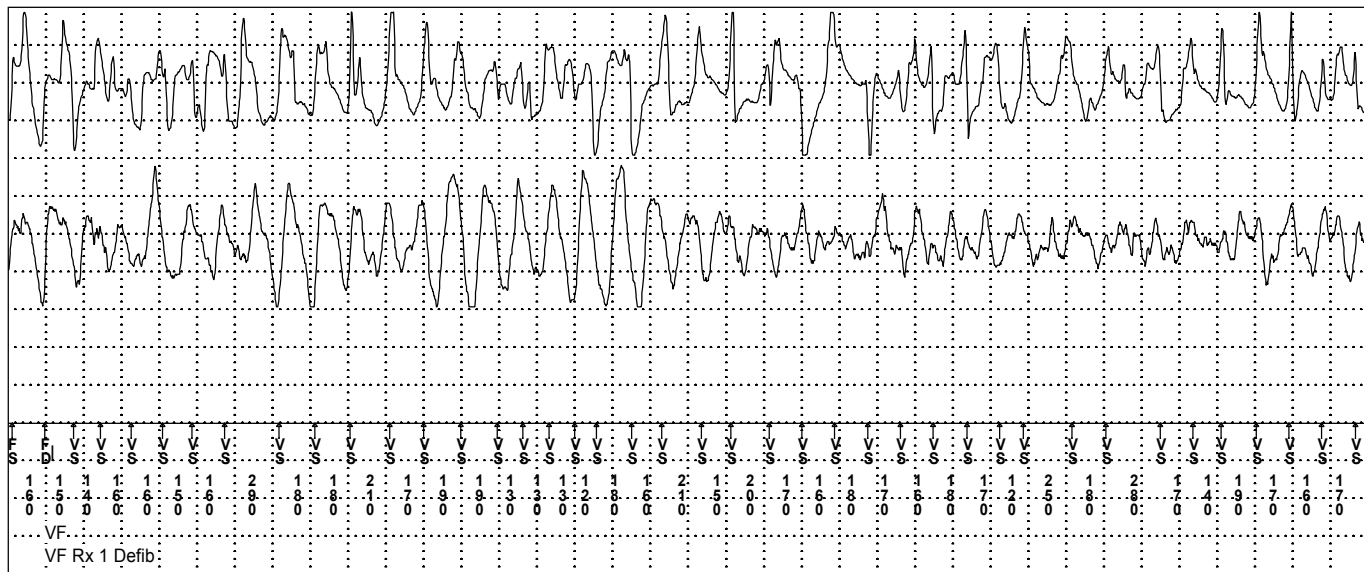



# Treated VT/VF Episode #209

 Device: **Evera S VR DVBC3D1**

Serial Number:

 Date of Visit: **23-Nov-2020 21:14:00**

Patient:

ID:

Physician:

## Episode #209: 21-Nov-2020 05:47:25

### Episode Summary

Initial Type VF (spontaneous)  
 Duration 14 sec  
 V. Max Rate ---  
 V. Median 333 bpm (180 ms)  
 Activity at onset Rest, Sensor = 43 bpm  
 Last Therapy VF Rx1: Defib, Successful

### Initial VT/VF Detection Withheld By

None

| Therapies     | Delivered | Charge   | Ohms    | Energy     |
|---------------|-----------|----------|---------|------------|
| VF Rx 1 Defib | 36.2 J    | 9.68 sec | 48 ohms | 0.0 - 35 J |

Termination

### Wavelet Measurements Prior to Initial VT/VF Detection

Wavelet Result: Wavelet not applied; interval too fast or too slow  
 Template Status: OK

- 8. No Match --- Interval too fast
- 7. No Match --- Interval too fast
- 6. No Match --- Interval too fast
- 5. No Match --- Interval too fast
- 4. No Match --- Interval too fast
- 3. No Match --- Interval too fast
- 2. No Match --- Interval too fast
- 1. No Match --- Interval too fast
- 0. Detection

| Parameter Settings | Initial | Redetect | V. Interval (Rate) |
|--------------------|---------|----------|--------------------|
| VF On              | 18/24   | 9/12     | 320 ms (188 bpm)   |
| FVT Off            |         |          |                    |
| VT On              | 16      | 12       | 390 ms (154 bpm)   |
| Monitor Monitor    | 32      |          | 450 ms (133 bpm)   |

### Wavelet

Wavelet On, Match = 70 %  
 Template 20-Nov-2020, Auto = On  
 SVT V. Limit 260 ms

### Other Enhancements

Stability Off  
 Onset Off  
 High Rate Timeout  
     VF Zone Only 0.75 min  
     All Zones Off  
 TWave On  
 RV Lead Noise On+Timeout  
 Timeout 0.75 min

### Polarity

### RV

Pace Polarity Bipolar  
 Sense Polarity Bipolar

| EGM            | Source          | Range     | Sensitivity |
|----------------|-----------------|-----------|-------------|
| EGM1           | RVtip to RVring | +/- 8 mV  | RV 0.3 mV   |
| EGM2 (Wavelet) | Can to RVcoil   | +/- 12 mV |             |



# Treated VT/VF Episode #209

Device: **Evera S VR DVBC3D1**

Serial Number:

Date of Visit: **23-Nov-2020 21:14:00**

Patient:

ID:

Physician:

| Type | ATP Seq | Shocks | Success | ID# | Date        | Time<br>hh:mm | Duration<br>hh:mm:ss | Avg bpm<br>V | Max bpm<br>V | Activity at<br>Onset |
|------|---------|--------|---------|-----|-------------|---------------|----------------------|--------------|--------------|----------------------|
| VF   | 0       | 35J    | Yes     | 209 | 21-Nov-2020 | 05:47         | :14                  | 353          | ---          | Rest                 |

No Match ---                      No Match ---                      No Match ---                      No Match ---



6 mV  
 20 ms  
 ——— QRS  
 - - - - Template

No Match ---                      No Match ---                      No Match ---                      No Match ---



# Lead Trends - RV

Device: **Evera S VR DVBC3D1**

Serial Number:

Date of Visit: **23-Nov-2020 21:14:00**

Patient:

ID:

Physician:

RV Pace Polarity        **Bipolar**  
RV Sense Polarity      **Bipolar**

## RV Impedance (bipolar)

Last Measured 475 ohms



## RV Impedance (tip to coil)

Last Measured 399 ohms

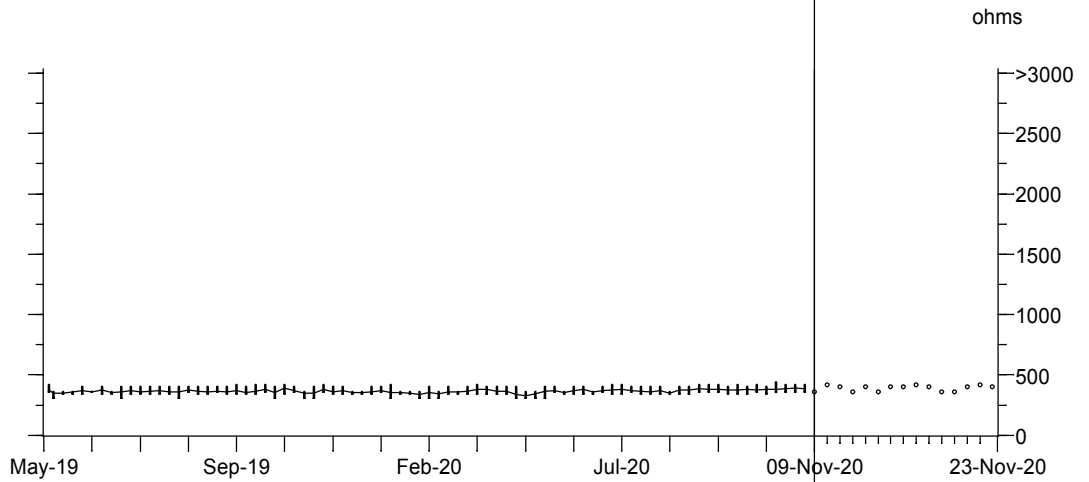

## RV Impedance

—— Bipolar  
- - - - Tip to Coil

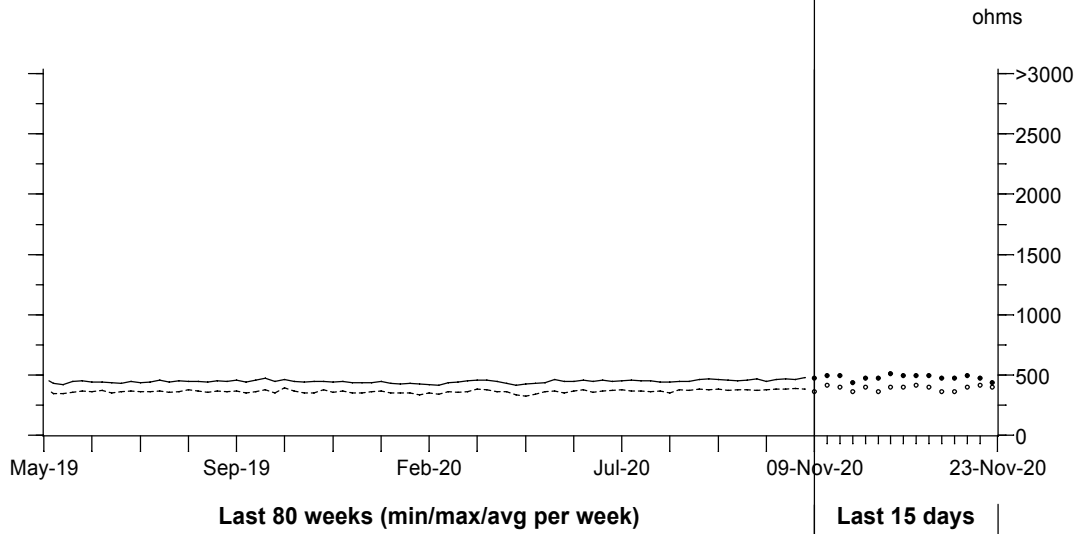

# Lead Trends - RV

Device: **Evera S VR DVBC3D1**

Serial Number:

Date of Visit: **23-Nov-2020 21:14:00**

Patient:

ID:

Physician:

## RV Threshold

Capture Adaptive  
Amplitude 2.00 V  
Pulse Width 0.40 ms  
Last Measured 0.875 V @ 0.40 ms  
Measured On 22-Nov-2020

V @ 0.40 ms



## R-Wave Amplitude

Sensitivity 0.30 mV  
Last Measured 15.1 mV

mV



# Lead Trends - RV

Device: **Evera S VR DVBC3D1**

Serial Number:

Date of Visit: **23-Nov-2020 21:14:00**

Patient:

ID:

Physician:

## RV Defib Impedance

Last Measured 48 ohms

ohms

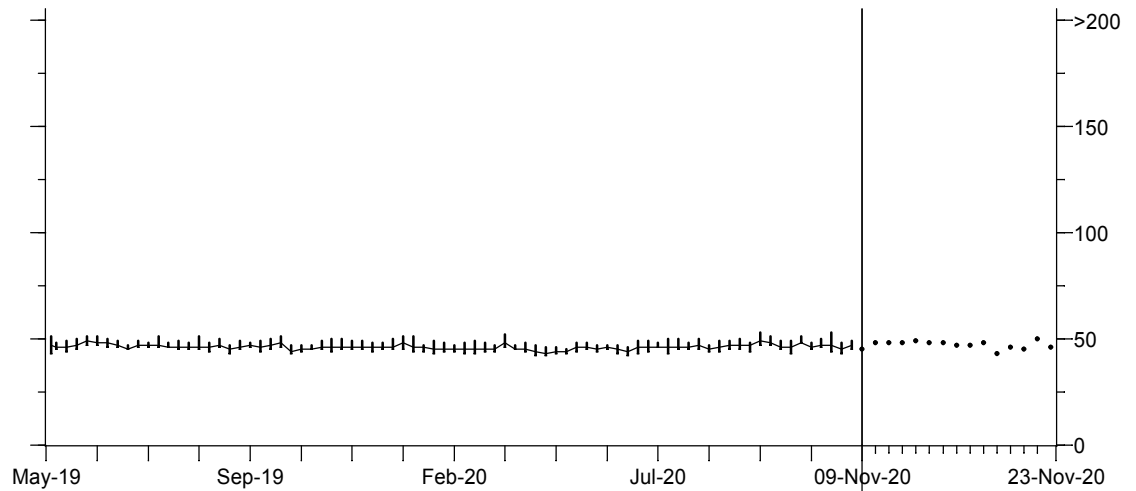

## SVC Defib Impedance

Last Measured 68 ohms

ohms

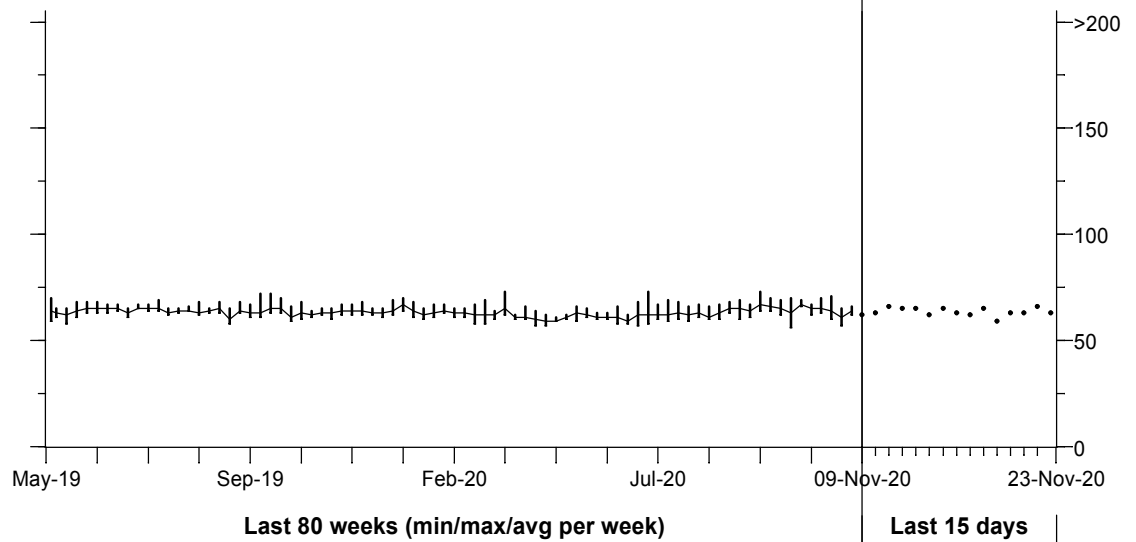

# Battery and Lead Measurements Report

Device: **Evera S VR DVBC3D1**

Serial Number:

Date of Visit: **23-Nov-2020 21:14:00**

Patient:

ID:

Physician:

Last Interrogation: 23-Nov-2020 21:14:00

## **Remaining Longevity** **23-Nov-2020**

Estimated at: Replace Device RRT  
Minimum: Replace Device  
Maximum: Replace Device  
(RRT on 22-Nov-2020)  
(based on initial interrogation)

## **Battery Voltage** **23-Nov-2020**

Voltage 2.71 V  
(RRT=2.73V on 22-Nov-2020)

## **Last Charge** **21-Nov-2020**

Charge Time 9.7 sec  
Energy 0.0 - 35 J

## **Sensing Integrity Counter** **Since 23-Nov-2020**

Short V-V Intervals 0

## **Lead Impedance**

RV Pacing (Bipolar) 475 ohms 23-Nov-2020  
RV Defib 48 ohms 23-Nov-2020  
SVC Defib 68 ohms 23-Nov-2020

## **Sensing**

R-Wave Amplitude 15.1 mV 23-Nov-2020

## **Last High Voltage Therapy** **21-Nov-2020**

Measured Impedance 48 ohms  
Delivered Energy 36 J  
Waveform Biphasic  
Pathway B>AX

# Parameters

Device: **Evera S VR DVBC3D1**

Serial Number:

Date of Visit: **23-Nov-2020 21:14:00**

Patient:

ID:

Physician:

## Pacing Summary

| Mode |     | Rates |        |
|------|-----|-------|--------|
| Mode | VVI | Lower | 40 bpm |

## Pacing Details

|                        | RV          |
|------------------------|-------------|
| Amplitude              | 2.00 V      |
| Pulse Width            | 0.40 ms     |
| Capture Management     | Adaptive    |
| Amplitude Margin       | 2.0 X       |
| Min. Adapted Amplitude | 2.00 V      |
| Acute Phase Remaining  | Off         |
| Acute Phase Completed  | 23-Aug-2016 |
| Sensitivity            | 0.30 mV     |
| Pace Polarity          | Bipolar     |
| Sense Polarity         | Bipolar     |

## Refractory/Blanking

|                  |        |
|------------------|--------|
| V. Blank Post VP | 200 ms |
| V. Blank Post VS | 120 ms |

## Arrhythmia Interventions

|                       |     |
|-----------------------|-----|
| V. Rate Stabilization | Off |
|-----------------------|-----|

## Post Shock Pacing

|                                          |         |
|------------------------------------------|---------|
| Post Shock Pacing*                       |         |
| V. Amplitude                             | 6 V     |
| V. Pulse Width                           | 1.50 ms |
| * Settings for first 25 beats post shock |         |
| Post VT/VF Shock Pacing                  | Off     |

## Additional Features

|                 |     |
|-----------------|-----|
| Rate Hysteresis | Off |
| Sleep           | Off |

## Device Information

|        |           |                    |                        |
|--------|-----------|--------------------|------------------------|
| Device | Medtronic | Evera S VR DVBC3D1 | Implanted: 25-Apr-2016 |
|--------|-----------|--------------------|------------------------|

# Parameters

 Device: **Evera S VR DVBC3D1**

Serial Number:

 Date of Visit: **23-Nov-2020 21:14:00**

Patient:

ID:

Physician:

## VT/VF Detection

|         |         | V. Interval (Rate) | Initial | Redetect |                                                                                                 |
|---------|---------|--------------------|---------|----------|-------------------------------------------------------------------------------------------------|
| VF      | On      | 320 ms (188 bpm)   | 18/24   | 9/12     |  320 ms        |
| FVT     | OFF     |                    |         |          |                                                                                                 |
| VT      | On      | 390 ms (154 bpm)   | 16      | 12       |  390 ms        |
| Monitor | Monitor | 450 ms (133 bpm)   | 32      |          | No Rx  450 ms |

| Wavelet         |             | Other Enhancements | Sensitivity |
|-----------------|-------------|--------------------|-------------|
| Wavelet         | On          | Stability          | Off         |
| Template        | 22-Nov-2020 | Onset              | Off         |
| Match Threshold | 70 %        | High Rate Timeout  |             |
| Auto Collection | On          | VF Zone Only       | 0.75 min    |
| SVT V. Limit    | 260 ms      | All Zones          | Off         |
|                 |             | TWave              | On          |
|                 |             | RV Lead Noise      | On+Timeout  |
|                 |             | Timeout            | 0.75 min    |

| VF Therapies      | Rx1  | Rx2  | Rx3  | Rx4  | Rx5  | Rx6  |
|-------------------|------|------|------|------|------|------|
| VF Therapy Status | On   | On   | On   | On   | On   | On   |
| Energy            | 35 J |
| Pathway           | B>AX | AX>B | B>AX | AX>B | B>AX | AX>B |

ATP During Charging

Deliver ATP if last 8 R-R &gt;= 240 ms, Burst, Pulses = 8, R-S1 = 88 %, Decrement = 10 ms

ChargeSaver = On(1 episodes), SmartMode = On

| FVT Therapies      | Rx1 | Rx2 | Rx3 | Rx4 | Rx5 | Rx6 |
|--------------------|-----|-----|-----|-----|-----|-----|
| FVT Therapy Status | Off | Off | Off | Off | Off | Off |

| VT Therapies        | Rx1   | Rx2   | Rx3   | Rx4  | Rx5  | Rx6  |
|---------------------|-------|-------|-------|------|------|------|
| VT Therapy Status   | On    | On    | On    | On   | On   | On   |
| Therapy Type        | Burst | Ramp  | Ramp+ | CV   | CV   | CV   |
| Energy              |       |       |       | 35 J | 35 J | 35 J |
| Pathway             |       |       |       | B>AX | AX>B | AX>B |
| Initial # Pulses    | 8     | 8     | 3     |      |      |      |
| R-S1 Interval=(%RR) | 88 %  | 91 %  | 75 %  |      |      |      |
| S1S2(Ramp+)=(%RR)   |       |       | 69 %  |      |      |      |
| S2SN(Ramp+)=(%RR)   |       |       | 66 %  |      |      |      |
| Interval Dec        | 10 ms | 10 ms |       |      |      |      |
| # Sequences         | 3     | 3     | 3     |      |      |      |
| Smart Mode          | Off   | Off   | Off   |      |      |      |

### Shared V. ATP

|                          |        |
|--------------------------|--------|
| V-V Minimum ATP Interval | 200 ms |
| V. Amplitude             | 8 V    |
| V. Pulse Width           | 1.5 ms |
| V. Pace Blanking         | 240 ms |

### Shared V. Therapies

|                               |            |
|-------------------------------|------------|
| Active Can/SVC Coil           | Can+SVC On |
| Progressive Episode Therapies | Off        |
| Confirmation+                 | On         |

# Parameters

Device: **Evera S VR DVBC3D1**

Serial Number:

Date of Visit: **23-Nov-2020 21:14:00**

Patient:

ID:

Physician:

## Data Collection Setup

|                    | Source            | Range     |
|--------------------|-------------------|-----------|
| LECG               | Can to SVC        | +/- 2 mV  |
| EGM 1              | RVtip to RVring   | +/- 8 mV  |
| EGM 2 (Wavelet)    | Can to RVcoil     | +/- 12 mV |
| EGM 3              | RVtip to RVcoil   | +/- 8 mV  |
| Monitored          | EGM1 and EGM2     |           |
| Pre-arrhythmia EGM | Off               |           |
| Device Date/Time   | 23-Nov-2020 21:15 |           |
| Holter Telemetry   | Off               |           |

## Medtronic CareAlert Setup

Patient Home Monitor No  
Alert Time 08:00

| Alert Conditions                              | Enable-Urgency<br>Tone | Threshold          |
|-----------------------------------------------|------------------------|--------------------|
| Number of Shocks Delivered in an Episode      | Off                    |                    |
| All Therapies in a Zone Exhausted             | Off                    |                    |
| RV Lead Integrity                             | On-High                |                    |
| RV Lead Noise                                 | On-High                |                    |
| RV Pacing Lead Impedance Out of Range         | On-High                | <200 or >3000 ohms |
| RV Defibrillation Lead Impedance Out of Range | On-High                | <20 or >200 ohms   |
| SVC Defib Lead Impedance Out of Range         | On-High                | <20 or >200 ohms   |
| Low Battery Voltage RRT                       | On-High                | 2.73 V(RRT)        |
| Excessive Charge Time EOS                     | On-High                |                    |
| VF Detection OFF, 3+ VF or 3+ FVT Rx Off.     | On-High                |                    |



## Changes This Session

Device: **Evera S VR DVBC3D1**

Serial Number:

Date of Visit: **23-Nov-2020 21:14:00**

Patient:

ID:

Physician:

---

| <b>Parameter</b> | <b>Session Start</b> | <b>Current Value</b> |
|------------------|----------------------|----------------------|
|------------------|----------------------|----------------------|

---

No parameters have been changed during the current session.

# Patient Information Report

Device: **Evera S VR DVBC3D1**

Serial Number:

Date of Visit: **23-Nov-2020 21:14:00**

Patient:

ID:

Physician:

## Patient Identification

Patient

ID

Date of Birth

## History

VT/VF

Slowest VT

Atrial Status

AV Conduction

Heart Failure

Activity Level

EF, on

---

## Physician Information

Physician

Phone

Hospital

Last Update 03-Sep-2020

## Leads

Lead 1

Lead Model

Lead Position

Manufacturer

Serial Number

Implant Date

Lead 2

Lead Model

Lead Position

Manufacturer

Serial Number

Implant Date

Lead 3

Lead Model

Lead Position

Manufacturer

Serial Number

Implant Date

## Implant

Implant Date 25-Apr-2016

Defibrillation Energy ---

HV Impedance (ohms)

**RV**

R Wave Amplitude (mV)

Slew Rate ---

Pacing Threshold Amp. ---

Pulse Width Setting ---

Pacing Impedance (ohms)

Threshold Current (mA)

Notes:

# Monitored VT Episode #210

Device: **Evera S VR DVBC3D1**

Serial Number:

Date of Visit: **23-Nov-2020 21:14:00**

Patient:

ID:

Physician:

| Type   | ATP Seq | Shocks | Success ID# | Date        | Time hh:mm | Duration hh:mm:ss | Avg bpm V | Max bpm V | Activity at Onset |
|--------|---------|--------|-------------|-------------|------------|-------------------|-----------|-----------|-------------------|
| VT-Mon |         |        | 210         | 22-Nov-2020 | 22:11      | :17               | 137       | 140       | Active            |

• V-V VTM = 450 ms

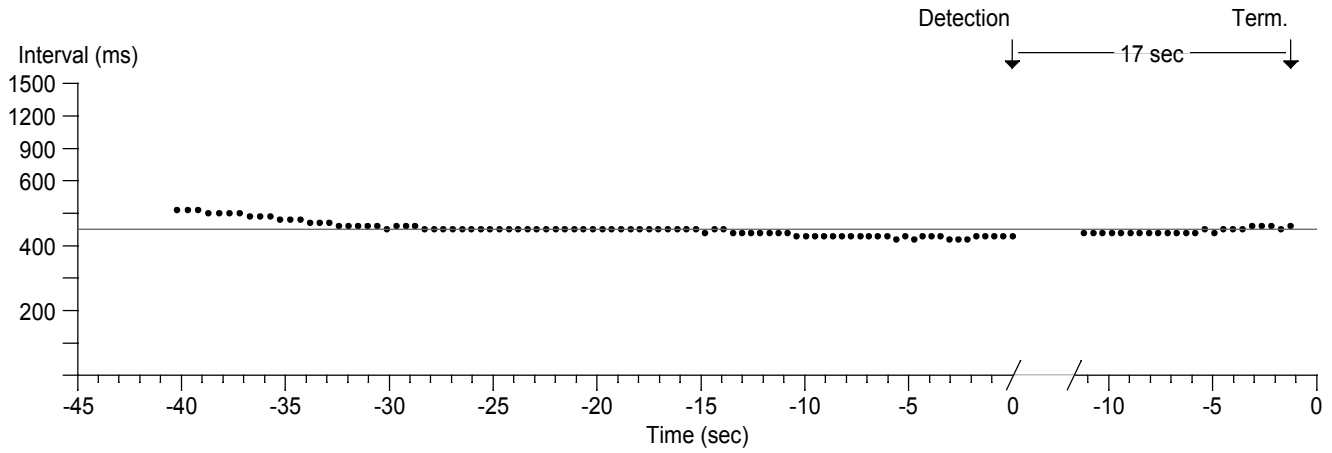



# Monitored VT Episode #210

Device: **Evera S VR DVBC3D1**

Serial Number:

Date of Visit: **23-Nov-2020 21:14:00**

Patient:

ID:

**Episode #210 Chart speed: 25.0 mm/sec**

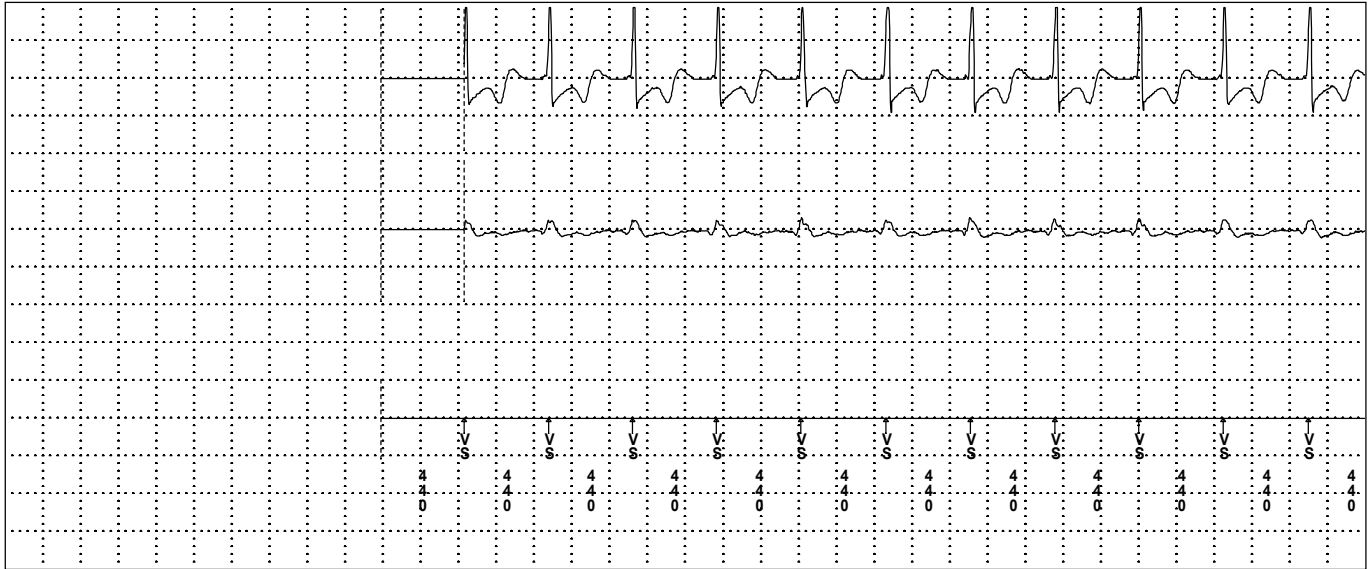

# Monitored VT Episode #210

Device: **Evera S VR DVBC3D1**

Serial Number:

Date of Visit: **23-Nov-2020 21:14:00**

Patient:

ID:

Physician:

## Episode #210: 22-Nov-2020 22:11:46

### Episode Summary

Initial Type VT Monitor (spontaneous)  
Duration 17 sec (31 beats)  
V. Max Rate 140 bpm  
V. Median 140 bpm (430 ms)  
Activity at onset Active, Sensor = 91 bpm

### Wavelet Measurements Prior to Initial VT Detection

Wavelet Result: VT/VF  
Template Status: OK

-8. No Match 40 %  
-7. No Match 1 %  
-6. No Match 7 %  
-5. No Match 4 %  
-4. No Match 0 %  
-3. No Match 55 %  
-2. No Match 0 %  
-1. No Match 0 %  
0. Detection

| Parameter | Settings | Initial | Redetect | V. Interval (Rate) |
|-----------|----------|---------|----------|--------------------|
| VF        | On       | 18/24   | 9/12     | 320 ms (188 bpm)   |
| FVT       | Off      |         |          |                    |
| VT        | On       | 16      | 12       | 390 ms (154 bpm)   |
| Monitor   | Monitor  | 32      |          | 450 ms (133 bpm)   |

### Wavelet

Wavelet On, Match = 70 %  
Template 22-Nov-2020, Auto = On  
SVT V. Limit 260 ms

### Other Enhancements

Stability Off  
Onset Off  
High Rate Timeout  
VF Zone Only 0.75 min  
All Zones Off  
TWave On  
RV Lead Noise On+Timeout  
Timeout 0.75 min

### Polarity

#### RV

Pace Polarity Bipolar  
Sense Polarity Bipolar

| EGM            | Source          | Range     | Sensitivity |
|----------------|-----------------|-----------|-------------|
| EGM1           | RVtip to RVring | +/- 8 mV  | RV 0.3 mV   |
| EGM2 (Wavelet) | Can to RVcoil   | +/- 12 mV |             |

# Monitored VT Episode #210

Device: **Evera S VR DVBC3D1**

Serial Number:

Date of Visit: **23-Nov-2020 21:14:00**

Patient:

ID:

Physician:

| Type   | ATP Seq | Shocks | Success | ID# | Date        | Time<br>hh:mm | Duration<br>hh:mm:ss | Avg bpm<br>V | Max bpm<br>V | Activity at<br>Onset |
|--------|---------|--------|---------|-----|-------------|---------------|----------------------|--------------|--------------|----------------------|
| VT-Mon |         |        |         | 210 | 22-Nov-2020 | 22:11         | :17                  | 137          | 140          | Active               |

No Match 40 %      No Match 1 %      No Match 7 %      No Match 4 %

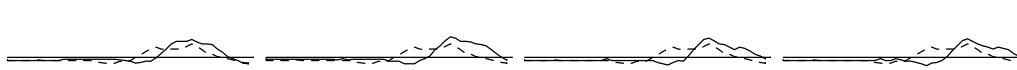

6 mV  
20 ms  
— QRS  
- - - Template

No Match 0 %      No Match 55 %      No Match 0 %      No Match 0 %

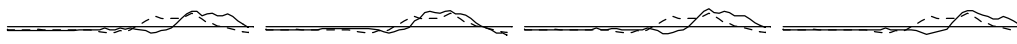

# Treated VT/VF Episode #209

Device: **Evera S VR DVBC3D1**

Serial Number:

Date of Visit: **23-Nov-2020 21:14:00**

Patient:

ID:

Physician:

| Type | ATP Seq | Shocks | Success | ID# | Date        | Time<br>hh:mm | Duration<br>hh:mm:ss | Avg bpm<br>V | Max bpm<br>V | Activity at<br>Onset |
|------|---------|--------|---------|-----|-------------|---------------|----------------------|--------------|--------------|----------------------|
| VF   | 0       | 35J    | Yes     | 209 | 21-Nov-2020 | 05:47         | :14                  | 353          | ---          | Rest                 |

• V-V      VF = 320 ms      VT = 390 ms





# Treated VT/VF Episode #209

Device: **Evera S VR DVBC3D1**

Serial Number:

Date of Visit: **23-Nov-2020 21:14:00**

Patient:

ID:

**Episode #209 - VF Chart speed: 25.0 mm/sec**



# Treated VT/VF Episode #209

Device: **Evera S VR DVBC3D1**

Serial Number:

Date of Visit: **23-Nov-2020 21:14:00**

Patient:

ID:

**Episode #209 - VF Chart speed: 25.0 mm/sec**



# Treated VT/VF Episode #209

Device: **Evera S VR DVBC3D1**

Serial Number:

Date of Visit: **23-Nov-2020 21:14:00**

Patient:

ID:

Physician:

## Episode #209: 21-Nov-2020 05:47:25

### Episode Summary

Initial Type VF (spontaneous)  
 Duration 14 sec  
 V. Max Rate ---  
 V. Median 333 bpm (180 ms)  
 Activity at onset Rest, Sensor = 43 bpm  
 Last Therapy VF Rx1: Defib, Successful

### Initial VT/VF Detection Withheld By

None

### Therapies Delivered Charge Ohms Energy

VF Rx 1 Defib 36.2 J 9.68 sec 48 ohms 0.0 - 35 J

Termination

### Wavelet Measurements Prior to Initial VT/VF Detection

Wavelet Result: Wavelet not applied; interval too fast or too slow  
 Template Status: OK

- 8. No Match --- Interval too fast
- 7. No Match --- Interval too fast
- 6. No Match --- Interval too fast
- 5. No Match --- Interval too fast
- 4. No Match --- Interval too fast
- 3. No Match --- Interval too fast
- 2. No Match --- Interval too fast
- 1. No Match --- Interval too fast
- 0. Detection

### Parameter Settings Initial Redetect V. Interval (Rate)

|         |         |       |      |                  |
|---------|---------|-------|------|------------------|
| VF      | On      | 18/24 | 9/12 | 320 ms (188 bpm) |
| FVT     | Off     |       |      |                  |
| VT      | On      | 16    | 12   | 390 ms (154 bpm) |
| Monitor | Monitor | 32    |      | 450 ms (133 bpm) |

### Wavelet

Wavelet On, Match = 70 %  
 Template 20-Nov-2020, Auto = On  
 SVT V. Limit 260 ms

### Other Enhancements

Stability Off  
 Onset Off  
 High Rate Timeout  
     VF Zone Only 0.75 min  
     All Zones Off  
 TWave On  
 RV Lead Noise On+Timeout  
 Timeout 0.75 min

### Polarity RV

Pace Polarity Bipolar  
 Sense Polarity Bipolar

| EGM            | Source          | Range     | Sensitivity |
|----------------|-----------------|-----------|-------------|
| EGM1           | RVtip to RVring | +/- 8 mV  | RV 0.3 mV   |
| EGM2 (Wavelet) | Can to RVcoil   | +/- 12 mV |             |

# Treated VT/VF Episode #209

Device: **Evera S VR DVBC3D1**

Serial Number:

Date of Visit: **23-Nov-2020 21:14:00**

Patient:

ID:

Physician:

| Type | ATP Seq | Shocks | Success | ID# | Date        | Time<br>hh:mm | Duration<br>hh:mm:ss | Avg bpm<br>V | Max bpm<br>V | Activity at<br>Onset |
|------|---------|--------|---------|-----|-------------|---------------|----------------------|--------------|--------------|----------------------|
| VF   | 0       | 35J    | Yes     | 209 | 21-Nov-2020 | 05:47         | :14                  | 353          | ---          | Rest                 |

No Match ---                      No Match ---                      No Match ---                      No Match ---



6 mV  
 20 ms  
 — QRS  
 - - - - Template

No Match ---                      No Match ---                      No Match ---                      No Match ---



# Treated VT/VF Episode #208

Device: **Evera S VR DVBC3D1**

Serial Number:

Date of Visit: **23-Nov-2020 21:14:00**

Patient:

ID:

Physician:

| Type | ATP Seq | Shocks | Success | ID# | Date        | Time<br>hh:mm | Duration<br>hh:mm:ss | Avg bpm<br>V | Max bpm<br>V | Activity at<br>Onset |
|------|---------|--------|---------|-----|-------------|---------------|----------------------|--------------|--------------|----------------------|
| VF   | 0       | 35J    | Yes     | 208 | 19-Nov-2020 | 06:31         | :14                  | 353          | ---          | Rest                 |

• V-V      VF = 320 ms      VT = 390 ms

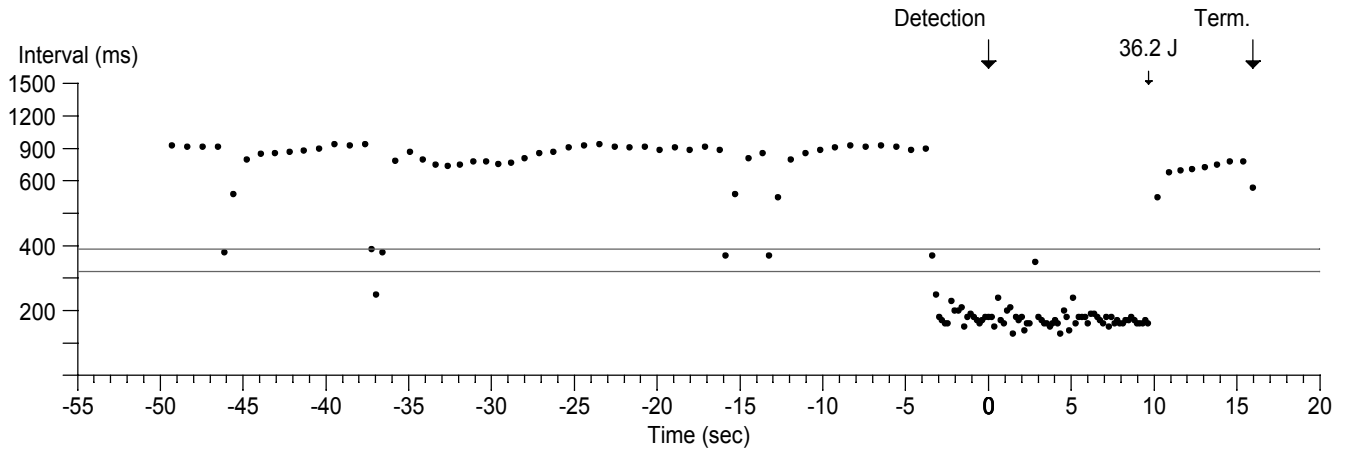



# Treated VT/VF Episode #208

Device: **Evera S VR DVBC3D1**

Serial Number:

Date of Visit: **23-Nov-2020 21:14:00**

Patient:

ID:

**Episode #208 - VF Chart speed: 25.0 mm/sec**

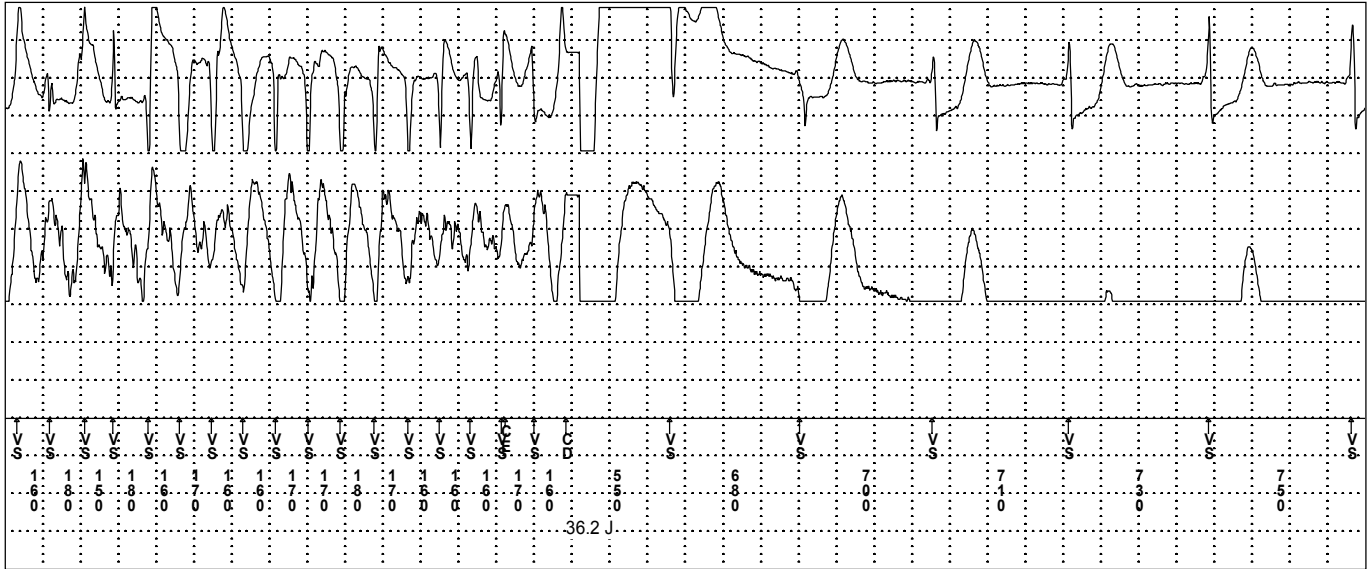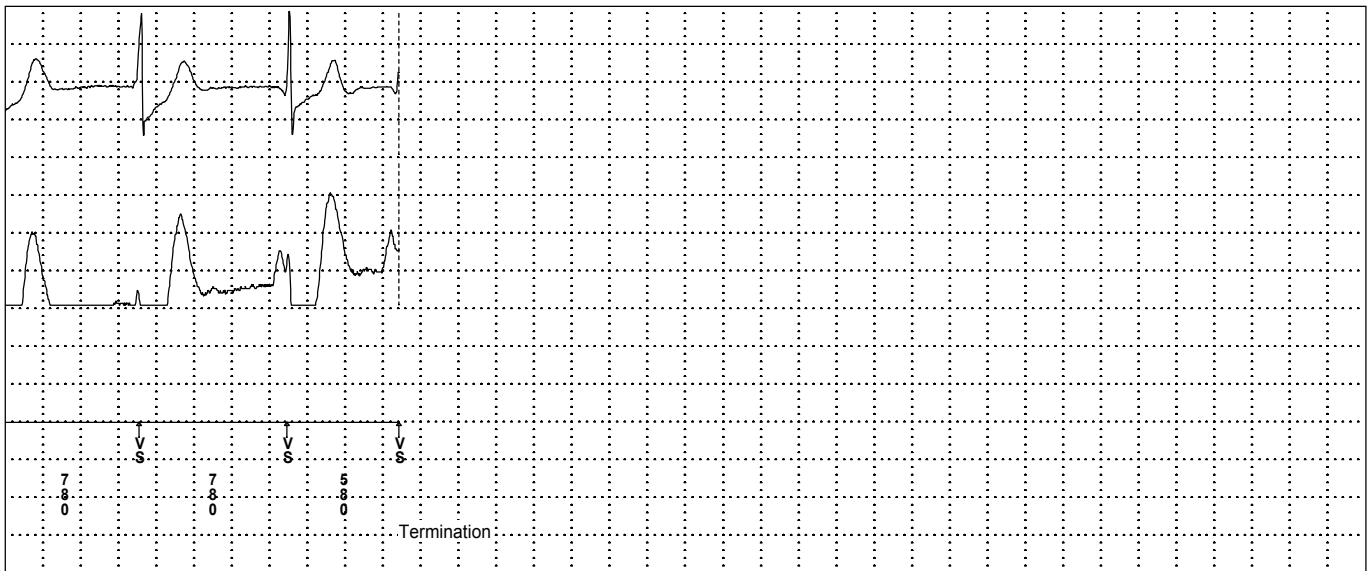

# Treated VT/VF Episode #208

Device: **Evera S VR DVBC3D1**

Serial Number:

Date of Visit: **23-Nov-2020 21:14:00**

Patient:

ID:

Physician:

## Episode #208: 19-Nov-2020 06:31:32

### Episode Summary

Initial Type VF (spontaneous)  
 Duration 14 sec  
 V. Max Rate ---  
 V. Median 333 bpm (180 ms)  
 Activity at onset Rest, Sensor = 48 bpm  
 Last Therapy VF Rx1: Defib, Successful

### Initial VT/VF Detection Withheld By

None

| Therapies     | Delivered | Charge   | Ohms    | Energy     |
|---------------|-----------|----------|---------|------------|
| VF Rx 1 Defib | 36.2 J    | 9.28 sec | 43 ohms | 0.0 - 35 J |

Termination

### Wavelet Measurements Prior to Initial VT/VF Detection

Wavelet Result: Wavelet not applied; interval too fast or too slow  
 Template Status: Inconsistent with intrinsic rhythm

- 8. No Match --- Interval too fast
- 7. No Match --- Interval too fast
- 6. No Match --- Interval too fast
- 5. No Match --- Interval too fast
- 4. No Match --- Interval too fast
- 3. No Match --- Interval too fast
- 2. No Match --- Interval too fast
- 1. No Match --- Interval too fast
- 0. Detection

| Parameter Settings | Initial | Redetect | V. Interval (Rate) |
|--------------------|---------|----------|--------------------|
| VF On              | 18/24   | 9/12     | 320 ms (188 bpm)   |
| FVT Off            |         |          |                    |
| VT On              | 16      | 12       | 390 ms (154 bpm)   |
| Monitor Monitor    | 32      |          | 450 ms (133 bpm)   |

### Wavelet

Wavelet On, Match = 70 %  
 Template 18-Nov-2020, Auto = On  
 SVT V. Limit 260 ms

### Other Enhancements

Stability Off  
 Onset Off  
 High Rate Timeout  
     VF Zone Only 0.75 min  
     All Zones Off  
 TWave On  
 RV Lead Noise On+Timeout  
 Timeout 0.75 min

### Polarity

### RV

Pace Polarity Bipolar  
 Sense Polarity Bipolar

| EGM            | Source          | Range     | Sensitivity |
|----------------|-----------------|-----------|-------------|
| EGM1           | RVtip to RVring | +/- 8 mV  | RV 0.3 mV   |
| EGM2 (Wavelet) | Can to RVcoil   | +/- 12 mV |             |



# Treated VT/VF Episode #208

Device: **Evera S VR DVBC3D1**

Serial Number:

Date of Visit: **23-Nov-2020 21:14:00**

Patient:

ID:

Physician:

| Type | ATP Seq | Shocks | Success | ID# | Date        | Time<br>hh:mm | Duration<br>hh:mm:ss | Avg bpm<br>V | Max bpm<br>V | Activity at<br>Onset |
|------|---------|--------|---------|-----|-------------|---------------|----------------------|--------------|--------------|----------------------|
| VF   | 0       | 35J    | Yes     | 208 | 19-Nov-2020 | 06:31         | :14                  | 353          | ---          | Rest                 |

No Match ---                      No Match ---                      No Match ---                      No Match ---



6 mV  
 20 ms  
 — QRS  
 - - - - Template

No Match ---                      No Match ---                      No Match ---                      No Match ---



# Treated VT/VF Episode #207

Device: **Evera S VR DVBC3D1**

Serial Number:

Date of Visit: **23-Nov-2020 21:14:00**

Patient:

ID:

Physician:

| Type | ATP Seq | Shocks | Success | ID# | Date        | Time<br>hh:mm | Duration<br>hh:mm:ss | Avg bpm<br>V | Max bpm<br>V | Activity at<br>Onset |
|------|---------|--------|---------|-----|-------------|---------------|----------------------|--------------|--------------|----------------------|
| VF   | 0       | 35J    | Yes     | 207 | 19-Nov-2020 | 05:00         | :14                  | 353          | ---          | Rest                 |

• V-V      VF = 320 ms      VT = 390 ms

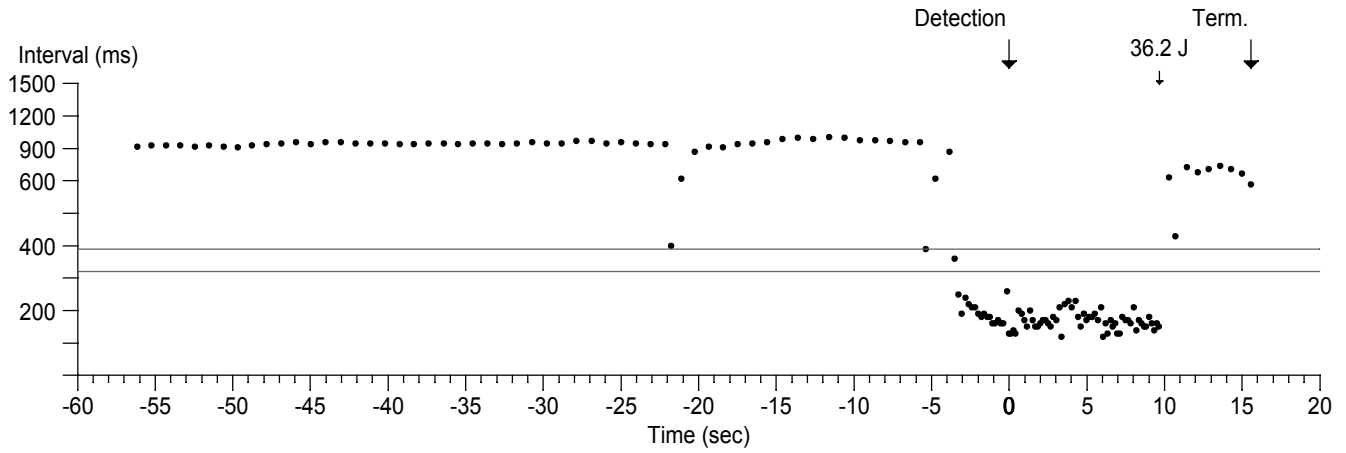

# Treated VT/VF Episode #207

Device: **Evera S VR DVBC3D1**

Serial Number:

Date of Visit: **23-Nov-2020 21:14:00**

Patient:

ID:

**Episode #207 - VF** Chart speed: 25.0 mm/sec

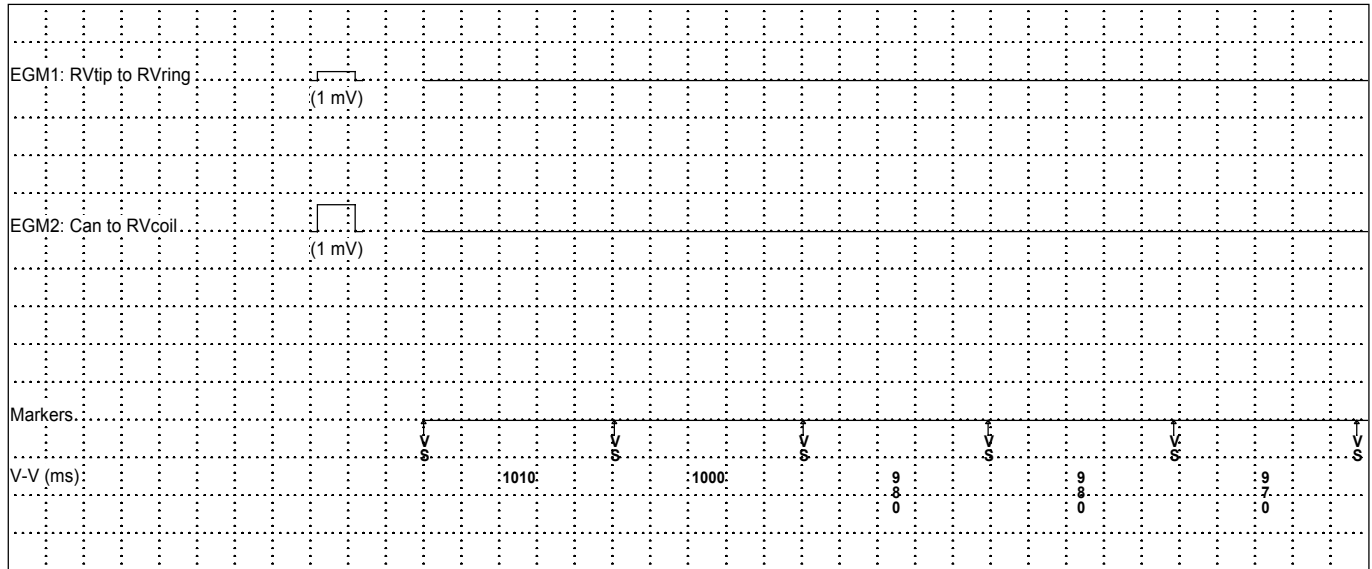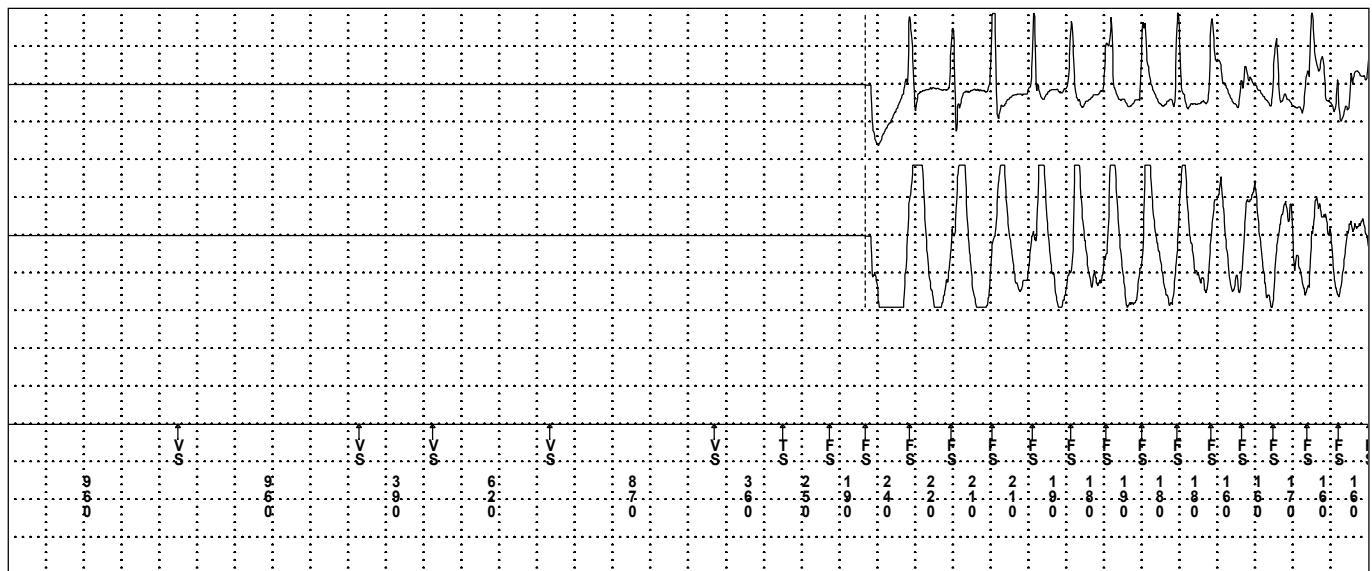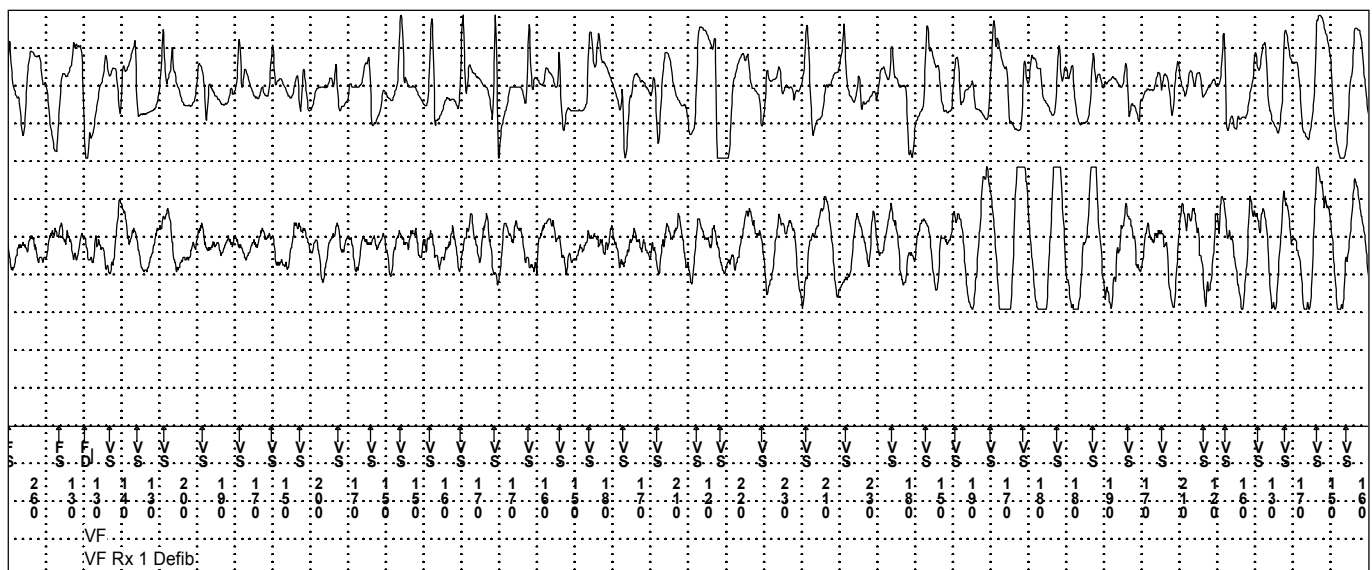

# Treated VT/VF Episode #207

Device: **Evera S VR DVBC3D1**

Serial Number:

Date of Visit: **23-Nov-2020 21:14:00**

Patient:

ID:

**Episode #207 - VF** Chart speed: 25.0 mm/sec

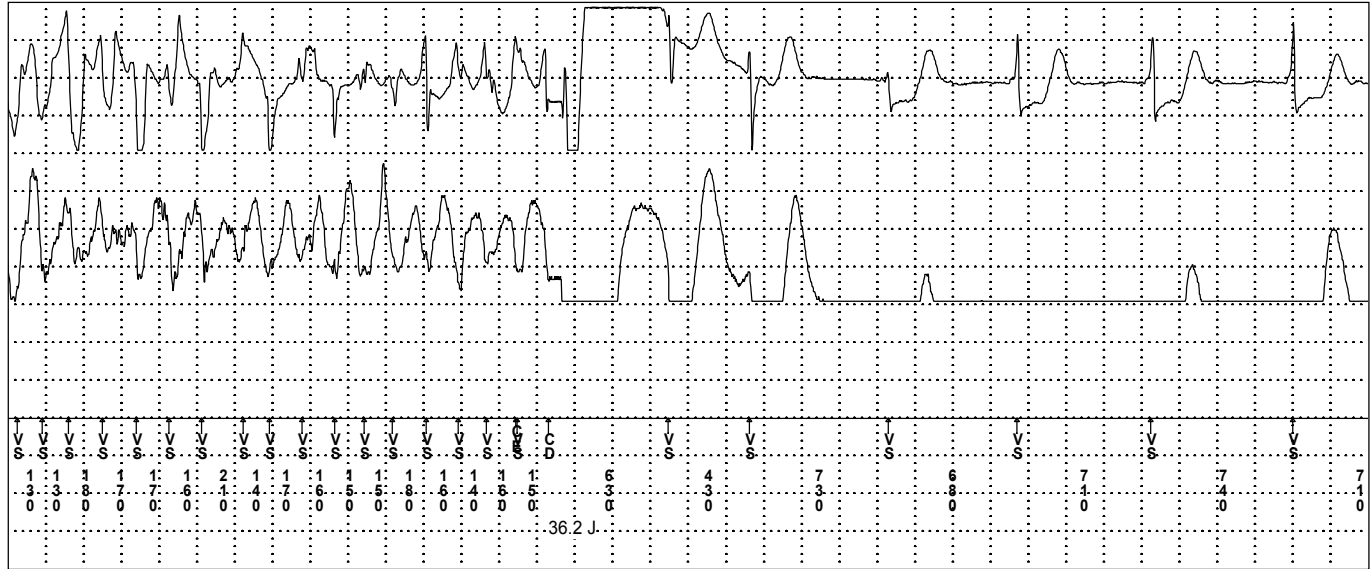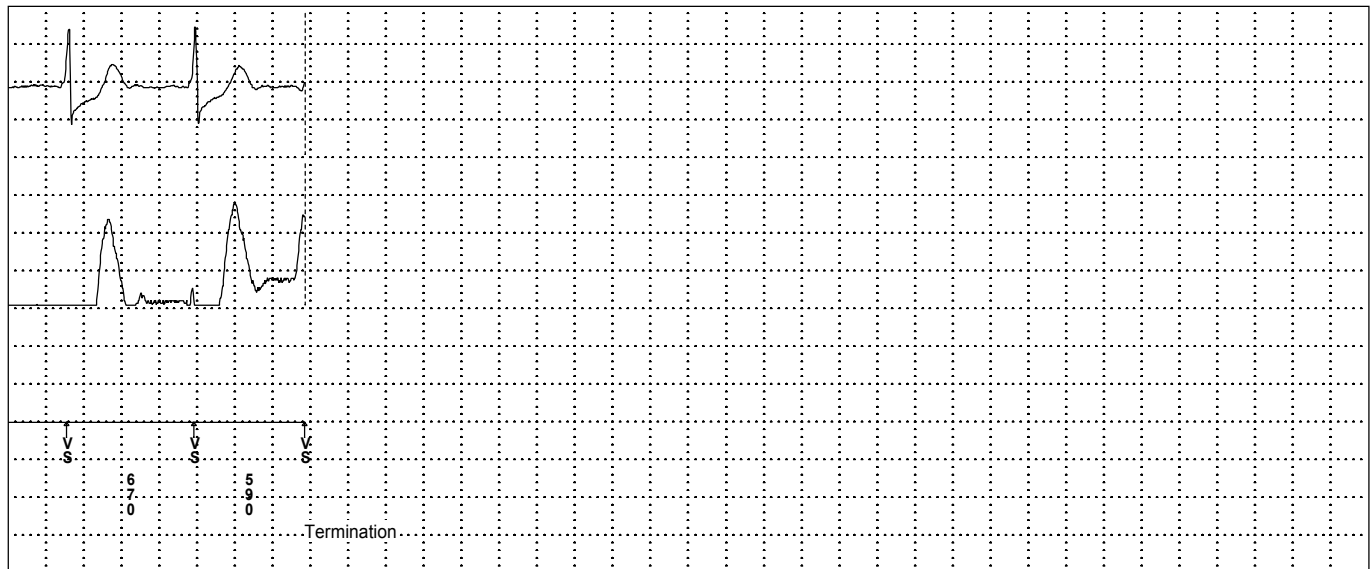

# Treated VT/VF Episode #207

Device: **Evera S VR DVBC3D1**

Serial Number:

Date of Visit: **23-Nov-2020 21:14:00**

Patient:

ID:

Physician:

## Episode #207: 19-Nov-2020 05:00:44

### Episode Summary

Initial Type VF (spontaneous)  
 Duration 14 sec  
 V. Max Rate ---  
 V. Median 333 bpm (180 ms)  
 Activity at onset Rest, Sensor = 46 bpm  
 Last Therapy VF Rx1: Defib, Successful

### Initial VT/VF Detection Withheld By

None

| Therapies     | Delivered | Charge   | Ohms    | Energy     |
|---------------|-----------|----------|---------|------------|
| VF Rx 1 Defib | 36.2 J    | 9.44 sec | 43 ohms | 0.0 - 35 J |

Termination

### Wavelet Measurements Prior to Initial VT/VF Detection

Wavelet Result: Wavelet not applied; interval too fast or too slow  
 Template Status: Inconsistent with intrinsic rhythm

- 8. No Match --- Interval too fast
- 7. No Match --- Interval too fast
- 6. No Match --- Interval too fast
- 5. No Match --- Interval too fast
- 4. No Match --- Interval too fast
- 3. No Match --- Interval too fast
- 2. No Match --- Interval too fast
- 1. No Match --- Interval too fast
- 0. Detection

| Parameter Settings | Initial | Redetect | V. Interval (Rate) |
|--------------------|---------|----------|--------------------|
| VF On              | 18/24   | 9/12     | 320 ms (188 bpm)   |
| FVT Off            |         |          |                    |
| VT On              | 16      | 12       | 390 ms (154 bpm)   |
| Monitor Monitor    | 32      |          | 450 ms (133 bpm)   |

### Wavelet

Wavelet On, Match = 70 %  
 Template 18-Nov-2020, Auto = On  
 SVT V. Limit 260 ms

### Other Enhancements

Stability Off  
 Onset Off  
 High Rate Timeout  
     VF Zone Only 0.75 min  
     All Zones Off  
 TWave On  
 RV Lead Noise On+Timeout  
 Timeout 0.75 min

### Polarity

### RV

Pace Polarity Bipolar  
 Sense Polarity Bipolar

| EGM            | Source          | Range     | Sensitivity |
|----------------|-----------------|-----------|-------------|
| EGM1           | RVtip to RVring | +/- 8 mV  | RV 0.3 mV   |
| EGM2 (Wavelet) | Can to RVcoil   | +/- 12 mV |             |

# Treated VT/VF Episode #207

Device: **Evera S VR DVBC3D1**

Serial Number:

Date of Visit: **23-Nov-2020 21:14:00**

Patient:

ID:

Physician:

| Type | ATP Seq | Shocks | Success | ID# | Date        | Time<br>hh:mm | Duration<br>hh:mm:ss | Avg bpm<br>V | Max bpm<br>V | Activity at<br>Onset |
|------|---------|--------|---------|-----|-------------|---------------|----------------------|--------------|--------------|----------------------|
| VF   | 0       | 35J    | Yes     | 207 | 19-Nov-2020 | 05:00         | :14                  | 353          | ---          | Rest                 |

No Match ---                      No Match ---                      No Match ---                      No Match ---



6 mV  
 20 ms  
 — QRS  
 - - - - Template

No Match ---                      No Match ---                      No Match ---                      No Match ---



# Treated VT/VF Episode #206

Device: **Evera S VR DVBC3D1**

Serial Number:

Date of Visit: **23-Nov-2020 21:14:00**

Patient:

ID:

Physician:

| Type | ATP Seq | Shocks | Success | ID# | Date        | Time<br>hh:mm | Duration<br>hh:mm:ss | Avg bpm<br>V | Max bpm<br>V | Activity at<br>Onset |
|------|---------|--------|---------|-----|-------------|---------------|----------------------|--------------|--------------|----------------------|
| VF   | 0       | 35J    | Yes     | 206 | 17-Nov-2020 | 09:16         | :14                  | 300          | 316          | Rest                 |

• V-V      VF = 320 ms      VT = 390 ms

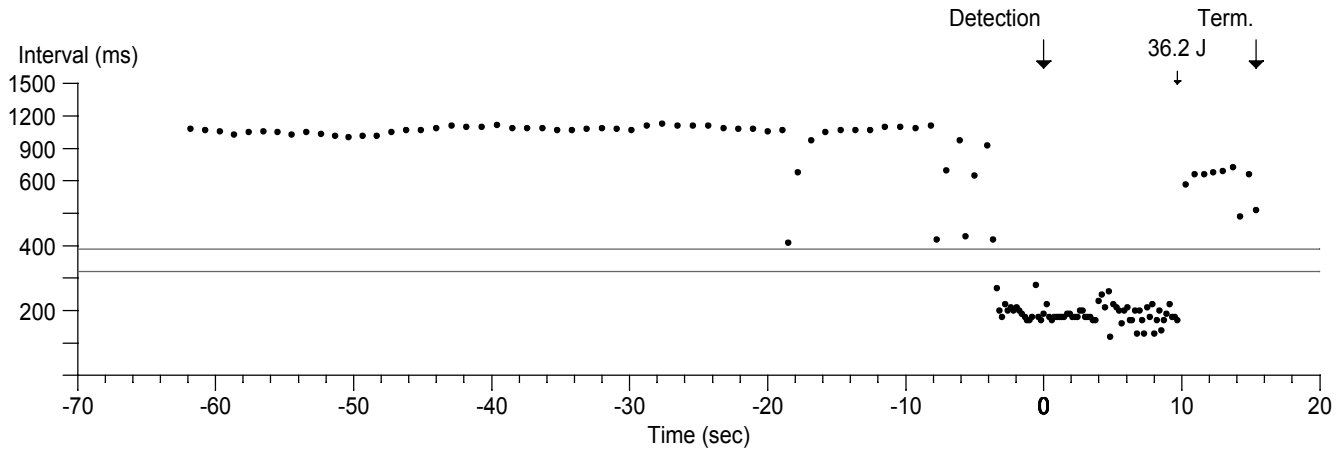





# Treated VT/VF Episode #206

Device: **Evera S VR DVBC3D1**

Serial Number:

Date of Visit: **23-Nov-2020 21:14:00**

Patient:

ID:

**Episode #206 - VF Chart speed: 25.0 mm/sec**

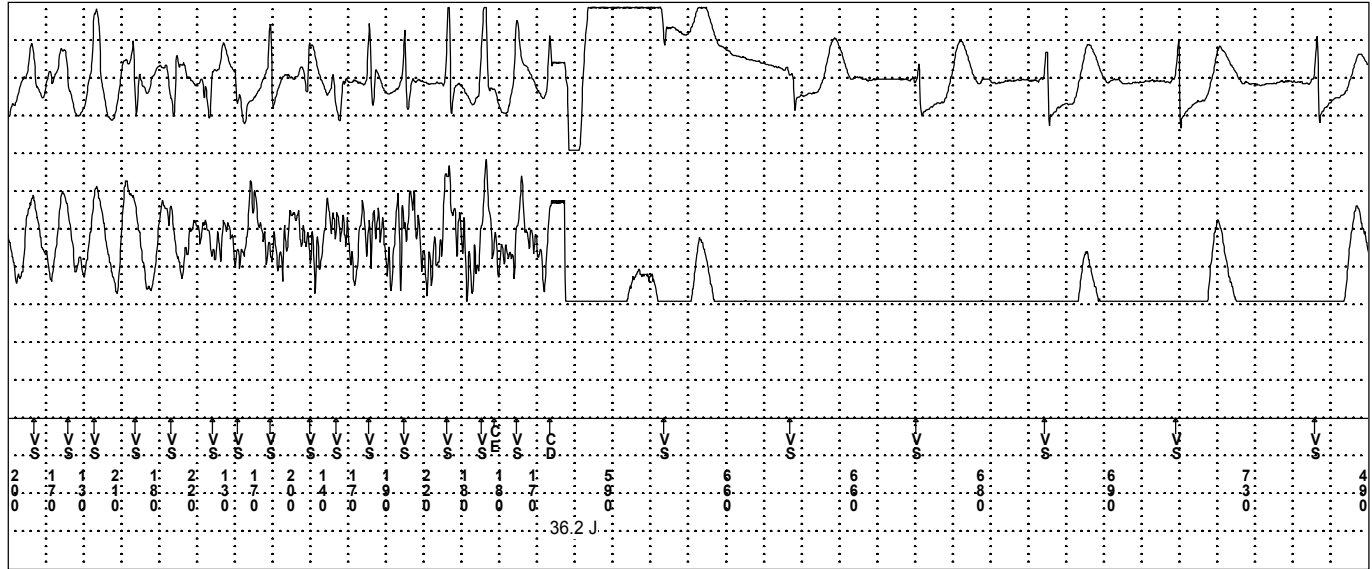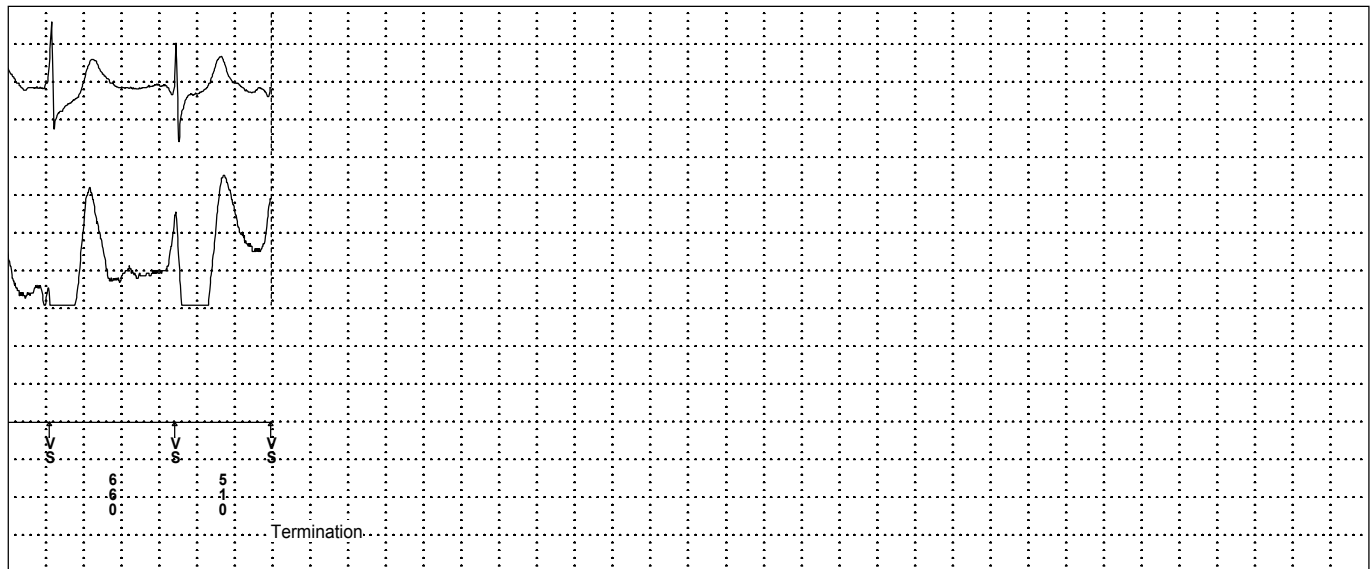

# Treated VT/VF Episode #206

Device: **Evera S VR DVBC3D1**

Serial Number:

Date of Visit: **23-Nov-2020 21:14:00**

Patient:

ID:

Physician:

## Episode #206: 17-Nov-2020 09:16:08

### Episode Summary

Initial Type VF (spontaneous)  
 Duration 14 sec  
 V. Max Rate 316 bpm  
 V. Median 316 bpm (190 ms)  
 Activity at onset Rest, Sensor = 40 bpm  
 Last Therapy VF Rx1: Defib, Successful

### Initial VT/VF Detection Withheld By

None

### Therapies Delivered Charge Ohms Energy

VF Rx 1 Defib 36.2 J 9.34 sec 46 ohms 0.0 - 35 J

Termination

### Wavelet Measurements Prior to Initial VT/VF Detection

Wavelet Result: Wavelet not applied; interval too fast or too slow  
 Template Status: OK

- 8. No Match --- Interval too fast
- 7. No Match --- Interval too fast
- 6. No Match --- Interval too fast
- 5. No Match --- Interval too fast
- 4. No Match --- Interval too fast
- 3. No Match 16 %
- 2. No Match --- Interval too fast
- 1. No Match --- Interval too fast
- 0. Detection

### Parameter Settings Initial Redetect V. Interval (Rate)

VF On 18/24 9/12 320 ms (188 bpm)  
 FVT Off  
 VT On 16 12 390 ms (154 bpm)  
 Monitor Monitor 32 450 ms (133 bpm)

### Wavelet

Wavelet On, Match = 70 %  
 Template 17-Nov-2020, Auto = On  
 SVT V. Limit 260 ms

### Other Enhancements

Stability Off  
 Onset Off  
 High Rate Timeout  
     VF Zone Only 0.75 min  
     All Zones Off  
 TWave On  
 RV Lead Noise On+Timeout  
 Timeout 0.75 min

### Polarity RV

Pace Polarity Bipolar  
 Sense Polarity Bipolar

| EGM            | Source          | Range     | Sensitivity |
|----------------|-----------------|-----------|-------------|
| EGM1           | RVtip to RVring | +/- 8 mV  | RV 0.3 mV   |
| EGM2 (Wavelet) | Can to RVcoil   | +/- 12 mV |             |

# Treated VT/VF Episode #206

Device: **Evera S VR DVBC3D1**

Serial Number:

Date of Visit: **23-Nov-2020 21:14:00**

Patient:

ID:

Physician:

| Type | ATP Seq | Shocks | Success | ID# | Date        | Time<br>hh:mm | Duration<br>hh:mm:ss | Avg bpm<br>V | Max bpm<br>V | Activity at<br>Onset |
|------|---------|--------|---------|-----|-------------|---------------|----------------------|--------------|--------------|----------------------|
| VF   | 0       | 35J    | Yes     | 206 | 17-Nov-2020 | 09:16         | :14                  | 300          | 316          | Rest                 |

No Match ---                      No Match ---                      No Match ---                      No Match ---

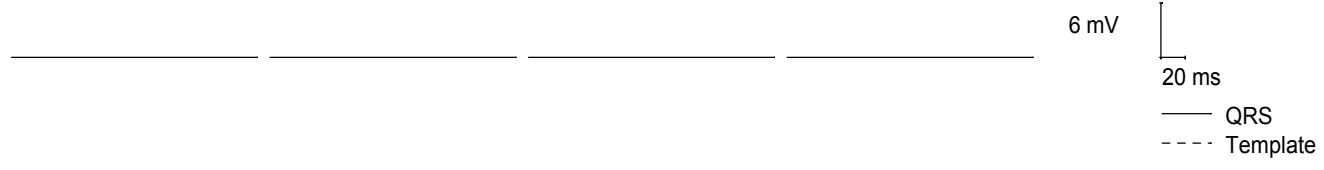

No Match ---                      No Match 16 %                      No Match ---                      No Match ---

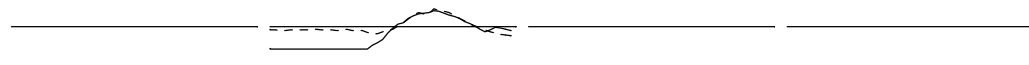

# Treated VT/VF Episode #205

Device: **Evera S VR DVBC3D1**

Serial Number:

Date of Visit: **23-Nov-2020 21:14:00**

Patient:

ID:

Physician:

| Type | ATP Seq | Shocks | Success | ID# | Date        | Time<br>hh:mm | Duration<br>hh:mm:ss | Avg bpm<br>V | Max bpm<br>V | Activity at<br>Onset |
|------|---------|--------|---------|-----|-------------|---------------|----------------------|--------------|--------------|----------------------|
| VF   | 0       | 35J    | Yes     | 205 | 15-Nov-2020 | 08:00         | :14                  | 286          | 300          | Rest                 |

• V-V      VF = 320 ms      VT = 390 ms

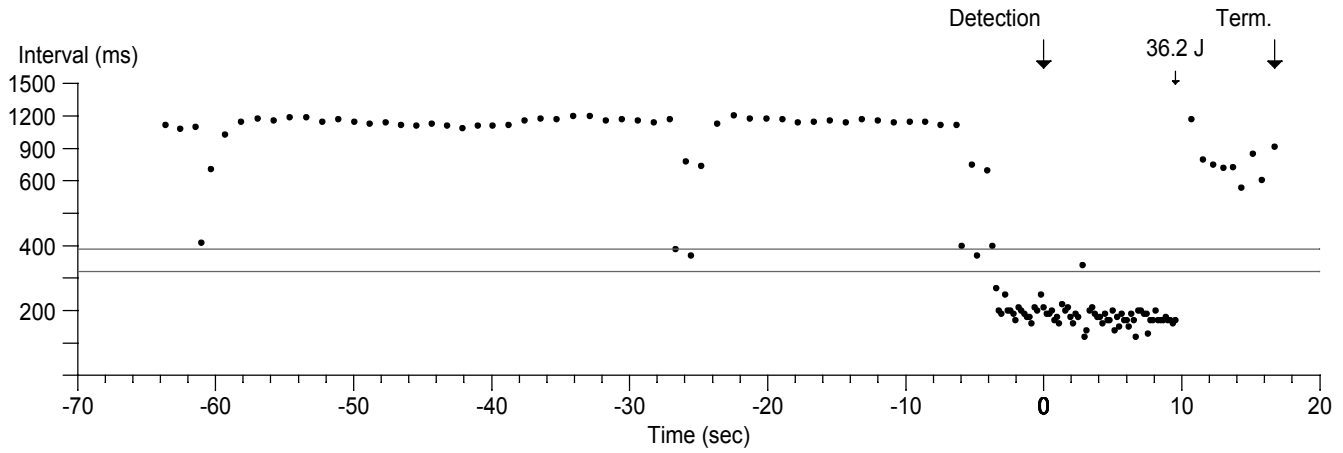

# Treated VT/VF Episode #205

Device: **Evera S VR DVBC3D1**

Serial Number:

Date of Visit: **23-Nov-2020 21:14:00**

Patient:

ID:

**Episode #205 - VF** Chart speed: 25.0 mm/sec

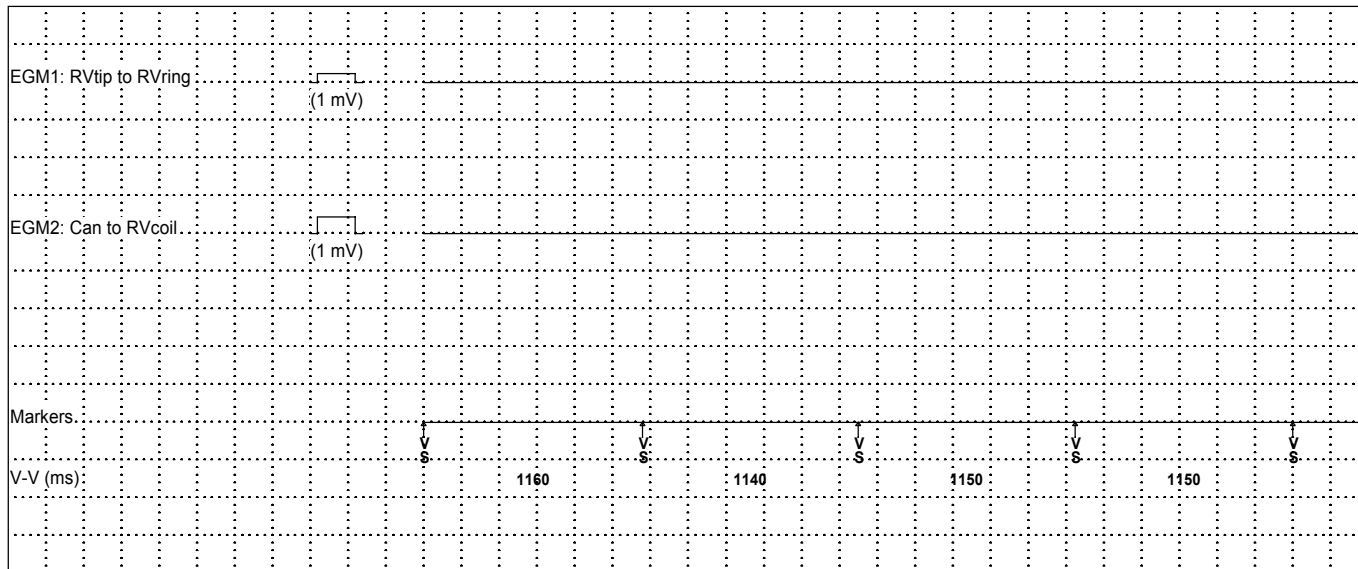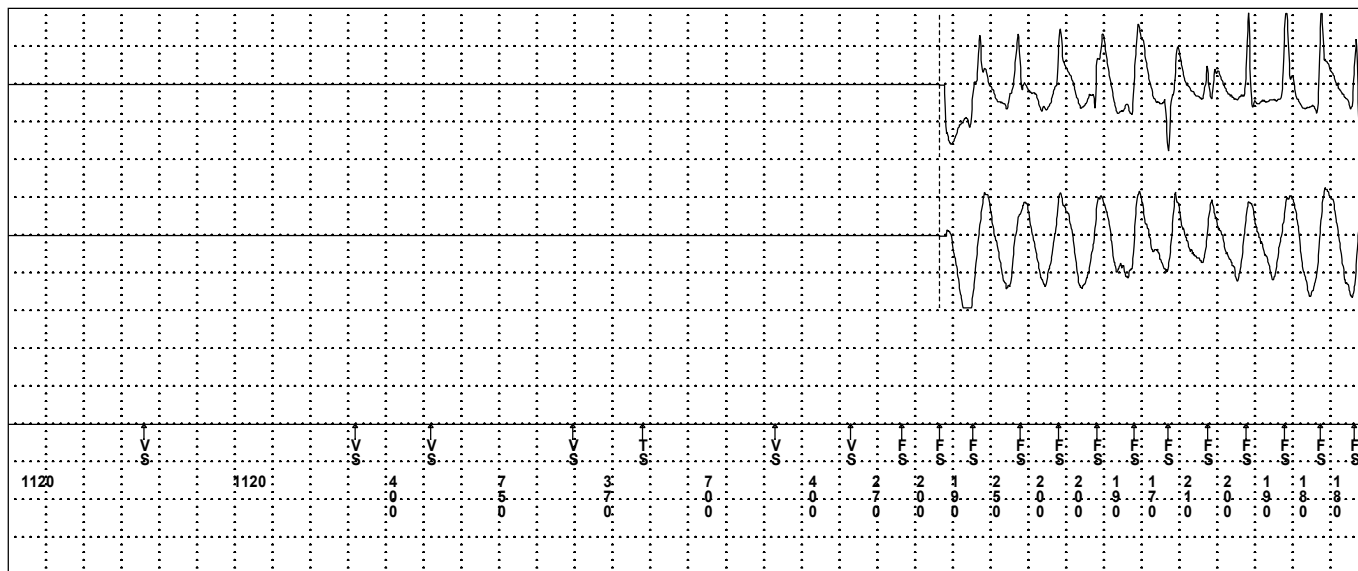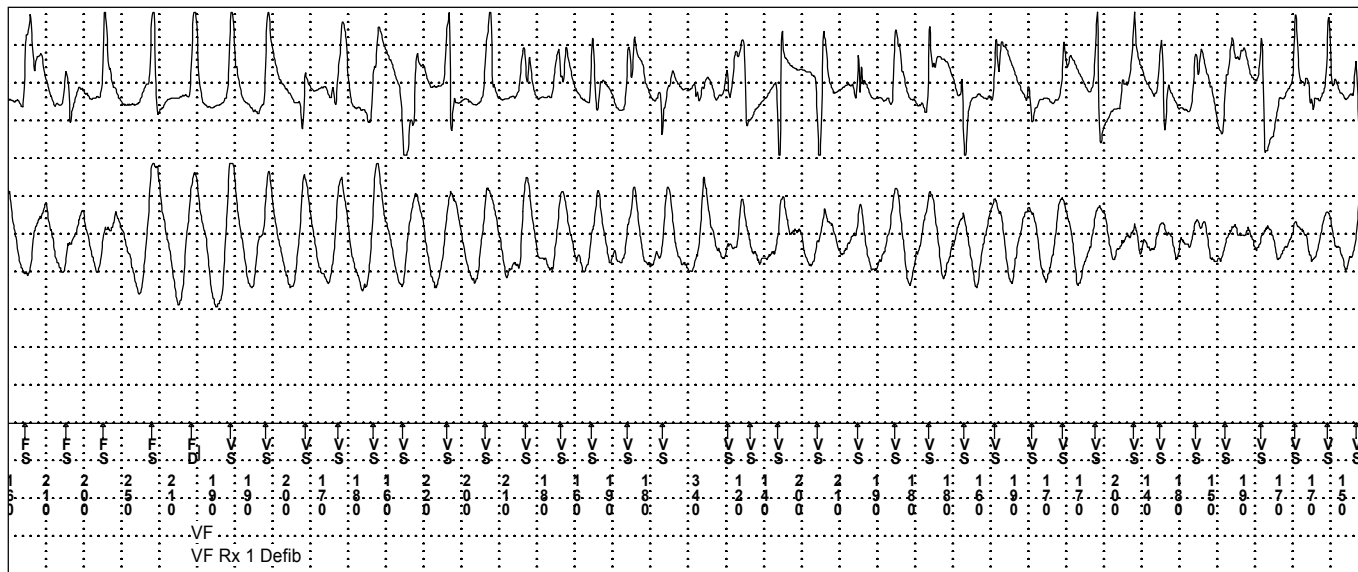



# Treated VT/VF Episode #205

Device: **Evera S VR DVBC3D1**

Serial Number:

Date of Visit: **23-Nov-2020 21:14:00**

Patient:

ID:

Physician:

## Episode #205: 15-Nov-2020 08:00:49

### Episode Summary

Initial Type VF (spontaneous)  
 Duration 14 sec  
 V. Max Rate 300 bpm  
 V. Median 300 bpm (200 ms)  
 Activity at onset Rest, Sensor = 40 bpm  
 Last Therapy VF Rx1: Defib, Successful

### Initial VT/VF Detection Withheld By

None

| Therapies     | Delivered | Charge   | Ohms    | Energy     |
|---------------|-----------|----------|---------|------------|
| VF Rx 1 Defib | 36.2 J    | 9.25 sec | 49 ohms | 0.0 - 35 J |

Termination

### Wavelet Measurements Prior to Initial VT/VF Detection

Wavelet Result: Wavelet not applied; interval too fast or too slow  
 Template Status: OK

- 8. No Match --- Interval too fast
- 7. No Match --- Interval too fast
- 6. No Match --- Interval too fast
- 5. No Match --- Interval too fast
- 4. No Match --- Interval too fast
- 3. No Match --- Interval too fast
- 2. No Match --- Interval too fast
- 1. No Match 22 %
- 0. Detection

| Parameter | Settings | Initial | Redetect | V. Interval (Rate) |
|-----------|----------|---------|----------|--------------------|
| VF        | On       | 18/24   | 9/12     | 320 ms (188 bpm)   |
| FVT       | Off      |         |          |                    |
| VT        | On       | 16      | 12       | 390 ms (154 bpm)   |
| Monitor   | Monitor  | 32      |          | 450 ms (133 bpm)   |

### Wavelet

Wavelet On, Match = 70 %  
 Template 14-Nov-2020, Auto = On  
 SVT V. Limit 260 ms

### Other Enhancements

Stability Off  
 Onset Off  
 High Rate Timeout  
     VF Zone Only 0.75 min  
     All Zones Off  
 TWave On  
 RV Lead Noise On+Timeout  
 Timeout 0.75 min

### Polarity

### RV

Pace Polarity Bipolar  
 Sense Polarity Bipolar

| EGM            | Source          | Range     | Sensitivity |
|----------------|-----------------|-----------|-------------|
| EGM1           | RVtip to RVring | +/- 8 mV  | RV 0.3 mV   |
| EGM2 (Wavelet) | Can to RVcoil   | +/- 12 mV |             |

# Treated VT/VF Episode #205

Device: **Evera S VR DVBC3D1**

Serial Number:

Date of Visit: **23-Nov-2020 21:14:00**

Patient:

ID:

Physician:

| Type | ATP Seq | Shocks | Success | ID# | Date        | Time<br>hh:mm | Duration<br>hh:mm:ss | Avg bpm<br>V | Max bpm<br>V | Activity at<br>Onset |
|------|---------|--------|---------|-----|-------------|---------------|----------------------|--------------|--------------|----------------------|
| VF   | 0       | 35J    | Yes     | 205 | 15-Nov-2020 | 08:00         | :14                  | 286          | 300          | Rest                 |

No Match ---                      No Match ---                      No Match ---                      No Match ---



6 mV  
20 ms  
— QRS  
- - - - Template

No Match ---                      No Match ---                      No Match ---                      No Match 22 %

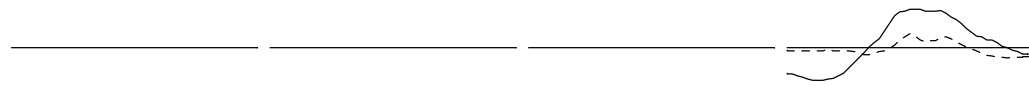



# Treated VT/VF Episode #204

Device: **Evera S VR DVBC3D1**

Serial Number:

Date of Visit: **23-Nov-2020 21:14:00**

Patient:

ID:

Physician:

| Type | ATP Seq | Shocks | Success | ID# | Date        | Time<br>hh:mm | Duration<br>hh:mm:ss | Avg bpm<br>V | Max bpm<br>V | Activity at<br>Onset |
|------|---------|--------|---------|-----|-------------|---------------|----------------------|--------------|--------------|----------------------|
| VF   | 0       | 35J    | Yes     | 204 | 13-Nov-2020 | 05:49         | :14                  | 316          | 333          | Rest                 |

• V-V      VF = 320 ms      VT = 390 ms

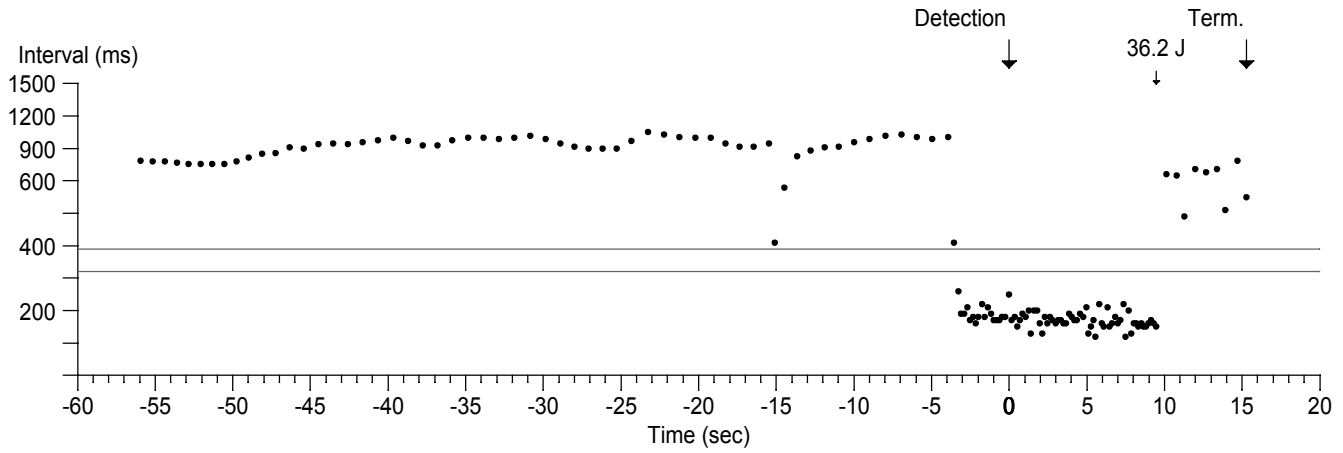





# Treated VT/VF Episode #204

 Device: **Evera S VR DVBC3D1**

Serial Number:

 Date of Visit: **23-Nov-2020 21:14:00**

Patient:

ID:

Physician:

## Episode #204: 13-Nov-2020 05:49:45

### Episode Summary

Initial Type VF (spontaneous)  
 Duration 14 sec  
 V. Max Rate 333 bpm  
 V. Median 333 bpm (180 ms)  
 Activity at onset Rest, Sensor = 40 bpm  
 Last Therapy VF Rx1: Defib, Successful

### Initial VT/VF Detection Withheld By

None

| Therapies     | Delivered | Charge   | Ohms    | Energy     |
|---------------|-----------|----------|---------|------------|
| VF Rx 1 Defib | 36.2 J    | 9.17 sec | 46 ohms | 0.0 - 35 J |

Termination

### Wavelet Measurements Prior to Initial VT/VF Detection

Wavelet Result: Wavelet not applied; interval too fast or too slow  
 Template Status: OK

- 8. No Match --- Interval too fast
- 7. No Match --- Interval too fast
- 6. No Match --- Interval too fast
- 5. No Match --- Interval too fast
- 4. No Match --- Interval too fast
- 3. No Match --- Interval too fast
- 2. No Match --- Interval too fast
- 1. No Match --- Interval too fast
- 0. Detection

| Parameter Settings | Initial | Redetect | V. Interval (Rate) |
|--------------------|---------|----------|--------------------|
| VF On              | 18/24   | 9/12     | 320 ms (188 bpm)   |
| FVT Off            |         |          |                    |
| VT On              | 16      | 12       | 390 ms (154 bpm)   |
| Monitor Monitor    | 32      |          | 450 ms (133 bpm)   |

### Wavelet

Wavelet On, Match = 70 %  
 Template 13-Nov-2020, Auto = On  
 SVT V. Limit 260 ms

### Other Enhancements

Stability Off  
 Onset Off  
 High Rate Timeout  
     VF Zone Only 0.75 min  
     All Zones Off  
 TWave On  
 RV Lead Noise On+Timeout  
 Timeout 0.75 min

| Polarity       | RV      |
|----------------|---------|
| Pace Polarity  | Bipolar |
| Sense Polarity | Bipolar |

| EGM            | Source          | Range     | Sensitivity |
|----------------|-----------------|-----------|-------------|
| EGM1           | RVtip to RVring | +/- 8 mV  | RV 0.3 mV   |
| EGM2 (Wavelet) | Can to RVcoil   | +/- 12 mV |             |

# Treated VT/VF Episode #204

Device: **Evera S VR DVBC3D1**

Serial Number:

Date of Visit: **23-Nov-2020 21:14:00**

Patient:

ID:

Physician:

| Type | ATP Seq | Shocks | Success | ID# | Date        | Time<br>hh:mm | Duration<br>hh:mm:ss | Avg bpm<br>V | Max bpm<br>V | Activity at<br>Onset |
|------|---------|--------|---------|-----|-------------|---------------|----------------------|--------------|--------------|----------------------|
| VF   | 0       | 35J    | Yes     | 204 | 13-Nov-2020 | 05:49         | :14                  | 316          | 333          | Rest                 |

No Match ---                      No Match ---                      No Match ---                      No Match ---



6 mV  
 20 ms  
 — QRS  
 - - - - Template

No Match ---                      No Match ---                      No Match ---                      No Match ---



# Monitored VT Episode #203

Device: **Evera S VR DVBC3D1**

Serial Number:

Date of Visit: **23-Nov-2020 21:14:00**

Patient:

ID:

Physician:

| Type   | ATP Seq | Shocks | Success ID# | Date        | Time hh:mm | Duration hh:mm:ss | Avg bpm V | Max bpm V | Activity at Onset |
|--------|---------|--------|-------------|-------------|------------|-------------------|-----------|-----------|-------------------|
| VT-Mon |         |        | 203         | 12-Nov-2020 | 10:20      | :01:13            | 144       | 154       | Active            |

• V-V                      VTM = 450 ms

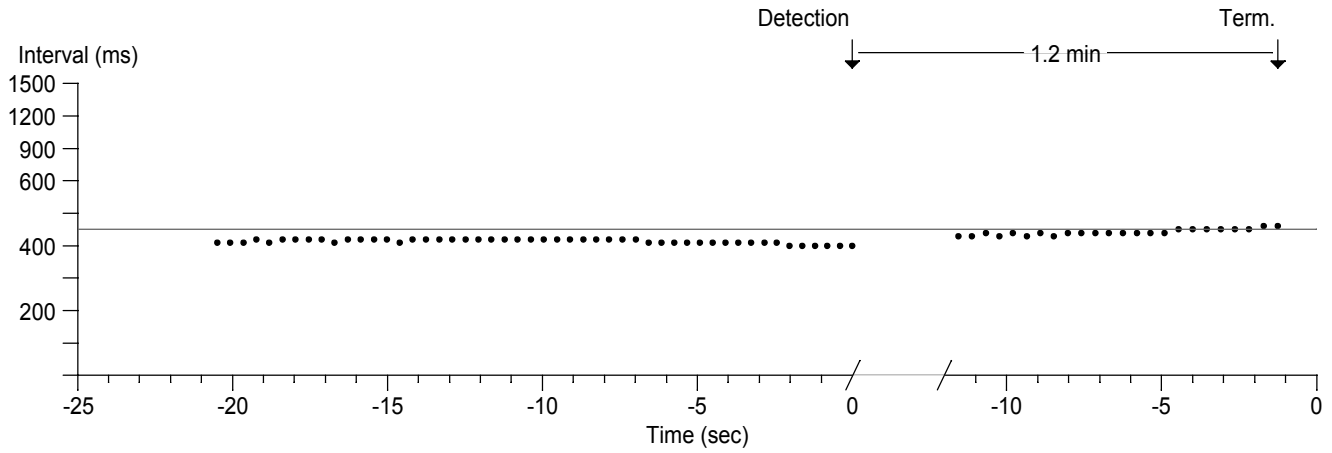

# Monitored VT Episode #203

Device: **Evera S VR DVBC3D1**

Serial Number:

Date of Visit: **23-Nov-2020 21:14:00**

Patient:

ID:

**Episode #203** Chart speed: 25.0 mm/sec

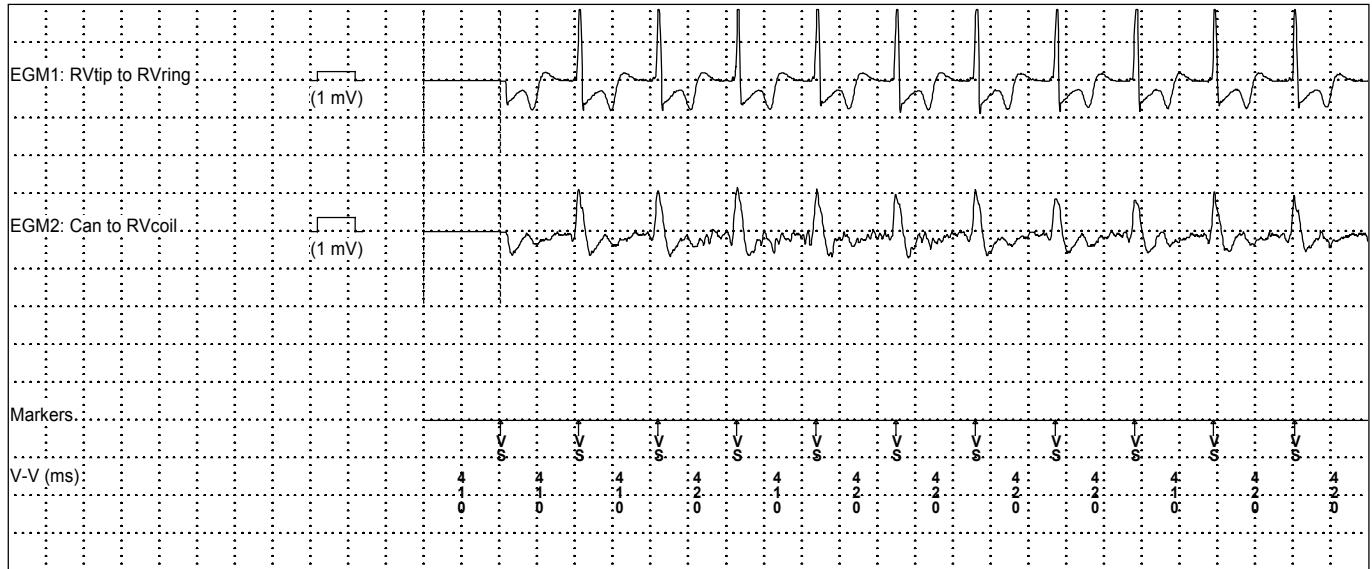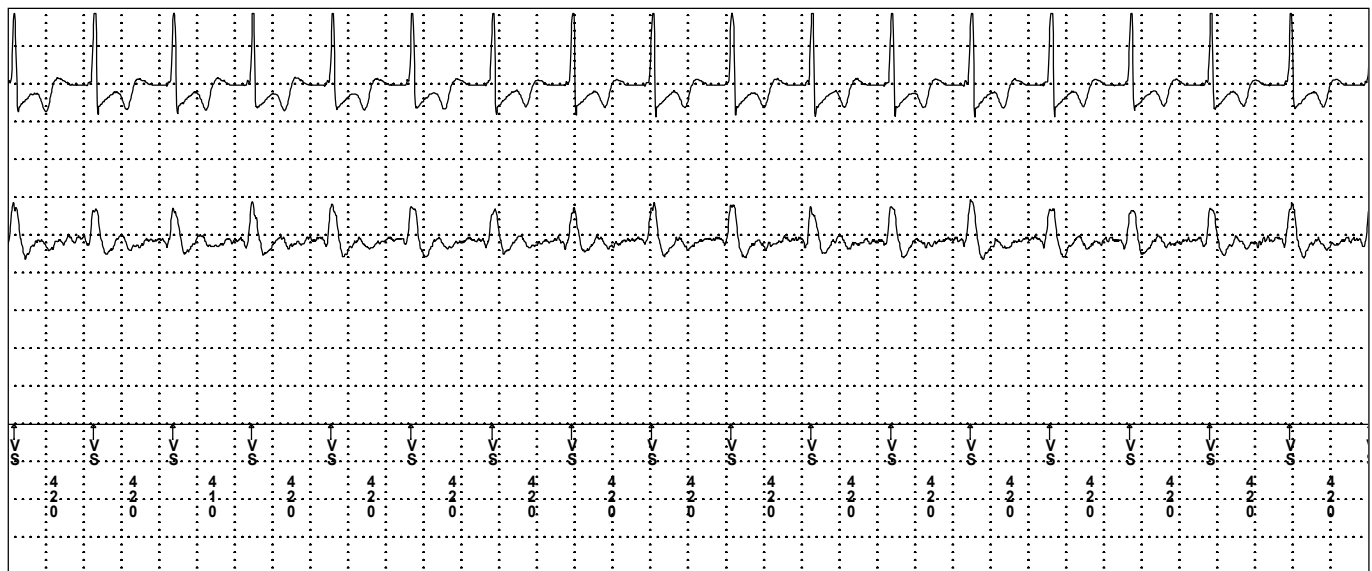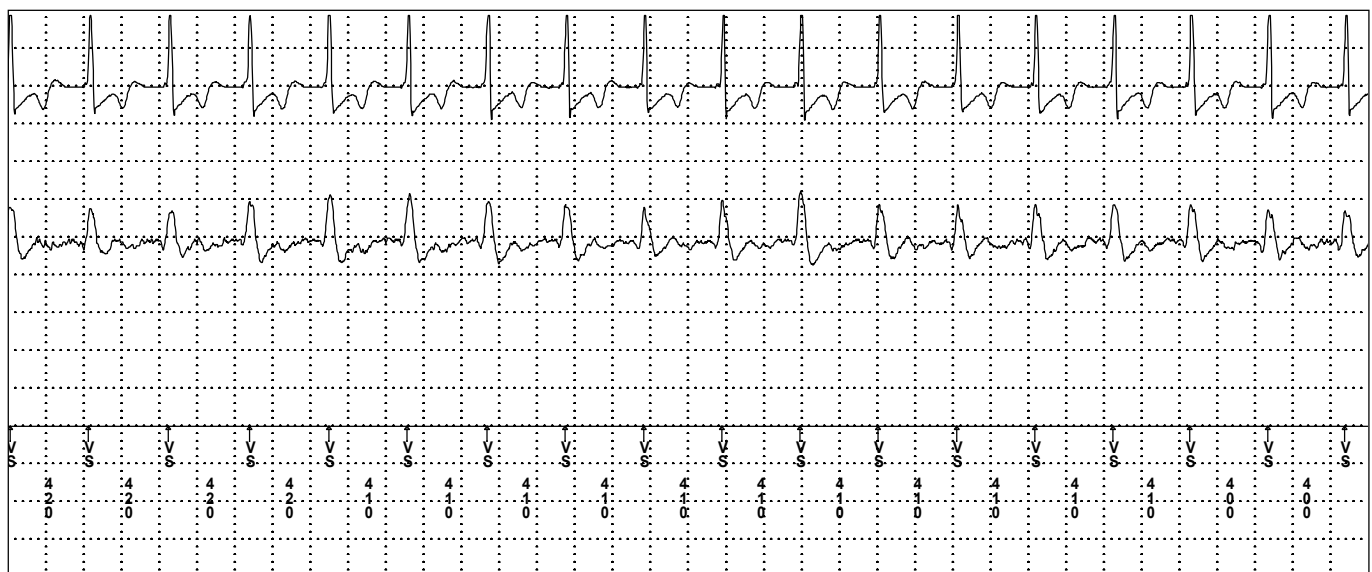





# Monitored VT Episode #203

Device: **Evera S VR DVBC3D1**

Serial Number:

Date of Visit: **23-Nov-2020 21:14:00**

Patient:

ID:

Physician:

## Episode #203: 12-Nov-2020 10:20:41

### Episode Summary

Initial Type VT Monitor (spontaneous)  
Duration 1.2 min  
V. Max Rate 154 bpm  
V. Median 146 bpm (410 ms)  
Activity at onset Active, Sensor = 102 bpm

### Wavelet Measurements Prior to Initial VT Detection

Wavelet Result: VT/VF  
Template Status: OK

-8. No Match 58 %  
-7. No Match 61 %  
-6. No Match 61 %  
-5. No Match 58 %  
-4. No Match 52 %  
-3. No Match 61 %  
-2. No Match 55 %  
-1. No Match 52 %  
0. Detection

| Parameter | Settings | Initial | Redetect | V. Interval (Rate) |
|-----------|----------|---------|----------|--------------------|
| VF        | On       | 18/24   | 9/12     | 320 ms (188 bpm)   |
| FVT       | Off      |         |          |                    |
| VT        | On       | 16      | 12       | 390 ms (154 bpm)   |
| Monitor   | Monitor  | 32      |          | 450 ms (133 bpm)   |

### Wavelet

Wavelet On, Match = 70 %  
Template 12-Nov-2020, Auto = On  
SVT V. Limit 260 ms

### Other Enhancements

Stability Off  
Onset Off  
High Rate Timeout  
VF Zone Only 0.75 min  
All Zones Off  
TWave On  
RV Lead Noise On+Timeout  
Timeout 0.75 min

### Polarity

### RV

Pace Polarity Bipolar  
Sense Polarity Bipolar

| EGM            | Source          | Range     | Sensitivity |
|----------------|-----------------|-----------|-------------|
| EGM1           | RVtip to RVring | +/- 8 mV  | RV 0.3 mV   |
| EGM2 (Wavelet) | Can to RVcoil   | +/- 12 mV |             |

# Monitored VT Episode #203

Device: **Evera S VR DVBC3D1**

Serial Number:

Date of Visit: **23-Nov-2020 21:14:00**

Patient:

ID:

Physician:

| Type   | ATP Seq | Shocks | Success | ID# | Date        | Time<br>hh:mm | Duration<br>hh:mm:ss | Avg bpm<br>V | Max bpm<br>V | Activity at<br>Onset |
|--------|---------|--------|---------|-----|-------------|---------------|----------------------|--------------|--------------|----------------------|
| VT-Mon |         |        |         | 203 | 12-Nov-2020 | 10:20         | :01:13               | 144          | 154          | Active               |

No Match 58 %      No Match 61 %      No Match 61 %      No Match 58 %

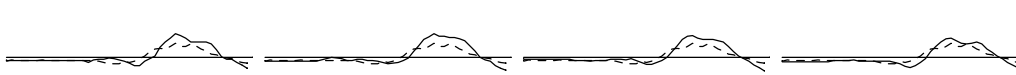

6 mV  
20 ms  
— QRS  
- - - Template

No Match 52 %      No Match 61 %      No Match 55 %      No Match 52 %

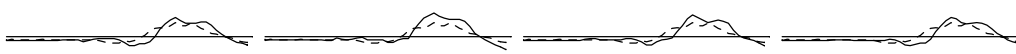

# Treated VT/VF Episode #202

Device: **Evera S VR DVBC3D1**

Serial Number:

Date of Visit: **23-Nov-2020 21:14:00**

Patient:

ID:

Physician:

| Type | ATP Seq | Shocks | Success | ID# | Date        | Time<br>hh:mm | Duration<br>hh:mm:ss | Avg bpm<br>V | Max bpm<br>V | Activity at<br>Onset |
|------|---------|--------|---------|-----|-------------|---------------|----------------------|--------------|--------------|----------------------|
| VT   | 1       |        | Yes     | 202 | 12-Nov-2020 | 10:20         | :08                  | 158          | 158          | Active               |

• V-V      VF = 320 ms      VT = 390 ms

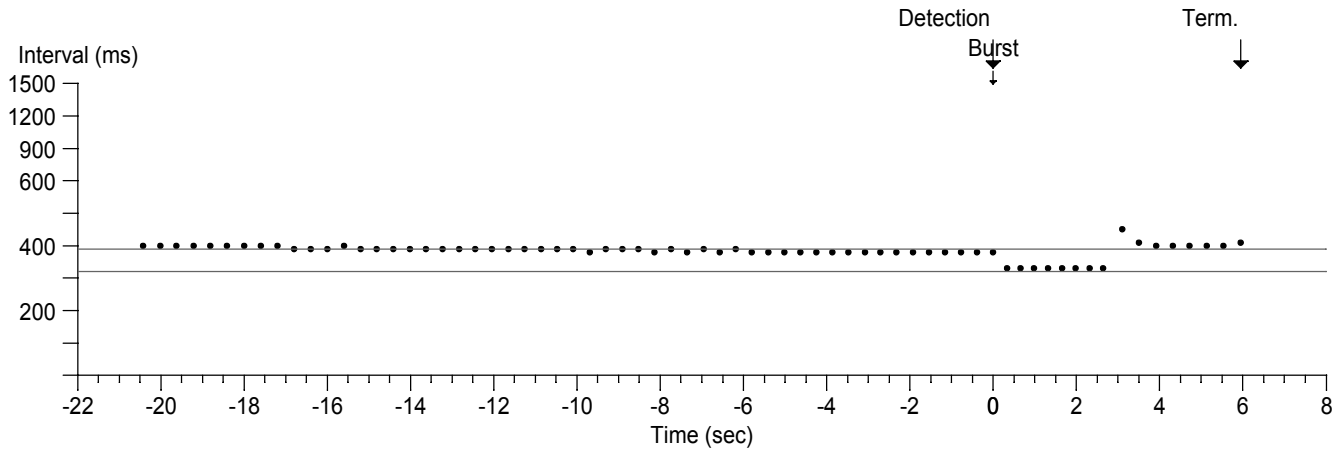



# Treated VT/VF Episode #202

Device: **Evera S VR DVBC3D1**

Serial Number:

Date of Visit: **23-Nov-2020 21:14:00**

Patient:

ID:

**Episode #202 - VT** Chart speed: 25.0 mm/sec

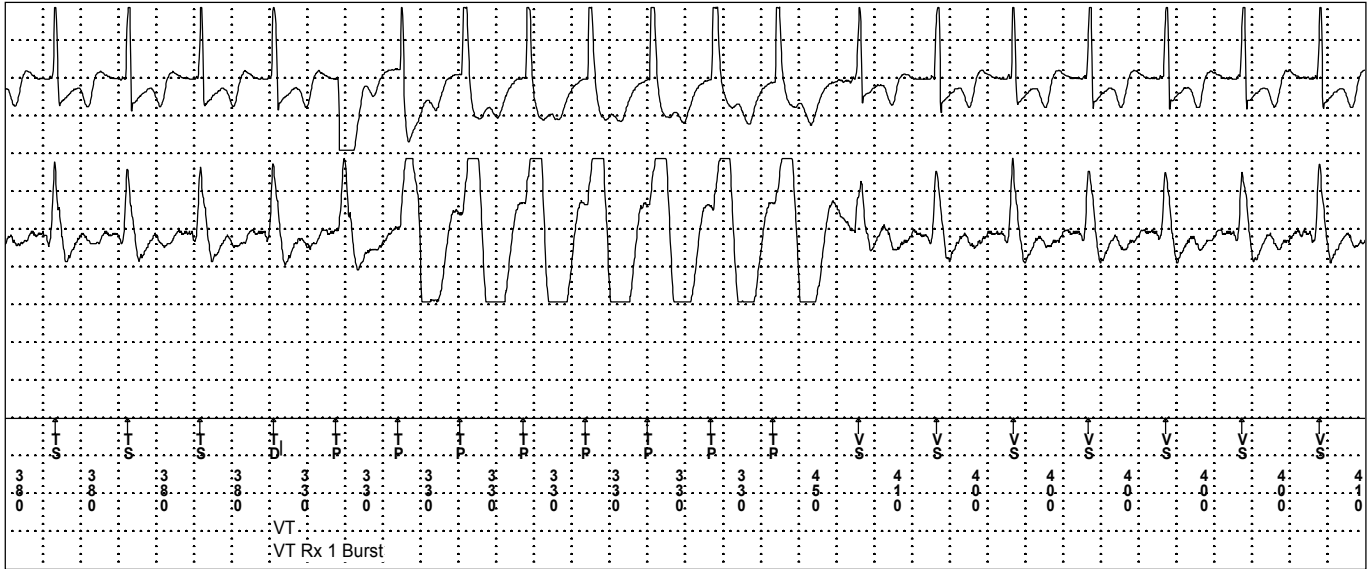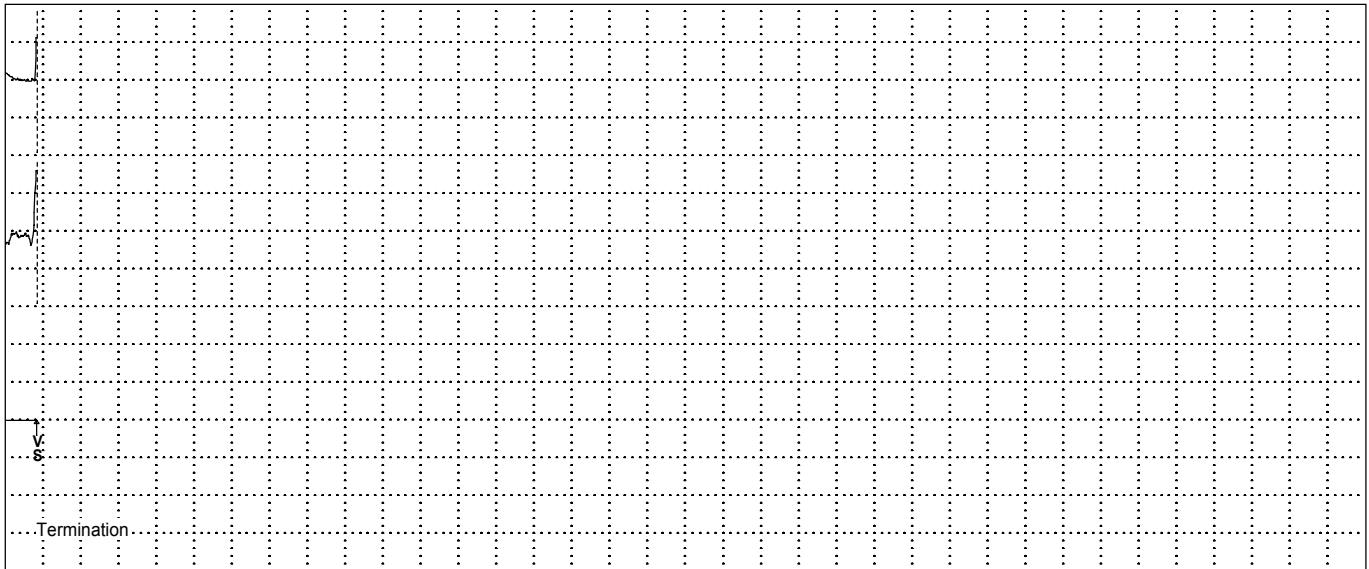

# Treated VT/VF Episode #202

 Device: **Evera S VR DVBC3D1**

Serial Number:

 Date of Visit: **23-Nov-2020 21:14:00**

Patient:

ID:

Physician:

## Episode #202: 12-Nov-2020 10:20:14

### Episode Summary

|                   |                           |
|-------------------|---------------------------|
| Initial Type      | VT (spontaneous)          |
| Duration          | 8 sec                     |
| V. Max Rate       | 158 bpm                   |
| V. Median         | 158 bpm (380 ms)          |
| V. Stability      | 0 ms - 0 ms               |
| Activity at onset | Active, Sensor = 102 bpm  |
| Last Therapy      | VT Rx1: Burst, Successful |

### Initial VT/VF Detection Withheld By

None

### Therapies Delivered Charge Ohms Energy

|               |       |
|---------------|-------|
| VT Rx 1 Burst | Seq 1 |
|---------------|-------|

Termination

### Wavelet Measurements Prior to Initial VT/VF Detection

Wavelet Result: VT/VF

Template Status: OK

- 8. No Match 55 %
- 7. No Match 55 %
- 6. No Match 67 %
- 5. No Match 64 %
- 4. No Match 58 %
- 3. No Match 58 %
- 2. No Match 61 %
- 1. No Match 55 %
- 0. Detection

### Parameter Settings Initial Redetect V. Interval (Rate)

|         |         |       |      |                  |
|---------|---------|-------|------|------------------|
| VF      | On      | 18/24 | 9/12 | 320 ms (188 bpm) |
| FVT     | Off     |       |      |                  |
| VT      | On      | 16    | 12   | 390 ms (154 bpm) |
| Monitor | Monitor | 32    |      | 450 ms (133 bpm) |

### Wavelet

|              |                        |
|--------------|------------------------|
| Wavelet      | On, Match = 70 %       |
| Template     | 12-Nov-2020, Auto = On |
| SVT V. Limit | 260 ms                 |

### Other Enhancements

|                   |            |
|-------------------|------------|
| Stability         | Off        |
| Onset             | Off        |
| High Rate Timeout |            |
| VF Zone Only      | 0.75 min   |
| All Zones         | Off        |
| TWave             | On         |
| RV Lead Noise     | On+Timeout |
| Timeout           | 0.75 min   |

### Polarity RV

|                |         |
|----------------|---------|
| Pace Polarity  | Bipolar |
| Sense Polarity | Bipolar |

| EGM            | Source          | Range     | Sensitivity |
|----------------|-----------------|-----------|-------------|
| EGM1           | RVtip to RVring | +/- 8 mV  | RV 0.3 mV   |
| EGM2 (Wavelet) | Can to RVcoil   | +/- 12 mV |             |

# Treated VT/VF Episode #202

Device: **Evera S VR DVBC3D1**

Serial Number:

Date of Visit: **23-Nov-2020 21:14:00**

Patient:

ID:

Physician:

| Type | ATP Seq | Shocks | Success | ID# | Date        | Time<br>hh:mm | Duration<br>hh:mm:ss | Avg bpm<br>V | Max bpm<br>V | Activity at<br>Onset |
|------|---------|--------|---------|-----|-------------|---------------|----------------------|--------------|--------------|----------------------|
| VT   | 1       |        | Yes     | 202 | 12-Nov-2020 | 10:20         | :08                  | 158          | 158          | Active               |

No Match 55 %      No Match 55 %      No Match 67 %      No Match 64 %

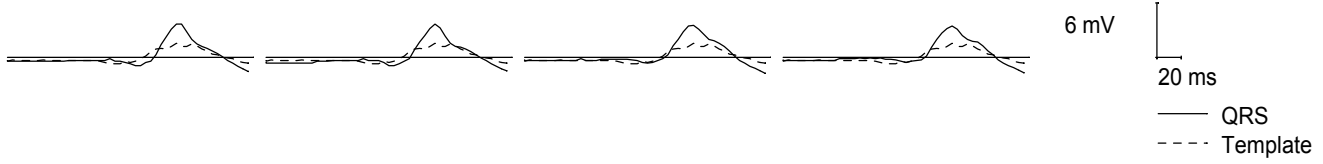

No Match 58 %      No Match 58 %      No Match 61 %      No Match 55 %

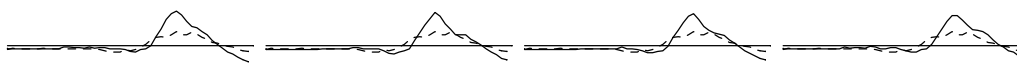

# Treated VT/VF Episode #200

Device: **Evera S VR DVBC3D1**

Serial Number:

Date of Visit: **23-Nov-2020 21:14:00**

Patient:

ID:

Physician:

| Type | ATP Seq | Shocks | Success | ID# | Date        | Time<br>hh:mm | Duration<br>hh:mm:ss | Avg bpm<br>V | Max bpm<br>V | Activity at<br>Onset |
|------|---------|--------|---------|-----|-------------|---------------|----------------------|--------------|--------------|----------------------|
| VF   | 0       | 35J    | Yes     | 200 | 09-Nov-2020 | 04:50         | :13                  | 353          | ---          | Rest                 |

• V-V      VF = 320 ms      VT = 390 ms

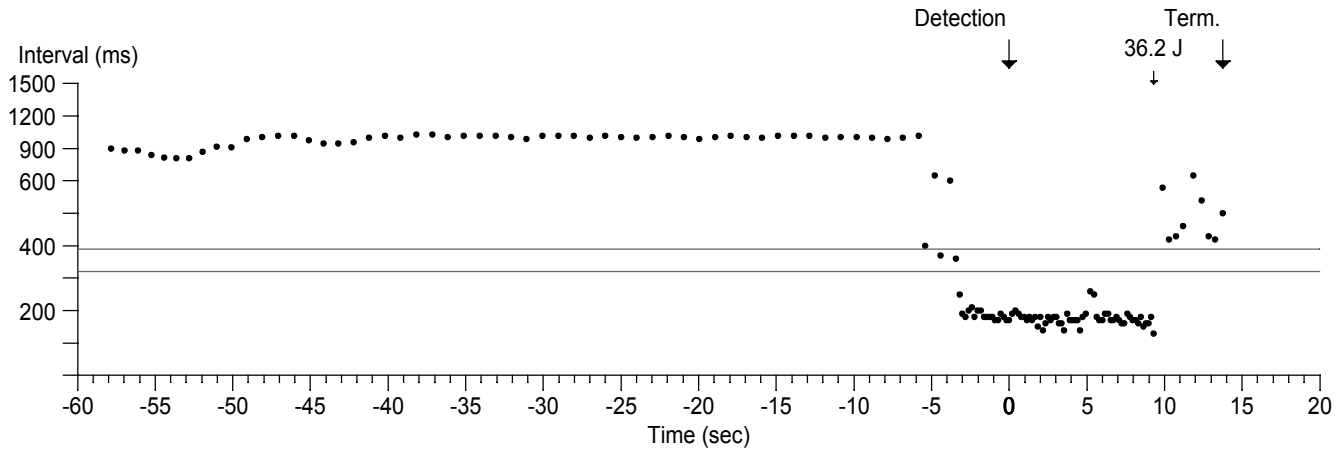







# Treated VT/VF Episode #200

 Device: **Evera S VR DVBC3D1**

Serial Number:

 Date of Visit: **23-Nov-2020 21:14:00**

Patient:

ID:

Physician:

## Episode #200: 09-Nov-2020 04:50:51

### Episode Summary

Initial Type VF (spontaneous)  
 Duration 13 sec  
 V. Max Rate ---  
 V. Median 333 bpm (180 ms)  
 Activity at onset Rest, Sensor = 50 bpm  
 Last Therapy VF Rx1: Defib, Successful

### Initial VT/VF Detection Withheld By

None

| Therapies     | Delivered | Charge   | Ohms    | Energy     |
|---------------|-----------|----------|---------|------------|
| VF Rx 1 Defib | 36.2 J    | 9.02 sec | 45 ohms | 0.0 - 35 J |

Termination

### Wavelet Measurements Prior to Initial VT/VF Detection

Wavelet Result: Wavelet not applied; interval too fast or too slow  
 Template Status: OK

- 8. No Match --- Interval too fast
- 7. No Match --- Interval too fast
- 6. No Match --- Interval too fast
- 5. No Match --- Interval too fast
- 4. No Match --- Interval too fast
- 3. No Match --- Interval too fast
- 2. No Match --- Interval too fast
- 1. No Match --- Interval too fast
- 0. Detection

| Parameter Settings | Initial | Redetect | V. Interval (Rate) |
|--------------------|---------|----------|--------------------|
| VF On              | 18/24   | 9/12     | 320 ms (188 bpm)   |
| FVT Off            |         |          |                    |
| VT On              | 16      | 12       | 390 ms (154 bpm)   |
| Monitor Monitor    | 32      |          | 450 ms (133 bpm)   |

### Wavelet

Wavelet On, Match = 70 %  
 Template 08-Nov-2020, Auto = On  
 SVT V. Limit 260 ms

### Other Enhancements

Stability Off  
 Onset Off  
 High Rate Timeout  
     VF Zone Only 0.75 min  
     All Zones Off  
 TWave On  
 RV Lead Noise On+Timeout  
 Timeout 0.75 min

### Polarity

### RV

Pace Polarity Bipolar  
 Sense Polarity Bipolar

| EGM            | Source          | Range     | Sensitivity |
|----------------|-----------------|-----------|-------------|
| EGM1           | RVtip to RVring | +/- 8 mV  | RV 0.3 mV   |
| EGM2 (Wavelet) | Can to RVcoil   | +/- 12 mV |             |

# Treated VT/VF Episode #200

Device: **Evera S VR DVBC3D1**

Serial Number:

Date of Visit: **23-Nov-2020 21:14:00**

Patient:

ID:

Physician:

| Type | ATP Seq | Shocks | Success | ID# | Date        | Time<br>hh:mm | Duration<br>hh:mm:ss | Avg bpm<br>V | Max bpm<br>V | Activity at<br>Onset |
|------|---------|--------|---------|-----|-------------|---------------|----------------------|--------------|--------------|----------------------|
| VF   | 0       | 35J    | Yes     | 200 | 09-Nov-2020 | 04:50         | :13                  | 353          | ---          | Rest                 |

No Match ---                      No Match ---                      No Match ---                      No Match ---



6 mV  
 20 ms  
 — QRS  
 - - - - Template

No Match ---                      No Match ---                      No Match ---                      No Match ---



# Treated VT/VF Episode #199

Device: **Evera S VR DVBC3D1**

Serial Number:

Date of Visit: **23-Nov-2020 21:14:00**

Patient:

ID:

Physician:

| Type | ATP Seq | Shocks | Success | ID# | Date        | Time<br>hh:mm | Duration<br>hh:mm:ss | Avg bpm<br>V | Max bpm<br>V | Activity at<br>Onset |
|------|---------|--------|---------|-----|-------------|---------------|----------------------|--------------|--------------|----------------------|
| VF   | 0       | 35J    | Yes     | 199 | 06-Nov-2020 | 05:06         | :15                  | 333          | ---          | Rest                 |

• V-V      VF = 320 ms      VT = 390 ms

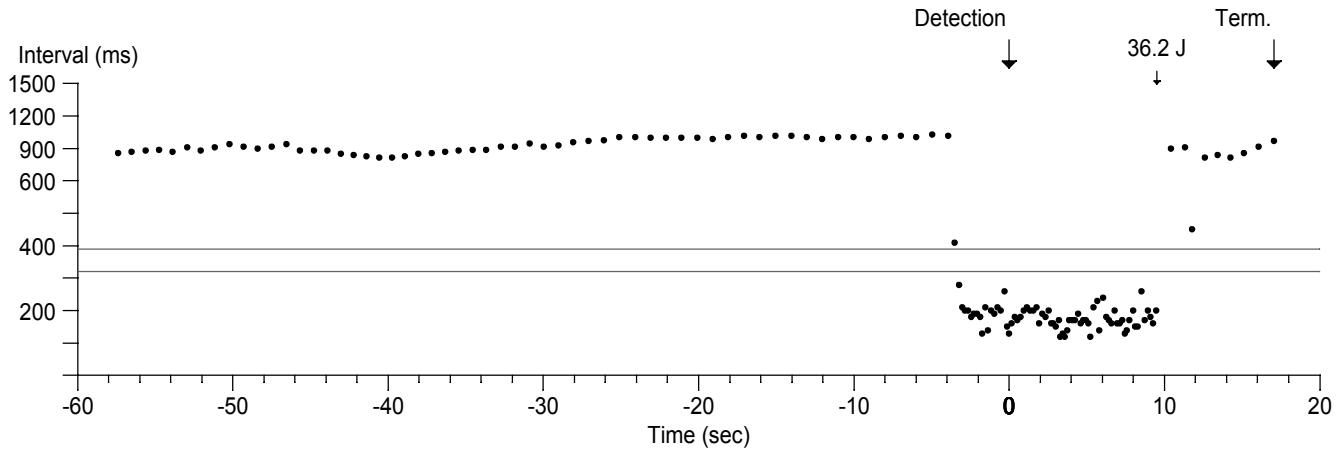





# Treated VT/VF Episode #199

 Device: **Evera S VR DVBC3D1**

Serial Number:

 Date of Visit: **23-Nov-2020 21:14:00**

Patient:

ID:

Physician:

## Episode #199: 06-Nov-2020 05:06:00

### Episode Summary

Initial Type VF (spontaneous)  
 Duration 15 sec  
 V. Max Rate ---  
 V. Median 316 bpm (190 ms)  
 Activity at onset Rest, Sensor = 40 bpm  
 Last Therapy VF Rx1: Defib, Successful

### Initial VT/VF Detection Withheld By

None

| Therapies | Delivered | Charge | Ohms | Energy |
|-----------|-----------|--------|------|--------|
|-----------|-----------|--------|------|--------|

|               |        |          |         |            |
|---------------|--------|----------|---------|------------|
| VF Rx 1 Defib | 36.2 J | 9.06 sec | 49 ohms | 0.0 - 35 J |
|---------------|--------|----------|---------|------------|

Termination

### Wavelet Measurements Prior to Initial VT/VF Detection

Wavelet Result: Wavelet not applied; interval too fast or too slow  
 Template Status: Inconsistent with intrinsic rhythm

- 8. No Match --- Interval too fast
- 7. No Match --- Interval too fast
- 6. No Match --- Interval too fast
- 5. No Match --- Interval too fast
- 4. No Match --- Interval too fast
- 3. No Match --- Interval too fast
- 2. No Match 1 %
- 1. No Match --- Interval too fast
- 0. Detection

| Parameter Settings | Initial | Redetect | V. Interval (Rate) |
|--------------------|---------|----------|--------------------|
|--------------------|---------|----------|--------------------|

|         |         |       |      |                  |
|---------|---------|-------|------|------------------|
| VF      | On      | 18/24 | 9/12 | 320 ms (188 bpm) |
| FVT     | Off     |       |      |                  |
| VT      | On      | 16    | 12   | 390 ms (154 bpm) |
| Monitor | Monitor | 32    |      | 450 ms (133 bpm) |

### Wavelet

Wavelet On, Match = 70 %  
 Template 05-Nov-2020, Auto = On  
 SVT V. Limit 260 ms

### Other Enhancements

Stability Off  
 Onset Off  
 High Rate Timeout  
     VF Zone Only 0.75 min  
     All Zones Off  
 TWave On  
 RV Lead Noise On+Timeout  
 Timeout 0.75 min

| Polarity | RV |
|----------|----|
|----------|----|

|                |         |
|----------------|---------|
| Pace Polarity  | Bipolar |
| Sense Polarity | Bipolar |

| EGM            | Source          | Range     | Sensitivity |
|----------------|-----------------|-----------|-------------|
| EGM1           | RVtip to RVring | +/- 8 mV  | RV 0.3 mV   |
| EGM2 (Wavelet) | Can to RVcoil   | +/- 12 mV |             |



# Treated VT/VF Episode #199

Device: **Evera S VR DVBC3D1**

Serial Number:

Date of Visit: **23-Nov-2020 21:14:00**

Patient:

ID:

Physician:

| Type | ATP Seq | Shocks | Success | ID# | Date        | Time<br>hh:mm | Duration<br>hh:mm:ss | Avg bpm<br>V | Max bpm<br>V | Activity at<br>Onset |
|------|---------|--------|---------|-----|-------------|---------------|----------------------|--------------|--------------|----------------------|
| VF   | 0       | 35J    | Yes     | 199 | 06-Nov-2020 | 05:06         | :15                  | 333          | ---          | Rest                 |

No Match ---                      No Match ---                      No Match ---                      No Match ---



6 mV  
20 ms  
— QRS  
- - - - Template

No Match ---                      No Match ---                      No Match 1 %                      No Match ---

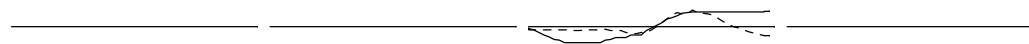

# Treated VT/VF Episode #197

Device: **Evera S VR DVBC3D1**

Serial Number:

Date of Visit: **23-Nov-2020 21:14:00**

Patient:

ID:

Physician:

| Type | ATP Seq | Shocks | Success | ID# | Date        | Time<br>hh:mm | Duration<br>hh:mm:ss | Avg bpm<br>V | Max bpm<br>V | Activity at<br>Onset |
|------|---------|--------|---------|-----|-------------|---------------|----------------------|--------------|--------------|----------------------|
| VF   | 0       | 35J    | Yes     | 197 | 01-Nov-2020 | 04:57         | :14                  | 316          | ---          | Rest                 |

• V-V      VF = 320 ms      VT = 390 ms

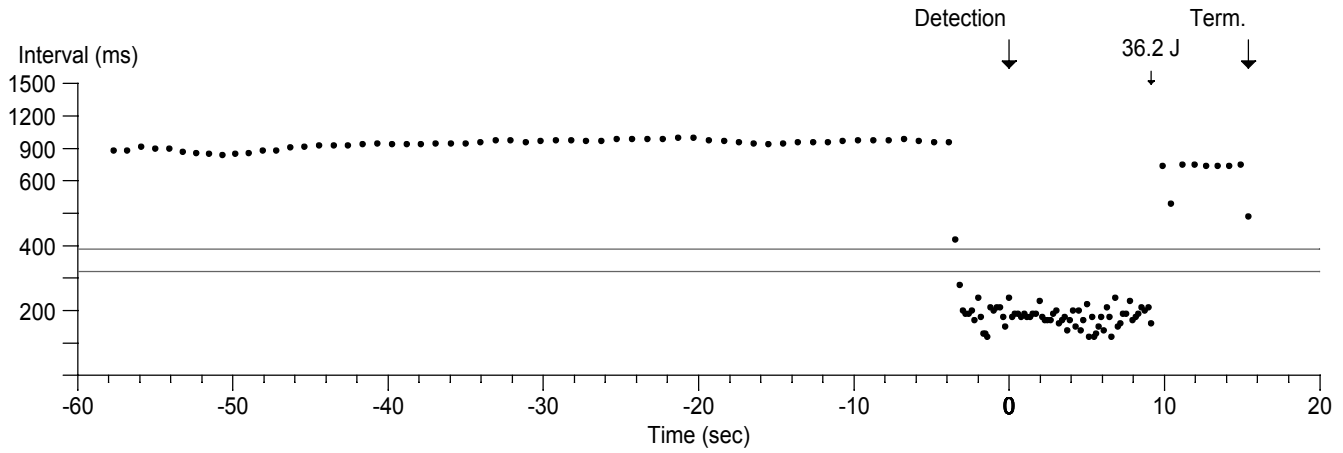





# Treated VT/VF Episode #197

 Device: **Evera S VR DVBC3D1**

Serial Number:

 Date of Visit: **23-Nov-2020 21:14:00**

Patient:

ID:

Physician:

## Episode #197: 01-Nov-2020 04:57:48

### Episode Summary

Initial Type VF (spontaneous)  
 Duration 14 sec  
 V. Max Rate ---  
 V. Median 300 bpm (200 ms)  
 Activity at onset Rest, Sensor = 40 bpm  
 Last Therapy VF Rx1: Defib, Successful

### Initial VT/VF Detection Withheld By

None

| Therapies     | Delivered | Charge   | Ohms    | Energy     |
|---------------|-----------|----------|---------|------------|
| VF Rx 1 Defib | 36.2 J    | 8.88 sec | 49 ohms | 0.0 - 35 J |

Termination

### Wavelet Measurements Prior to Initial VT/VF Detection

Wavelet Result: Wavelet not applied; interval too fast or too slow  
 Template Status: OK

- 8. No Match --- Interval too fast
- 7. No Match --- Interval too fast
- 6. No Match --- Interval too fast
- 5. No Match --- Interval too fast
- 4. No Match --- Interval too fast
- 3. No Match --- Interval too fast
- 2. No Match --- Interval too fast
- 1. No Match --- Interval too fast
- 0. Detection

| Parameter Settings | Initial | Redetect | V. Interval (Rate) |
|--------------------|---------|----------|--------------------|
| VF On              | 18/24   | 9/12     | 320 ms (188 bpm)   |
| FVT Off            |         |          |                    |
| VT On              | 16      | 12       | 390 ms (154 bpm)   |
| Monitor Monitor    | 32      |          | 450 ms (133 bpm)   |

### Wavelet

Wavelet On, Match = 70 %  
 Template 31-Oct-2020, Auto = On  
 SVT V. Limit 260 ms

### Other Enhancements

Stability Off  
 Onset Off  
 High Rate Timeout  
     VF Zone Only 0.75 min  
     All Zones Off  
 TWave On  
 RV Lead Noise On+Timeout  
 Timeout 0.75 min

### Polarity

### RV

Pace Polarity Bipolar  
 Sense Polarity Bipolar

| EGM            | Source          | Range     | Sensitivity |
|----------------|-----------------|-----------|-------------|
| EGM1           | RVtip to RVring | +/- 8 mV  | RV 0.3 mV   |
| EGM2 (Wavelet) | Can to RVcoil   | +/- 12 mV |             |

# Treated VT/VF Episode #197

Device: **Evera S VR DVBC3D1**

Serial Number:

Date of Visit: **23-Nov-2020 21:14:00**

Patient:

ID:

Physician:

| Type | ATP Seq | Shocks | Success | ID# | Date        | Time<br>hh:mm | Duration<br>hh:mm:ss | Avg bpm<br>V | Max bpm<br>V | Activity at<br>Onset |
|------|---------|--------|---------|-----|-------------|---------------|----------------------|--------------|--------------|----------------------|
| VF   | 0       | 35J    | Yes     | 197 | 01-Nov-2020 | 04:57         | :14                  | 316          | ---          | Rest                 |

No Match ---                      No Match ---                      No Match ---                      No Match ---



6 mV  
 20 ms  
 — QRS  
 - - - - Template

No Match ---                      No Match ---                      No Match ---                      No Match ---



# Treated VT/VF Episode #196

Device: **Evera S VR DVBC3D1**

Serial Number:

Date of Visit: **23-Nov-2020 21:14:00**

Patient:

ID:

Physician:

| Type | ATP Seq | Shocks | Success | ID# | Date        | Time<br>hh:mm | Duration<br>hh:mm:ss | Avg bpm<br>V | Max bpm<br>V | Activity at<br>Onset |
|------|---------|--------|---------|-----|-------------|---------------|----------------------|--------------|--------------|----------------------|
| VF   | 0       | 35J    | Yes     | 196 | 29-Oct-2020 | 06:50         | :14                  | 333          | 333          | Rest                 |

• V-V      VF = 320 ms      VT = 390 ms

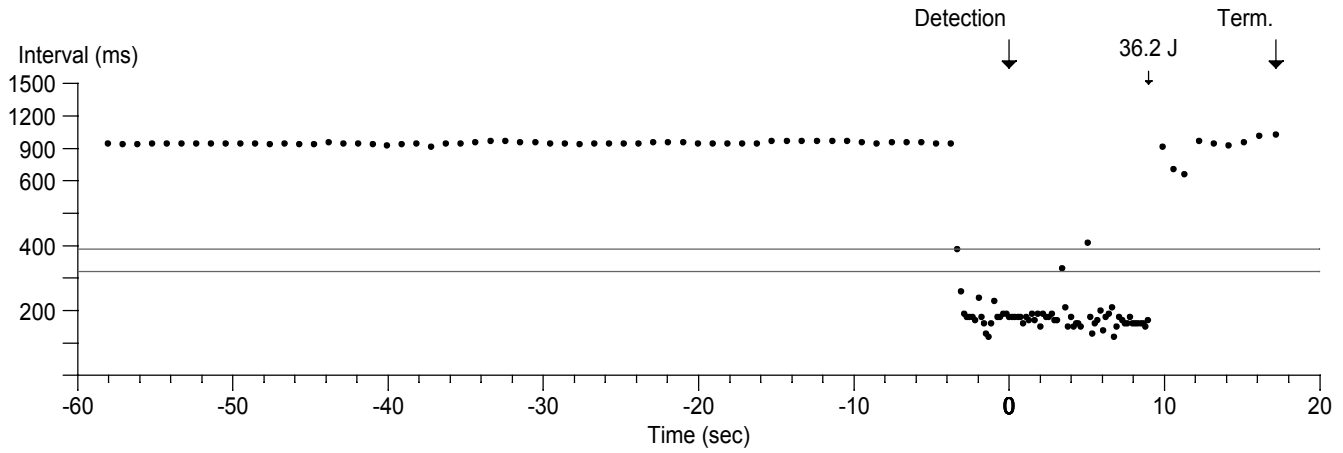







# Treated VT/VF Episode #196

Device: **Evera S VR DVBC3D1**

Serial Number:

Date of Visit: **23-Nov-2020 21:14:00**

Patient:

ID:

Physician:

## Episode #196: 29-Oct-2020 06:50:21

### Episode Summary

Initial Type VF (spontaneous)  
 Duration 14 sec  
 V. Max Rate 333 bpm  
 V. Median 333 bpm (180 ms)  
 Activity at onset Rest, Sensor = 40 bpm  
 Last Therapy VF Rx1: Defib, Successful

### Initial VT/VF Detection Withheld By

None

| Therapies     | Delivered | Charge   | Ohms    | Energy     |
|---------------|-----------|----------|---------|------------|
| VF Rx 1 Defib | 36.2 J    | 8.58 sec | 45 ohms | 0.0 - 35 J |

Termination

### Wavelet Measurements Prior to Initial VT/VF Detection

Wavelet Result: Wavelet not applied; interval too fast or too slow  
 Template Status: OK

- 8. No Match --- Interval too fast
- 7. No Match --- Interval too fast
- 6. No Match --- Interval too fast
- 5. No Match --- Interval too fast
- 4. No Match --- Interval too fast
- 3. No Match --- Interval too fast
- 2. No Match --- Interval too fast
- 1. No Match --- Interval too fast
- 0. Detection

| Parameter | Settings | Initial | Redetect | V. Interval (Rate) |
|-----------|----------|---------|----------|--------------------|
| VF        | On       | 18/24   | 9/12     | 320 ms (188 bpm)   |
| FVT       | Off      |         |          |                    |
| VT        | On       | 16      | 12       | 390 ms (154 bpm)   |
| Monitor   | Monitor  | 32      |          | 450 ms (133 bpm)   |

### Wavelet

Wavelet On, Match = 70 %  
 Template 28-Oct-2020, Auto = On  
 SVT V. Limit 260 ms

### Other Enhancements

Stability Off  
 Onset Off  
 High Rate Timeout  
     VF Zone Only 0.75 min  
     All Zones Off  
 TWave On  
 RV Lead Noise On+Timeout  
 Timeout 0.75 min

### Polarity

#### RV

Pace Polarity Bipolar  
 Sense Polarity Bipolar

| EGM            | Source          | Range     | Sensitivity |
|----------------|-----------------|-----------|-------------|
| EGM1           | RVtip to RVring | +/- 8 mV  | RV 0.3 mV   |
| EGM2 (Wavelet) | Can to RVcoil   | +/- 12 mV |             |

# Treated VT/VF Episode #196

Device: **Evera S VR DVBC3D1**

Serial Number:

Date of Visit: **23-Nov-2020 21:14:00**

Patient:

ID:

Physician:

| Type | ATP Seq | Shocks | Success | ID# | Date        | Time<br>hh:mm | Duration<br>hh:mm:ss | Avg bpm<br>V | Max bpm<br>V | Activity at<br>Onset |
|------|---------|--------|---------|-----|-------------|---------------|----------------------|--------------|--------------|----------------------|
| VF   | 0       | 35J    | Yes     | 196 | 29-Oct-2020 | 06:50         | :14                  | 333          | 333          | Rest                 |

No Match ---

No Match ---

No Match ---

No Match ---

6 mV

┌  
└ 20 ms  
— QRS  
- - - - Template

No Match ---

No Match ---

No Match ---

No Match ---

# Treated VT/VF Episode #195

Device: **Evera S VR DVBC3D1**

Serial Number:

Date of Visit: **23-Nov-2020 21:14:00**

Patient:

ID:

Physician:

| Type | ATP Seq | Shocks | Success | ID# | Date        | Time<br>hh:mm | Duration<br>hh:mm:ss | Avg bpm<br>V | Max bpm<br>V | Activity at<br>Onset |
|------|---------|--------|---------|-----|-------------|---------------|----------------------|--------------|--------------|----------------------|
| VF   | 0       | 35J    | Yes     | 195 | 29-Oct-2020 | 05:56         | :14                  | 333          | ---          | Rest                 |

• V-V      VF = 320 ms      VT = 390 ms

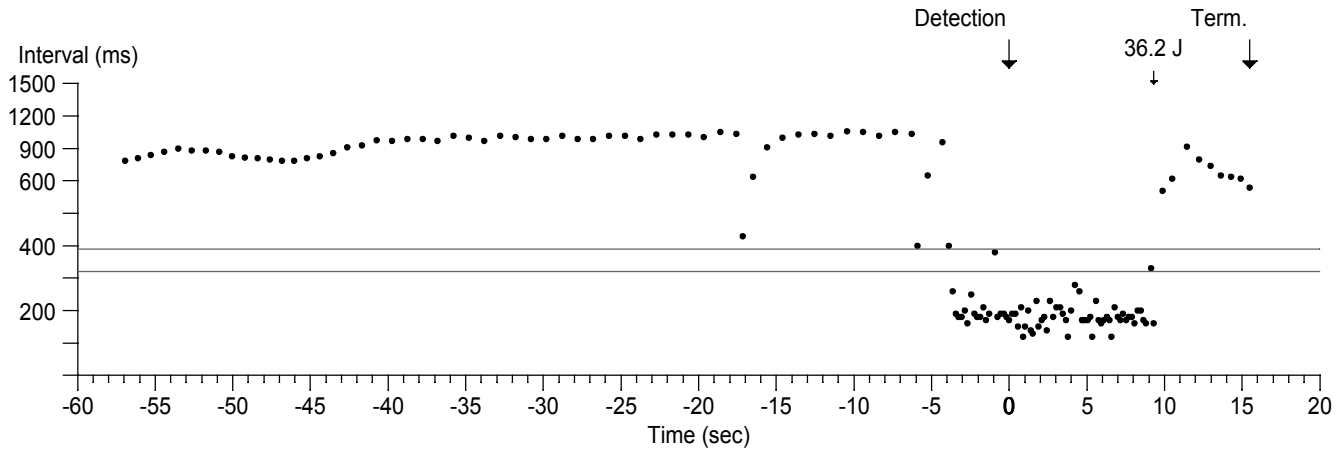

Supplement: mmc5.pdf [file mmc5.pdf]
