# Supplementary material for: Patient-specific iPSC-derived cardiomyocytes reveal variable phenotypic severity of Brugada syndrome
Source: PubMed Central journal article supplement — eBioMedicine. 2023 Aug 4;95:104741. doi: 10.1016/j.ebiom.2023.104741 (PMC10427992; doi:10.1016/j.ebiom.2023.104741), 2023-08-04
Supplement: mmc2.pdf [file mmc2.pdf]

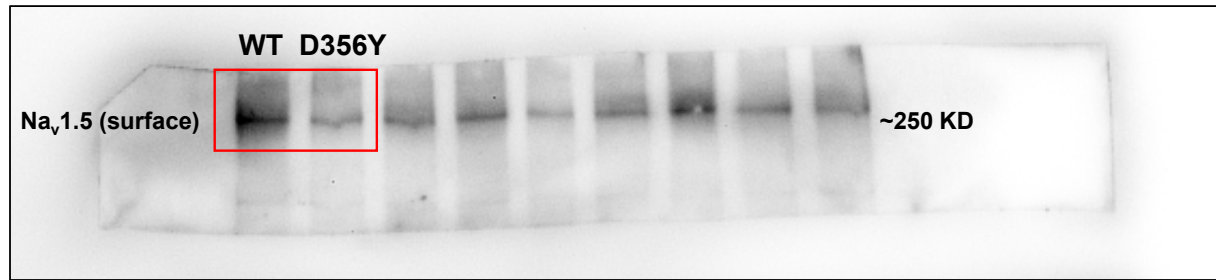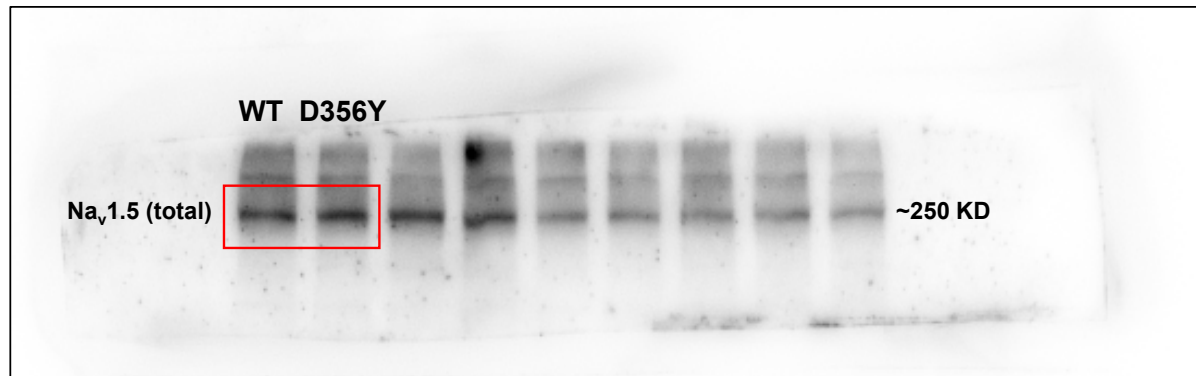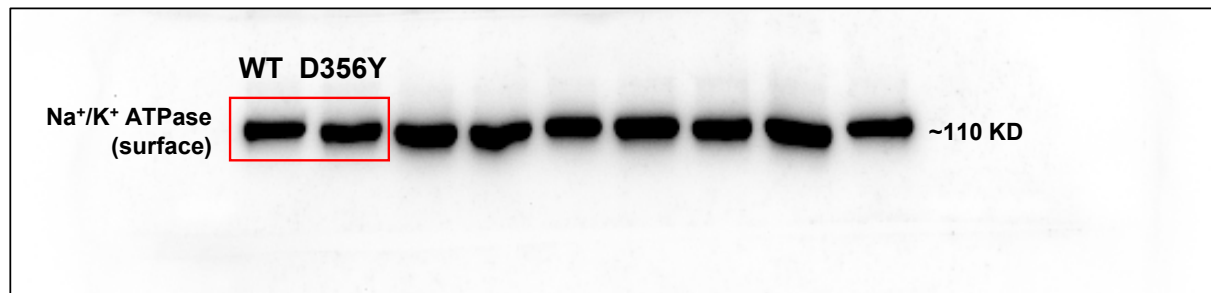

Full length blots of total and surface expression of WT and D356Y Na<sub>v</sub>1.5 transiently transfected in HEK293 cells. Red boxes indicate the cropped blots shown in Figure 3i.

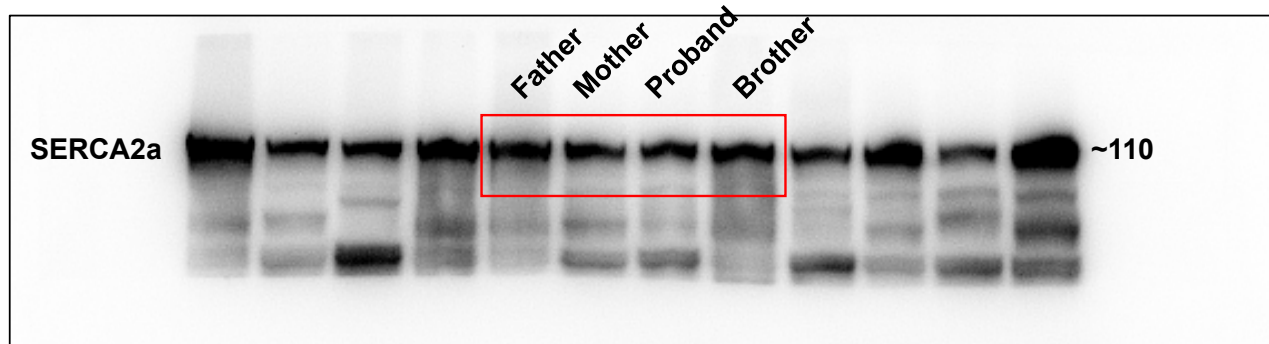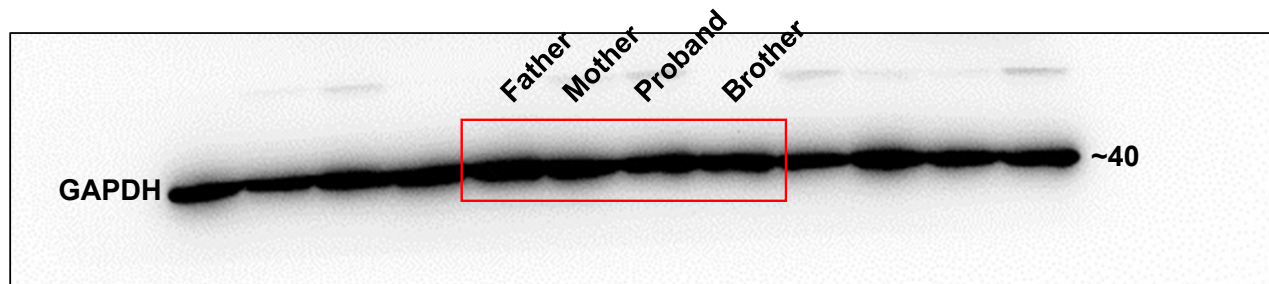

**Full length blots of SERCA2a expression in father, mother, proband and brother iPSC-CMs. Red boxes indicate the cropped blots shown in Supplementary Figure 16a.**

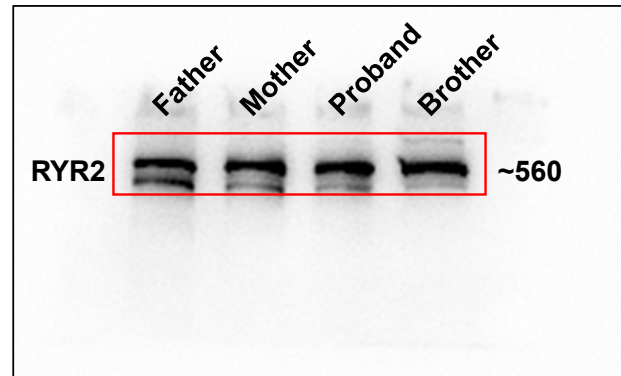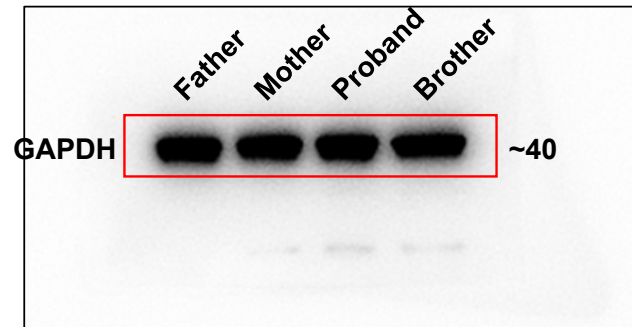

**Full length blots of RYR2 expression in father, mother, proband and brother iPSC-CMs. Red boxes indicate the cropped blots shown in Supplementary Figure 16a.**

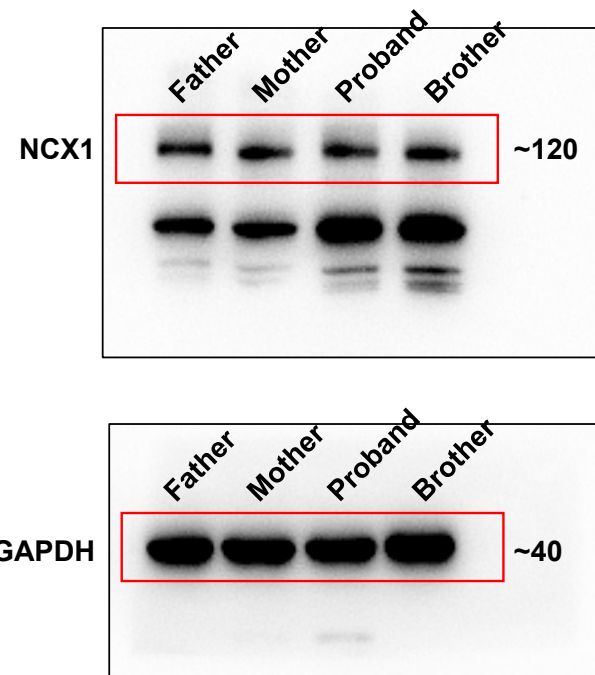

**Full length blots of NCX1 expression in father, mother, proband and brother iPSC-CMs. Red boxes indicate the cropped blots shown in Supplementary Figure 16a.**

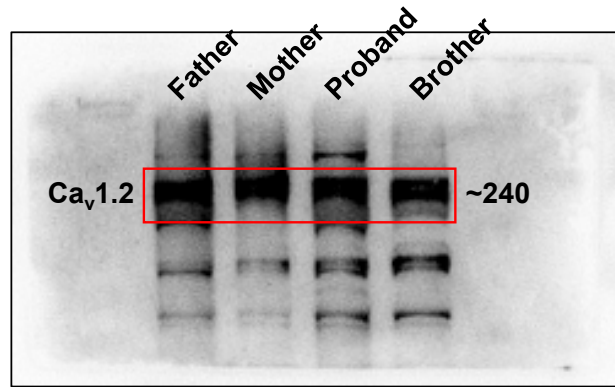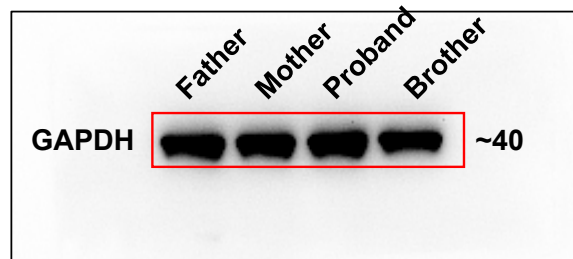

**Full length blots of  $Ca_v1.2$  expression in father, mother, proband and brother iPSC-CMs. Red boxes indicate the cropped blots shown in Supplementary Figure 16a.**

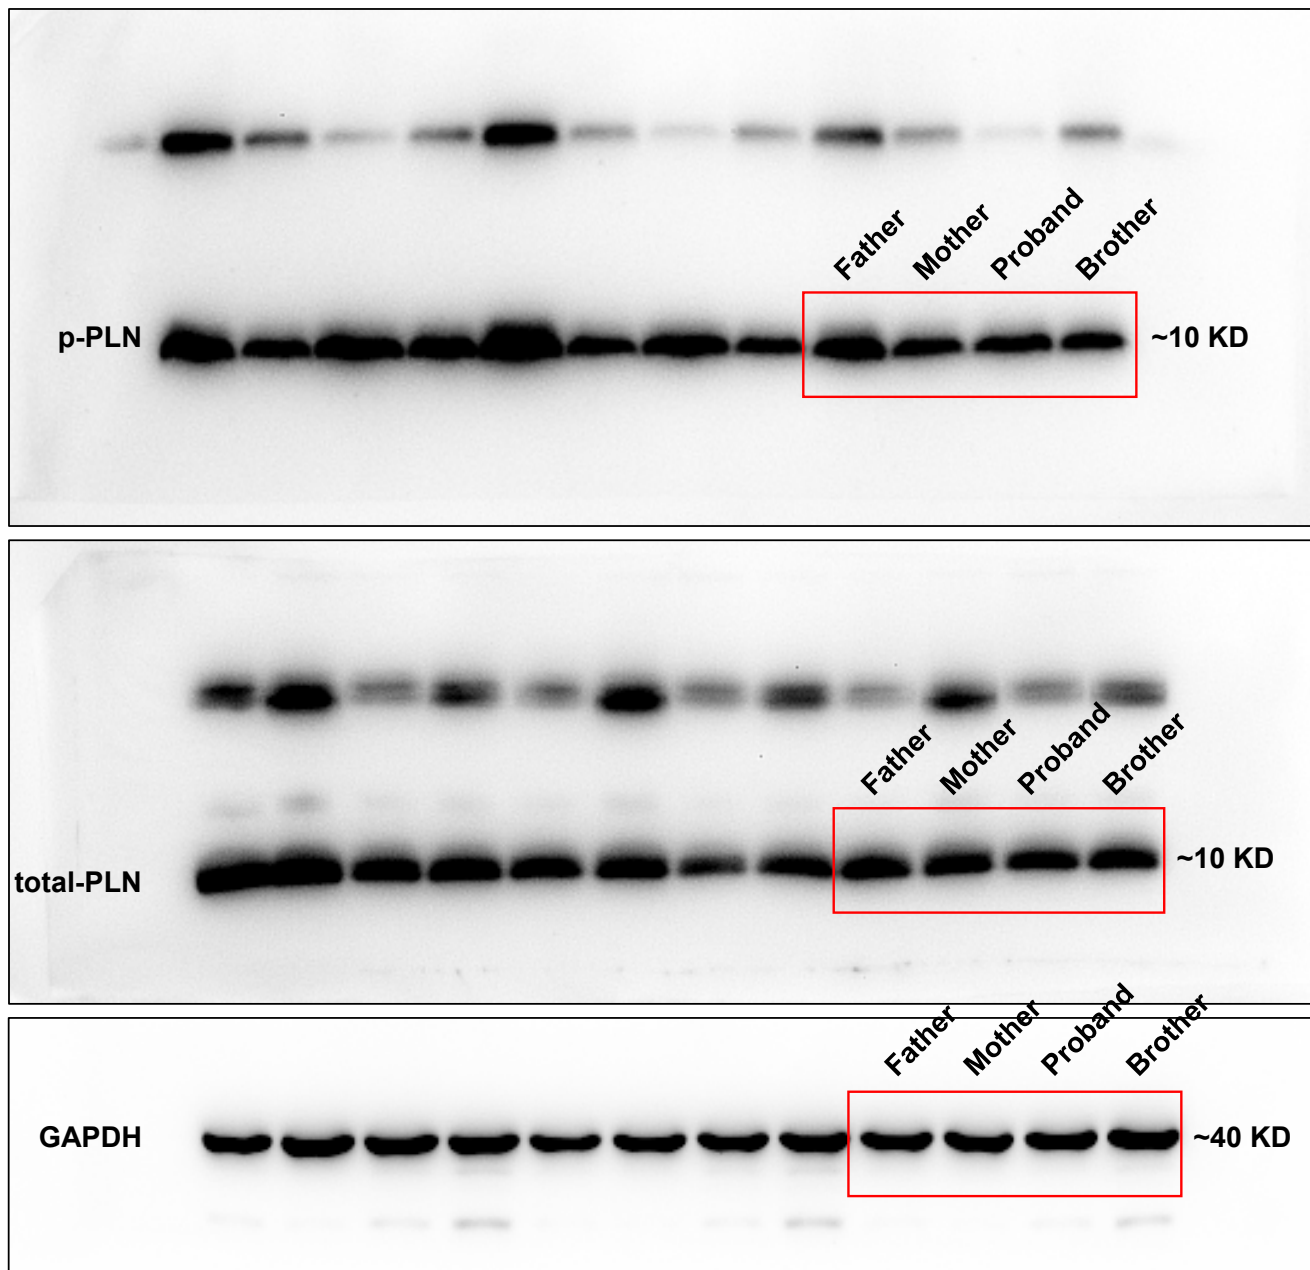

**Full length blots of PLN expression in father, mother, proband and brother iPSC-CMs. Red boxes indicate the cropped blots shown in Supplementary Figure 16a.**

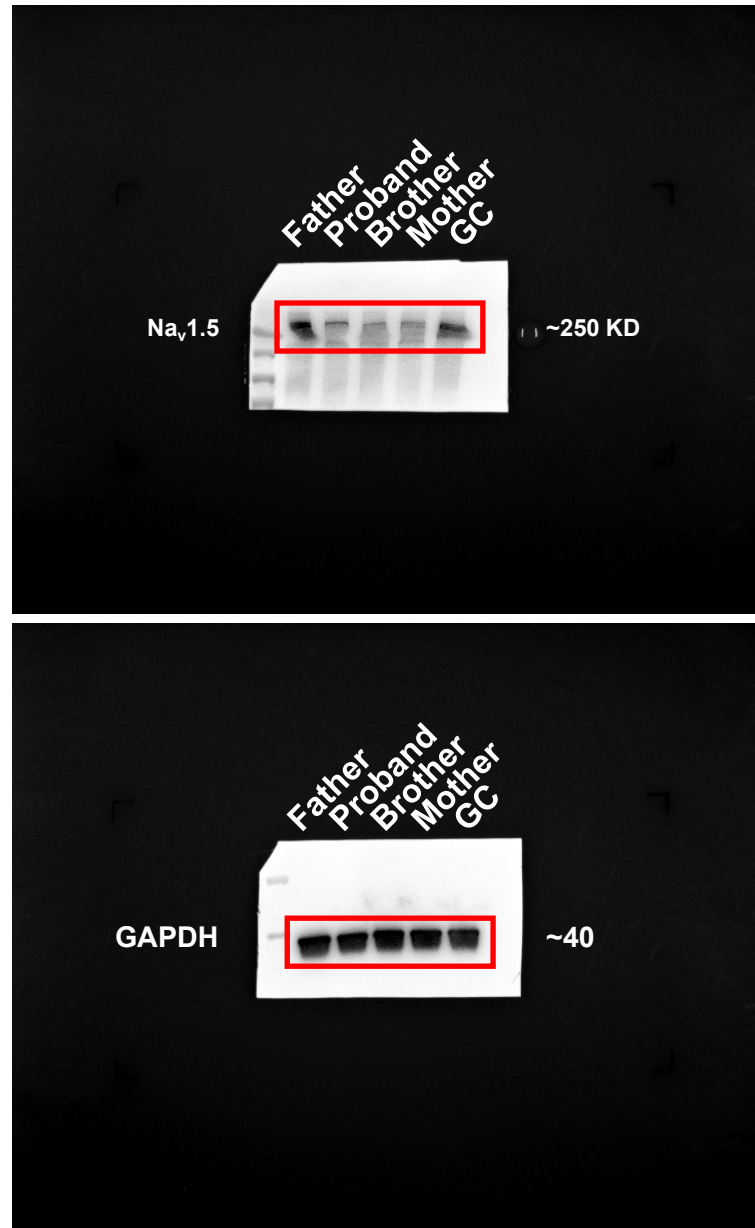

**Full length blots of Na<sub>v</sub>1.5 expression in father, proband, brother, mother and GC iPSC-CMs. Red boxes indicate the cropped blots shown in Supplementary Figure 19a.**
