# Supplementary material for: Patient-specific iPSC-derived cardiomyocytes reveal variable phenotypic severity of Brugada syndrome
Source: PubMed Central journal article supplement — eBioMedicine. 2023 Aug 4;95:104741. doi: 10.1016/j.ebiom.2023.104741 (PMC10427992; doi:10.1016/j.ebiom.2023.104741), 2023-08-04
Supplement: mmc3.pdf [file mmc3.pdf]

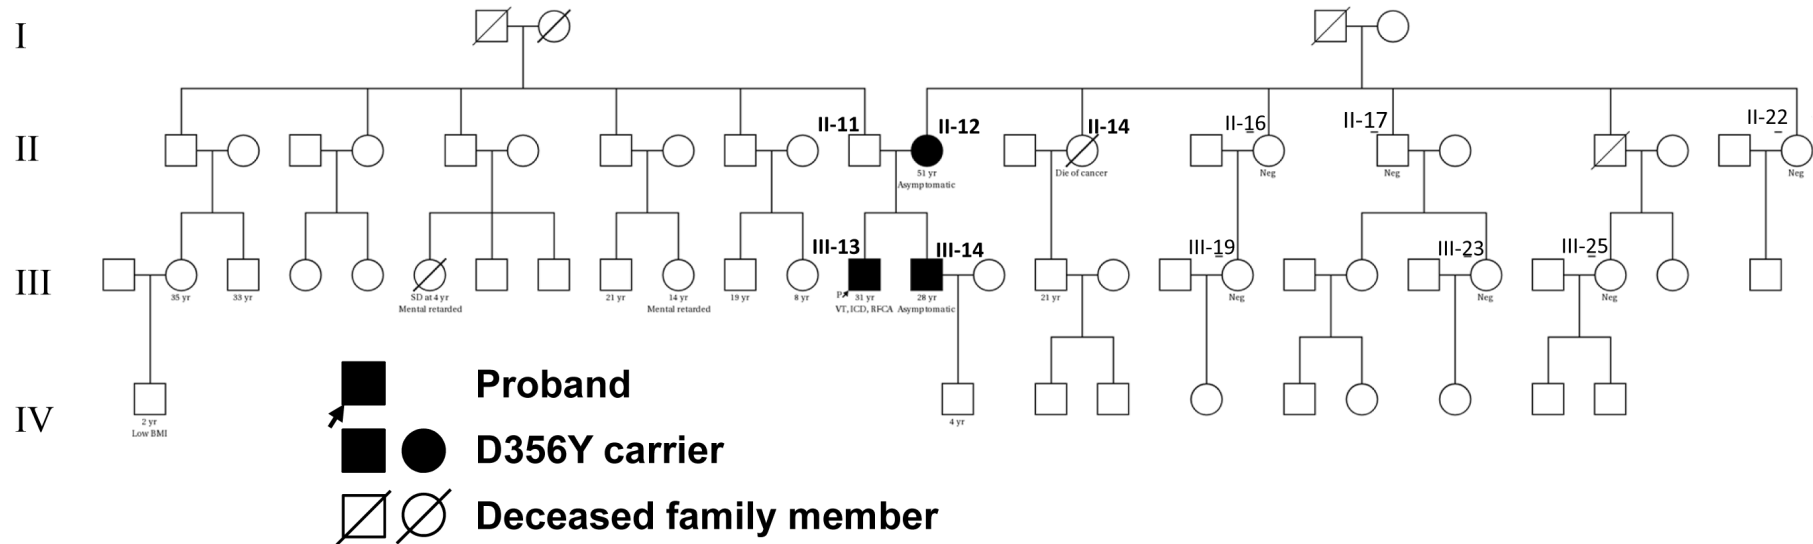

**Supplementary Figure 1. The detailed pedigree of the Brugada syndrome family cohort.** The mother of the proband (II-12) was a *SCN5A* D356Y mutation carrier. She was asymptomatic. II-14 died of lung cancer. III-6 and III-10 were mental retarded and the former died suddenly at 4 years old. The marker “Neg” means the negative of the *SCN5A* D356Y mutation. BMI: Body mass index. SD: Sudden death. VT: Ventricular tachycardia. ICD: Implantable cardiac defibrillator. RFCA: Radiofrequency catheter ablation.

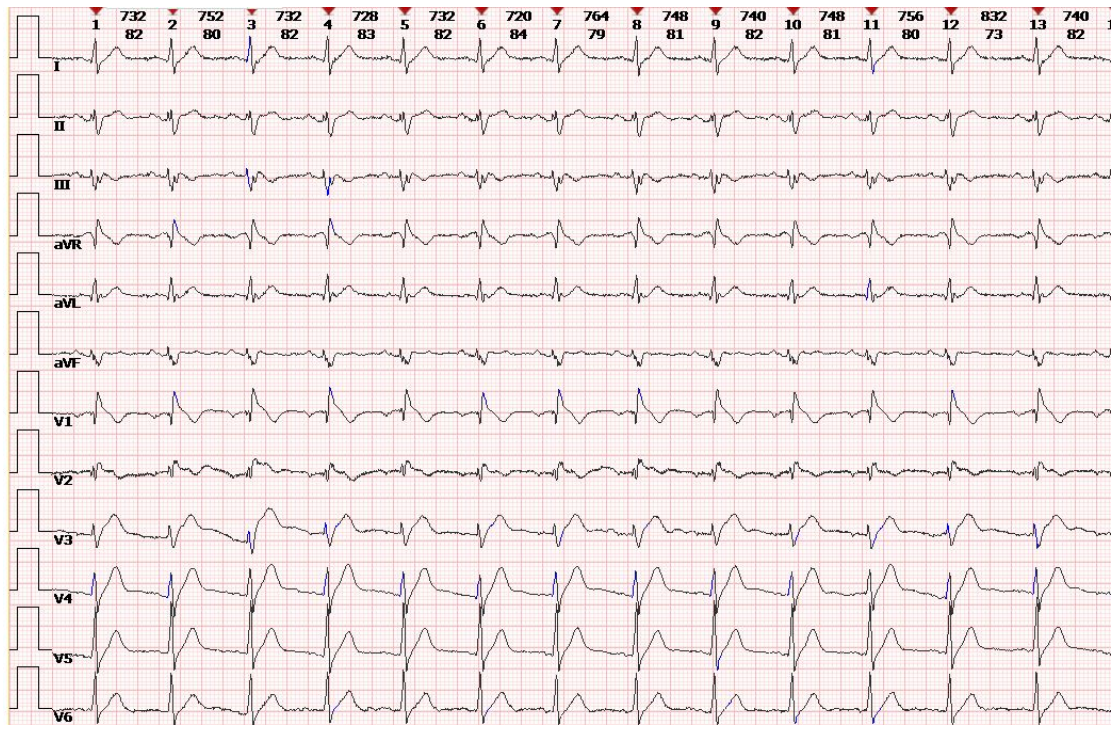

**Supplementary Figure 2. The full tracing of the second ICS ECG of the proband.**

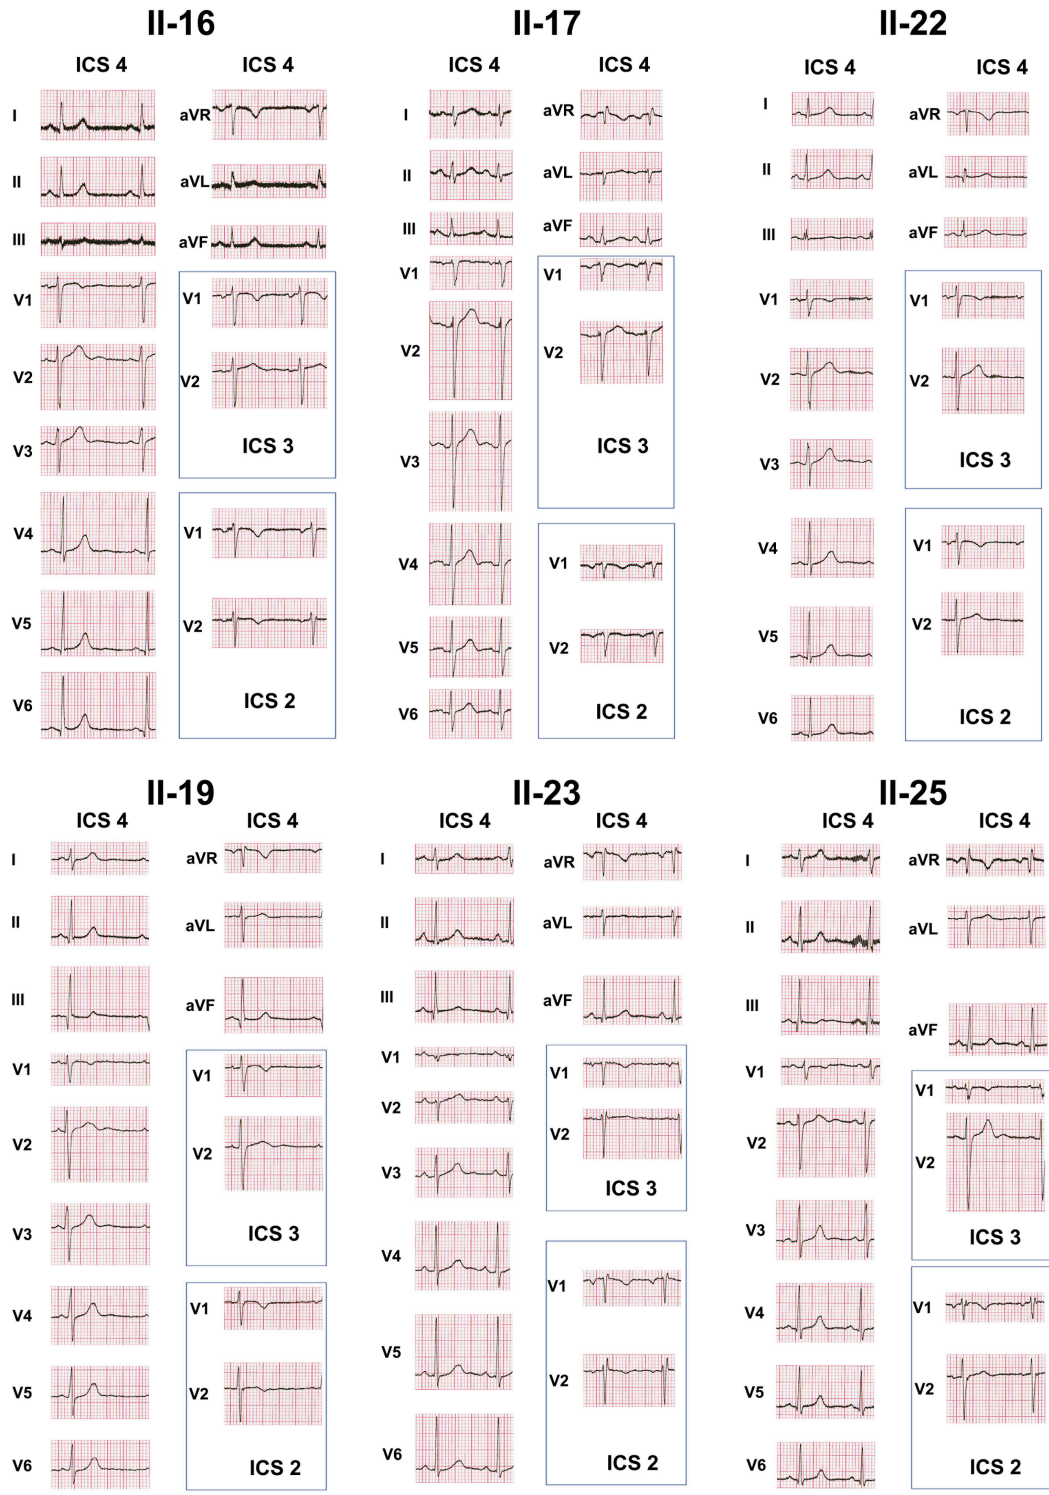

**Supplementary Figure 3. The representative ECGs from six healthy control subjects in the BrS family.** The representative ECGs from six healthy control subjects, including II-16, II-17, II-22, III-19, III-23 and III-25.

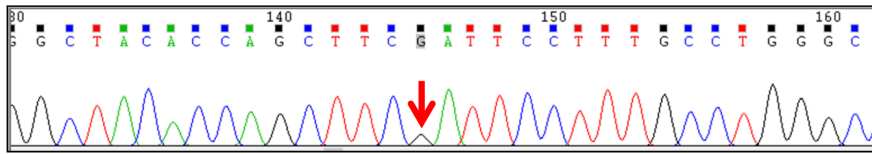

**II-16**  
**c.1066G**

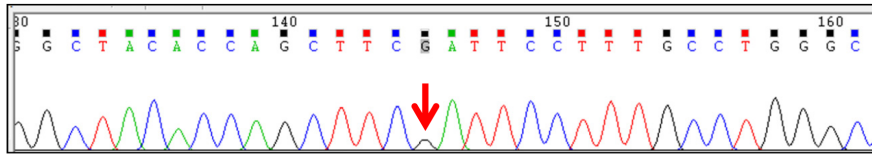

**II-17**  
**c.1066G**

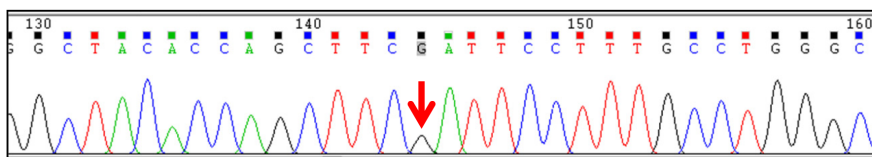

**II-22**  
**c.1066G**

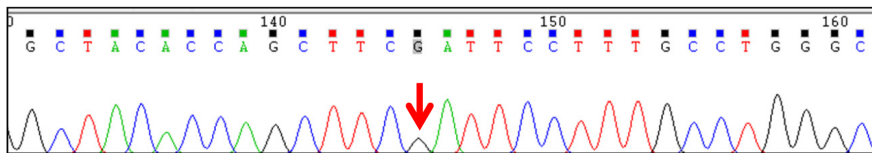

**III-19**  
**c.1066G**

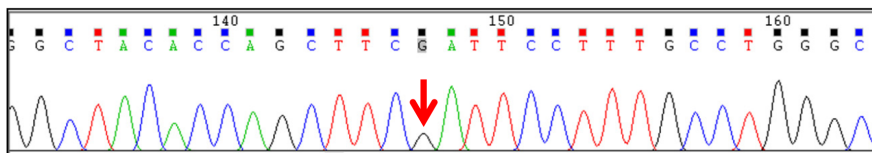

**III-23**  
**c.1066G**

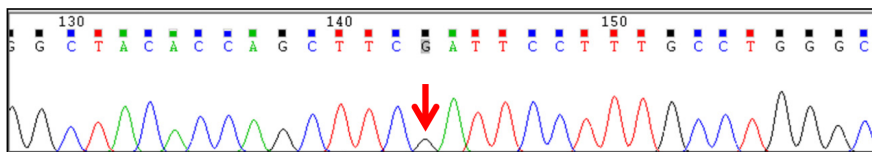

**III-25**  
**c.1066G**

**Supplementary Figure 4. Sanger verification of the absence of *SCN5A* D356Y in the six healthy control subjects of the pedigree.** Sanger verification of the absence of *SCN5A* D356Y in the six healthy control subjects of the pedigree, including II-16, II-17, II-22, III-19, III-23 and III-25.

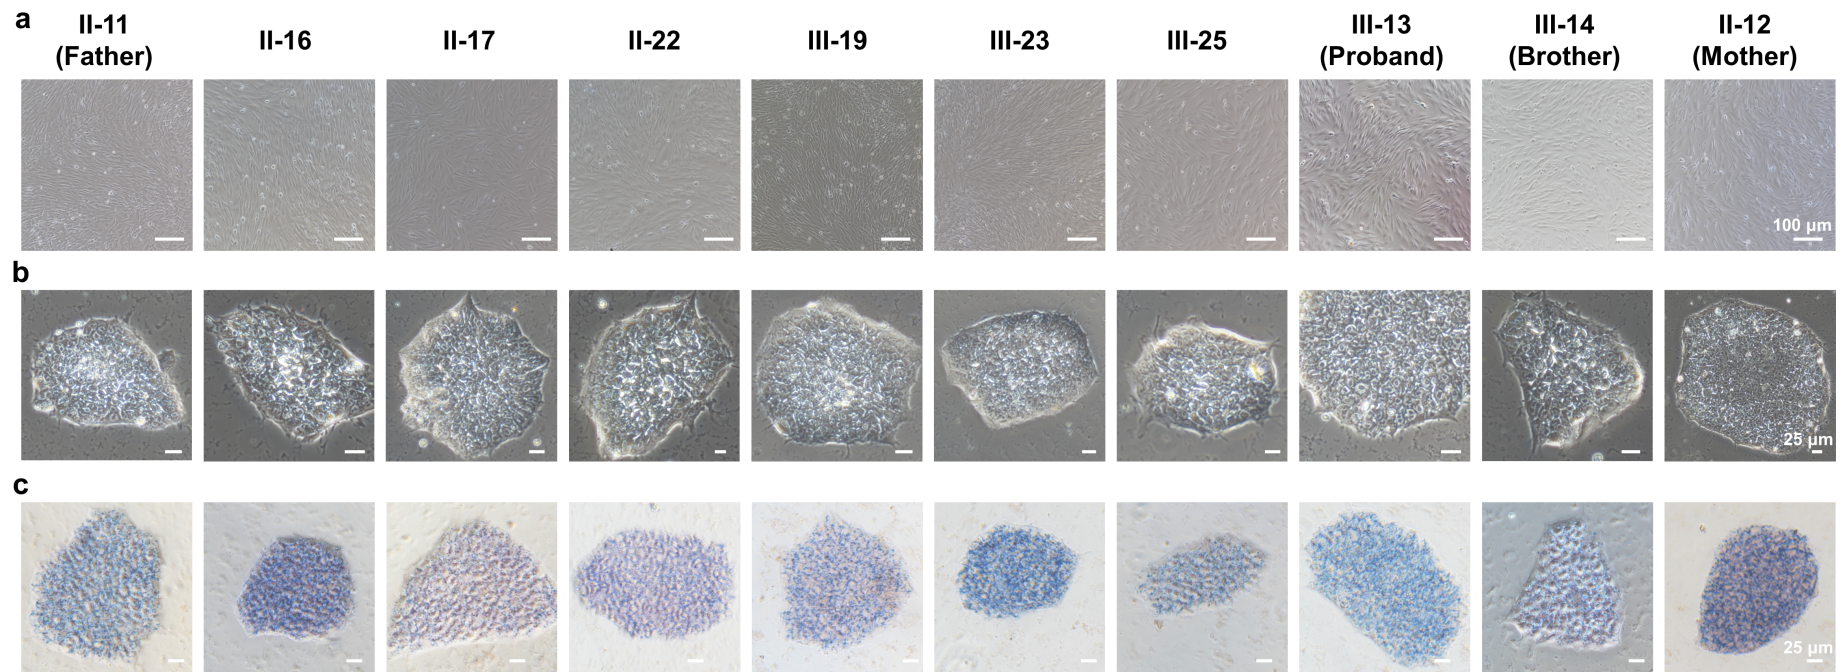

**Supplementary Figure 5. Generation and characterization of iPSCs from different individuals in the BrS family cohort. a.** Typical morphology of skin fibroblasts derived from healthy control subjects and BrS patients in the same family. Scale bar, 100  $\mu\text{m}$ . **b.** Typical morphology of iPSC colonies derived from healthy control subjects and BrS patients. Scale bar, 25  $\mu\text{m}$ . **c.** Alkaline Phosphatase (ALP) staining of control and BrS iPSCs. Scale bar, 25  $\mu\text{m}$ .

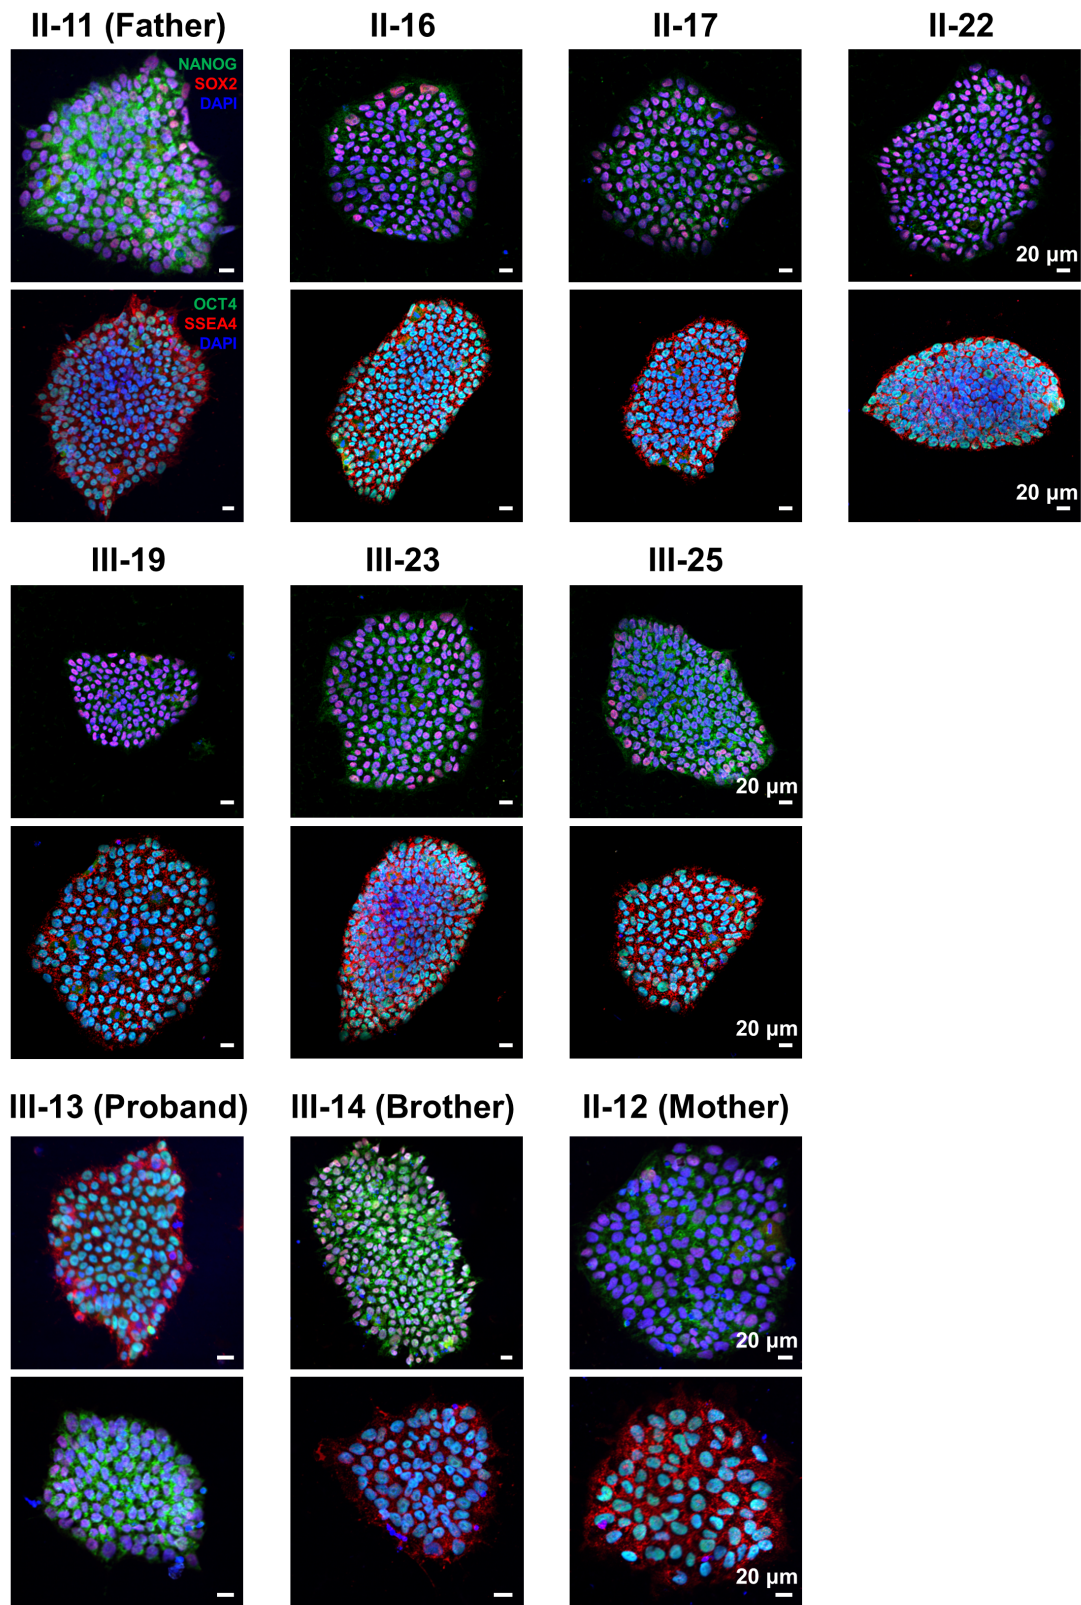

**Supplementary Figure 6. Pluripotent staining of generated iPSCs.** Pluripotent staining of control and BrS iPSCs using NANOG (green), SOX2 (red), OCT4 (green) and SSEA4 (red). DAPI indicates nuclear staining (blue). Scale bar, 20  $\mu$ m.

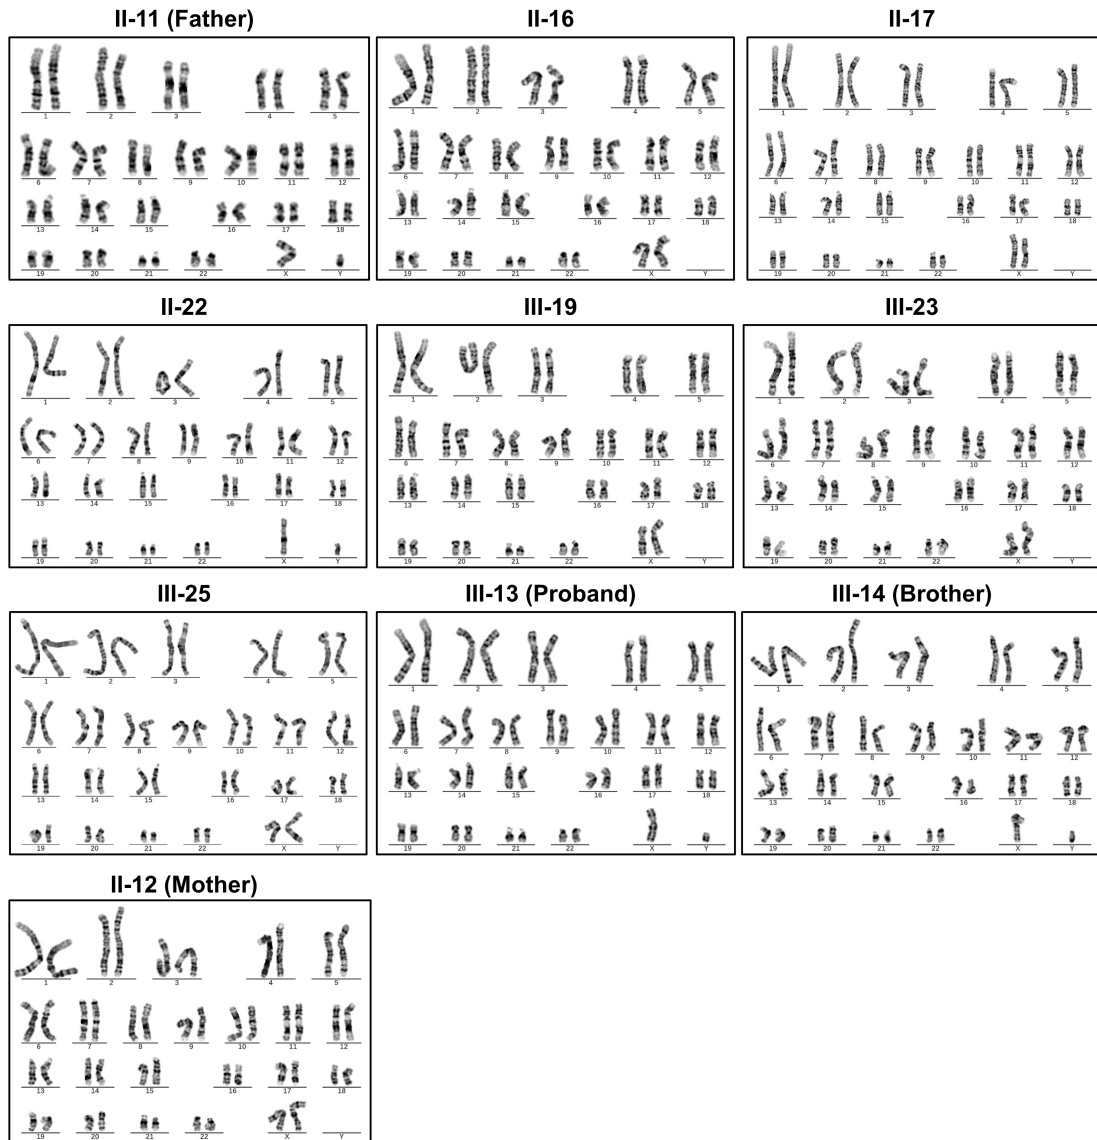

**Supplementary Figure 7. Karyotype analysis of generated iPSCs.** Representative graphs of karyotype of different generated iPSCs.

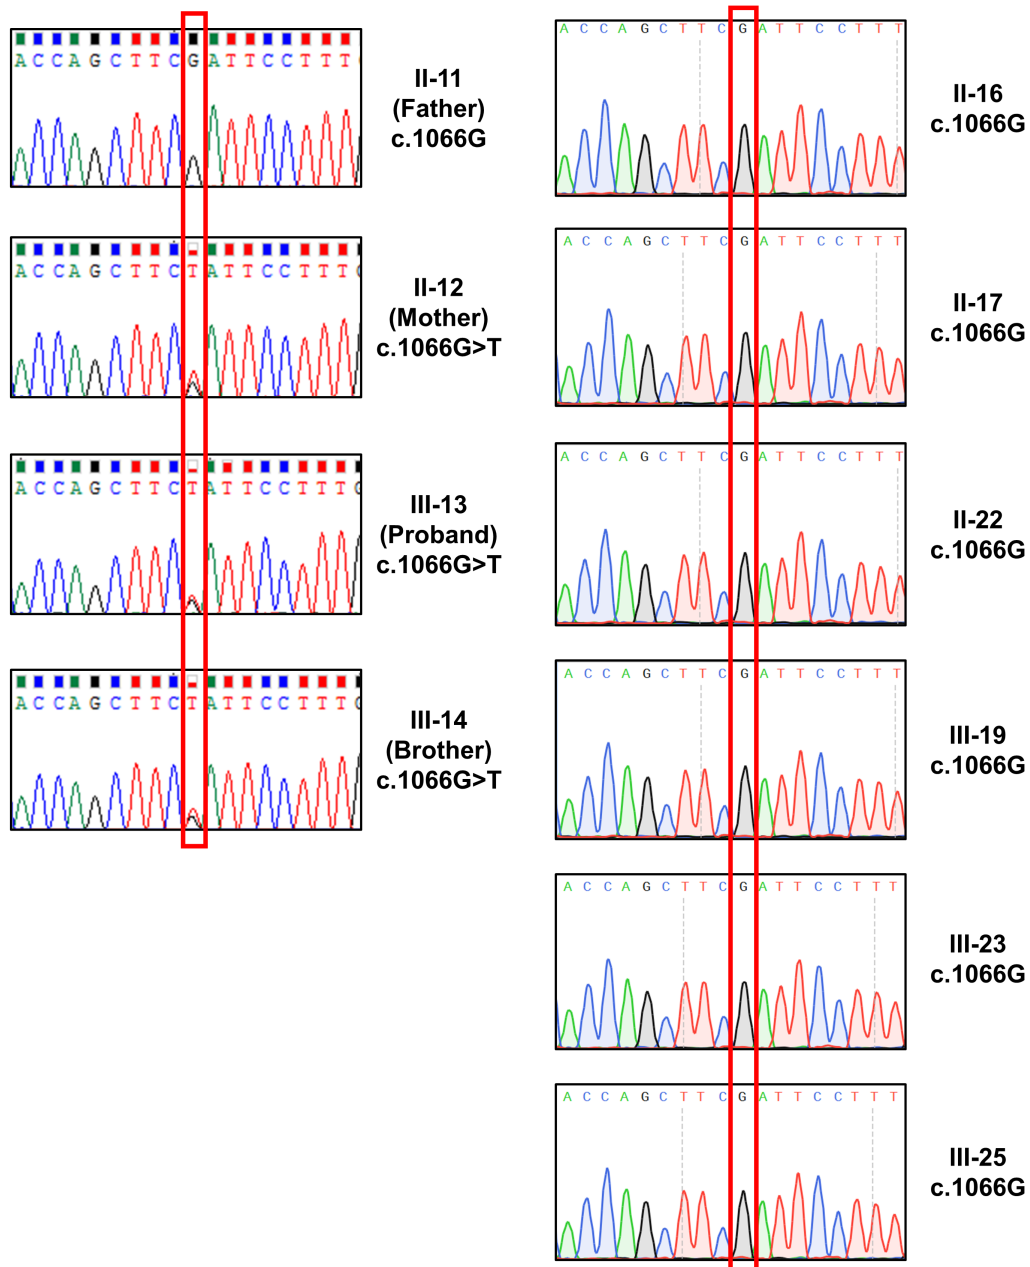

**Supplementary Figure 8. Genetic screening of *SCN5A* D356Y in iPSCs from different individuals in the BrS family cohort.** Confirmation of the existence of *SCN5A* D356Y variant in proband, proband's brother and mother, but not in proband's father and other healthy control family members at the iPSC level.



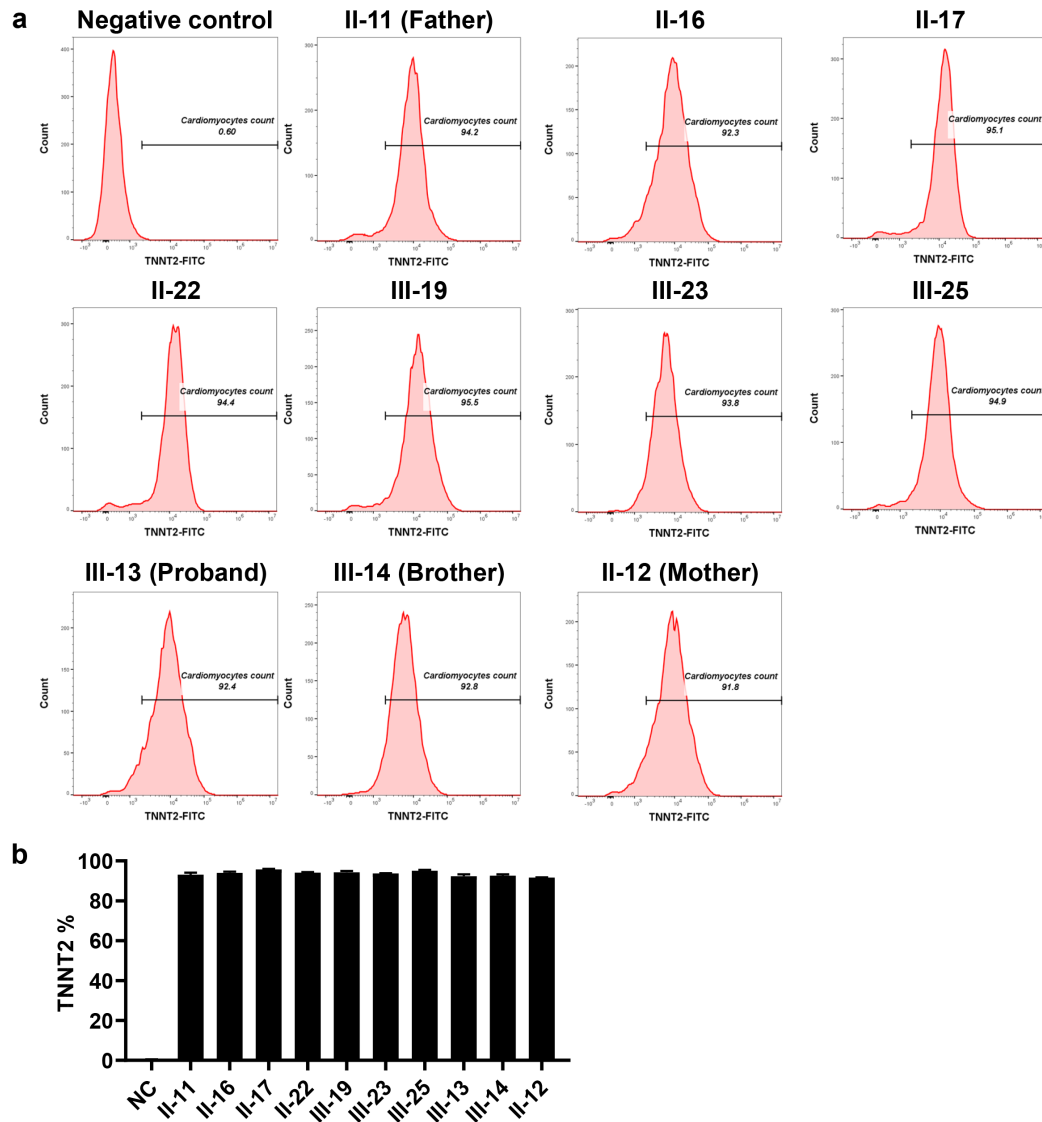

**Supplementary Figure 9. Efficient cardiac differentiation of the generated iPSC lines.** **a.** Fluorescence-activated cell sorting (FACS) analysis of TNNT2-positive cells in cardiomyocytes derived from different iPSC lines. **b.** Bar graph to compare the percentage of TNNT2-positive cells between different iPSC-CMs. n= 3.

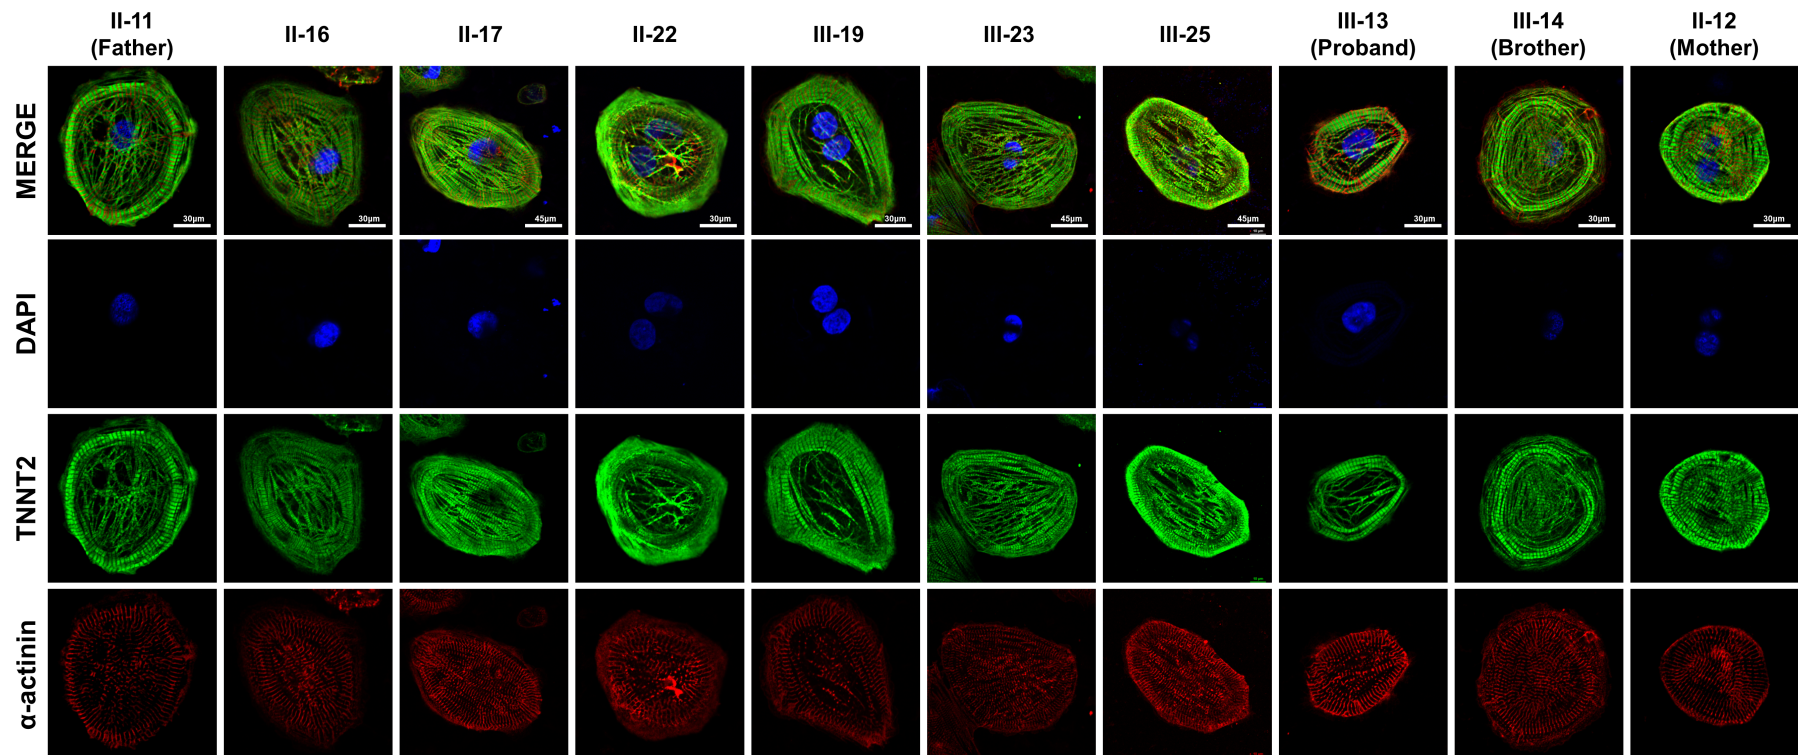

**Supplementary Figure 10. Generation and characterization of iPSC-CMs from different individuals in the BrS family cohort.** Representative graphs of cardiac-specific staining by TNNT2 (green) and  $\alpha$ -actinin (red) in different iPSC-CMs. Scale bar, 5  $\mu$ m.

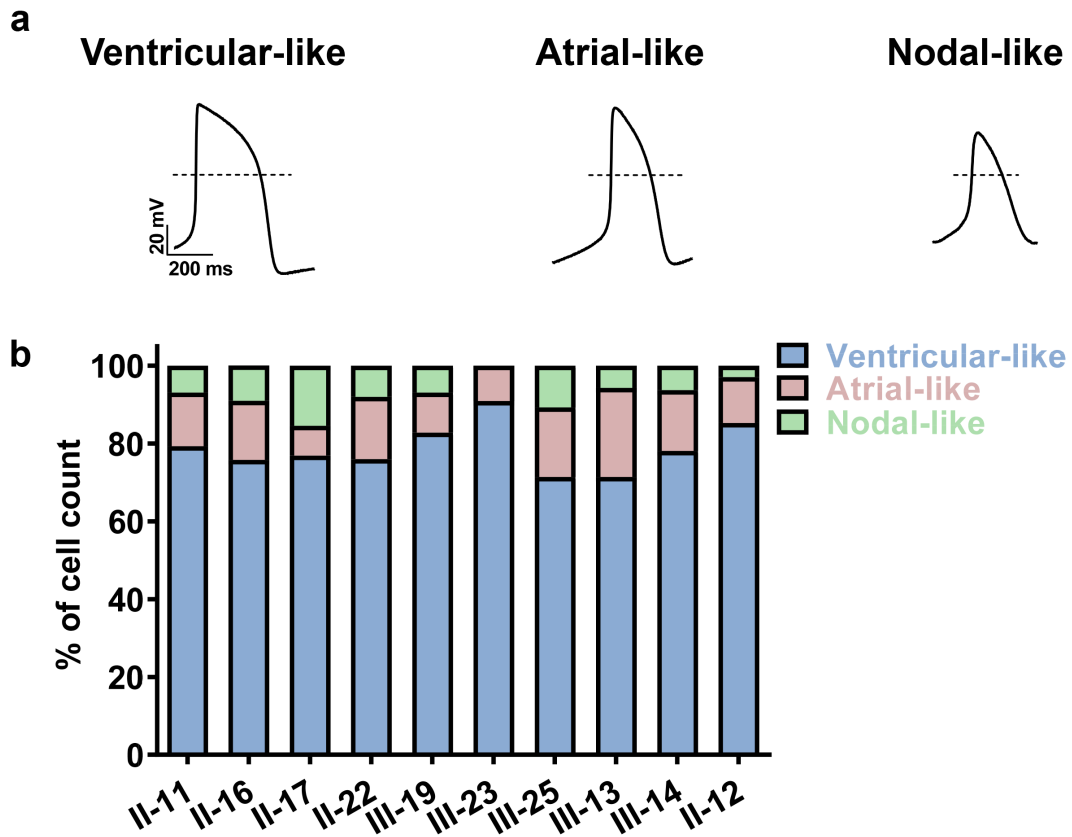

**Supplementary Figure 11. Analysis of myocyte subtypes derived from different iPSC lines. a.** Representative traces of ventricular-like, atrial-like, and nodal-like action potentials recorded from iPSC-CMs by single-cell patch clamp. **b.** Bar graph to show the percentages (%) of ventricular-like, atrial-like, and nodal-like iPSC-CMs in different groups.

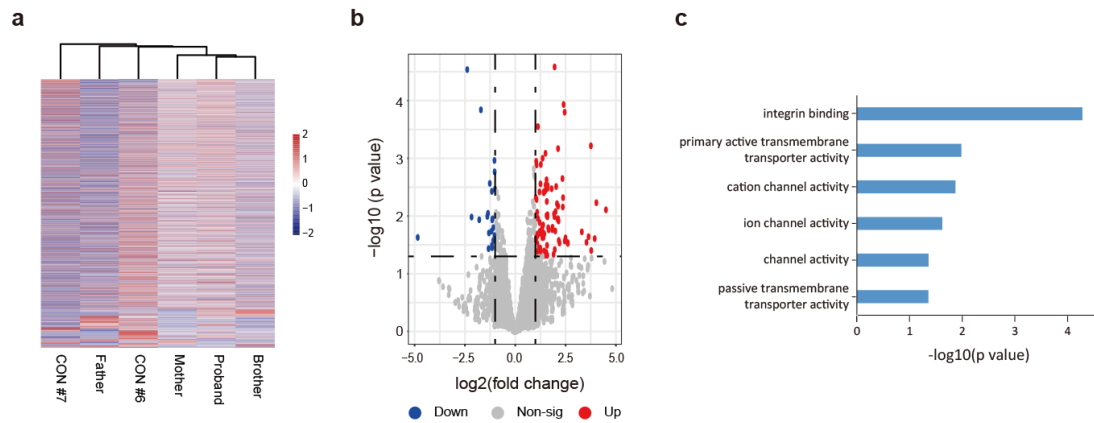

**Supplementary Figure 12. Transcriptomic comparison between control and BrS iPSC-CMs. a.** Hierarchical clustering based on global expression profile. **b.** Volcano plot showing the DEGs. Control (father, III-23, III-25) and BrS (proband, brother, mother) iPSC-CMs were compared. Up and down indicate genes that are upregulated and downregulated in BrS iPSC-CMs. **c.** GO terms that are enriched in DEGs.

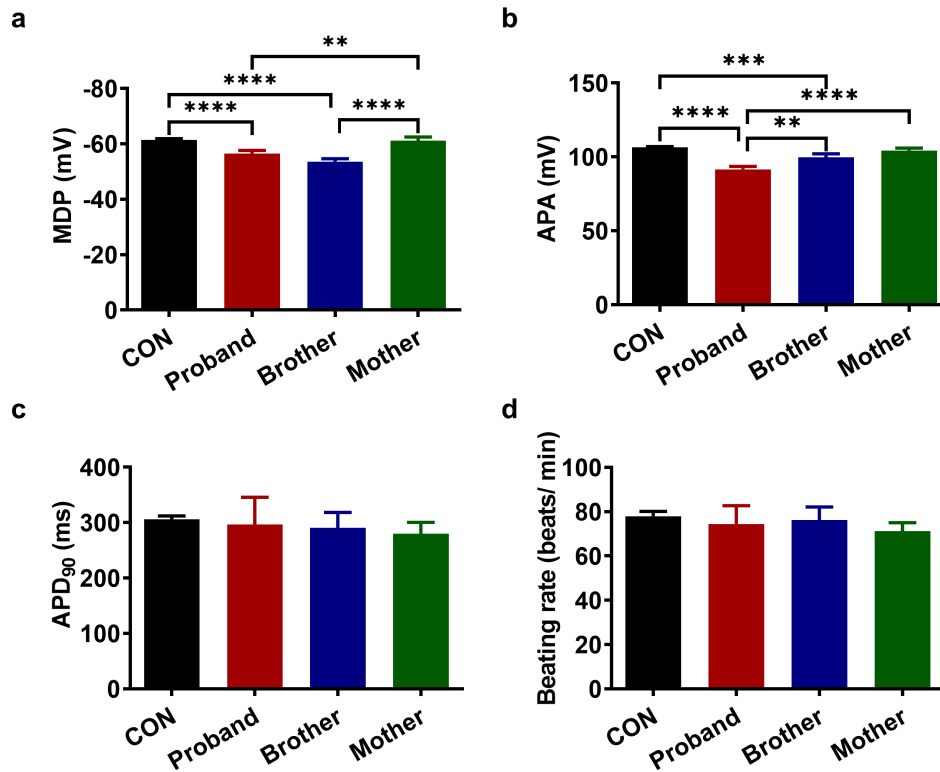

**Supplementary Figure 13. Comparison of action potential parameters between control and BrS iPSC-CMs. a-d.** Scatter plots to compare MDP, APA, APD<sub>90</sub> and beating rate between control and BrS (proband, brother and mother) iPSC-CMs by One-way ANOVA (Tukey method). The data collected from seven control iPSC-CMs were averaged and shown as “CON”. n= 20-138. \*\**P* < 0.01, \*\*\**P* < 0.001 and \*\*\*\**P* < 0.0001.

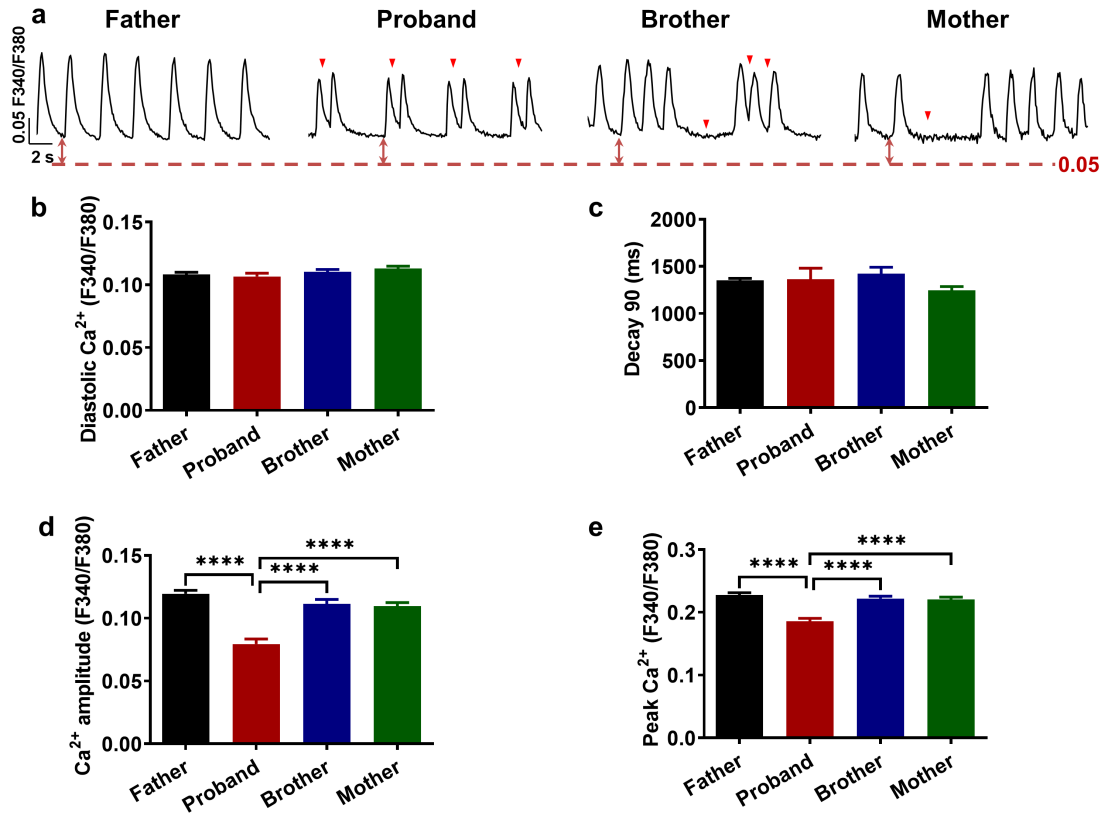

**Supplementary Figure 14. Irregular Ca<sup>2+</sup> signaling.** **a.** Representative Ca<sup>2+</sup> transient tracings recorded from father, proband, brother and mother iPSC-CMs. Arrhythmia-like abnormal Ca<sup>2+</sup> transient events are indicated by red arrows. Red dash line indicates 0.05 R<sub>340</sub>/R<sub>380</sub>. **b-d.** Bar graphs to compare the diastolic Ca<sup>2+</sup>, decay 90, Ca<sup>2+</sup> amplitude and peak Ca<sup>2+</sup> between father, proband, brother and mother iPSC-CMs by One-way ANOVA (Tukey method). n= 52-84. \*\*\*\**P*< 0.0001.

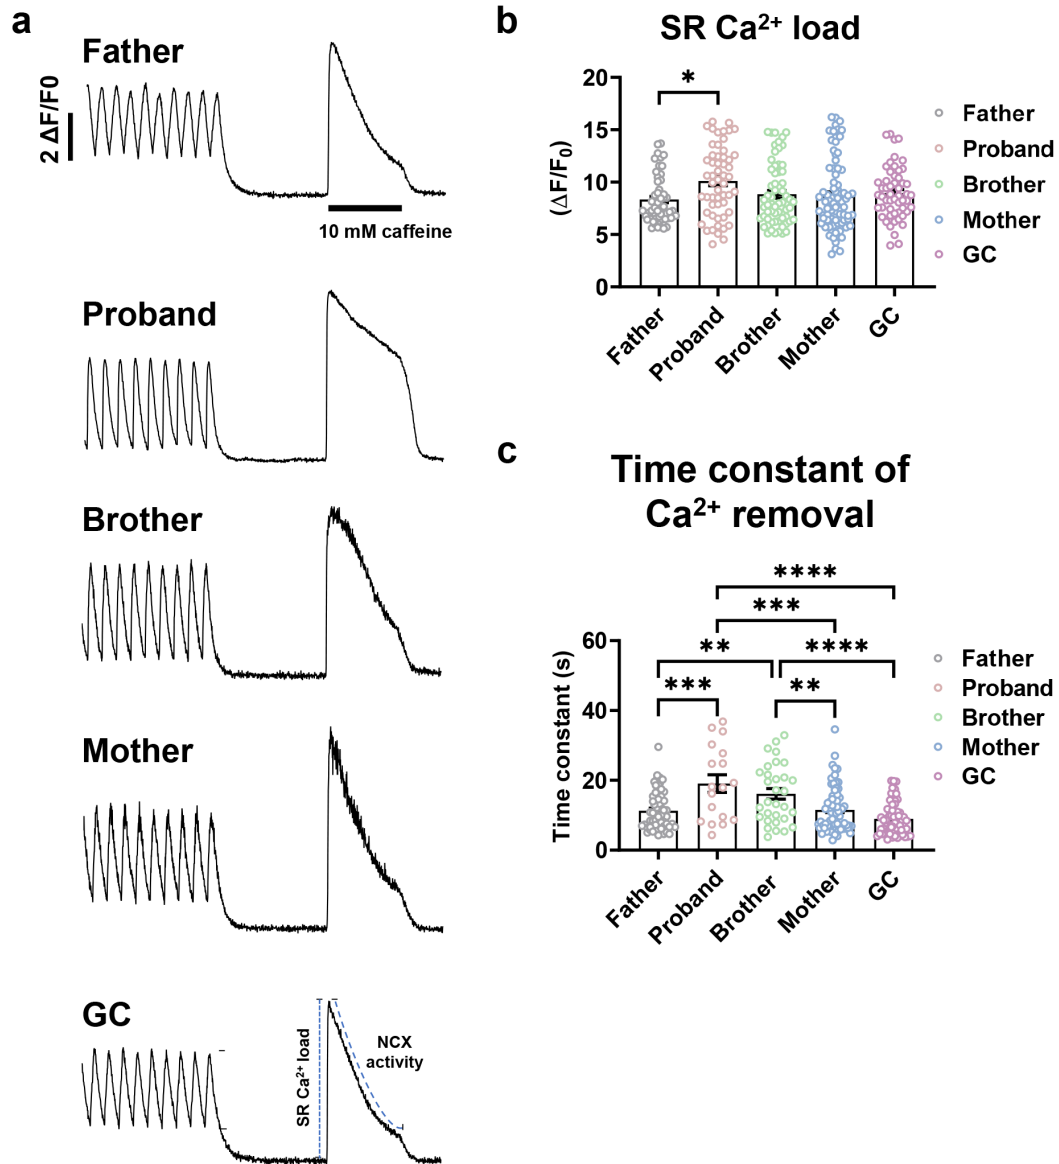

**Supplementary Figure 15. Assessment of SR  $\text{Ca}^{2+}$  load and NCX activity in different iPSC-CMs.** **a.** Representative  $\text{Ca}^{2+}$  transient tracings following stimulation with 10 mM caffeine in father, proband, brother, mother, and GC iPSC-CMs. **b.** Bar graph to compare the SR  $\text{Ca}^{2+}$  load between different groups by One-way ANOVA (Tukey method).  $n = 54-80$ . \* $P < 0.05$ . **c.** Bar graph to compare the time constant ( $\tau$ ) of  $\text{Ca}^{2+}$  removal between different groups by One-way ANOVA (Tukey method). NCX activity ( $1/\tau$ ) was calculated during caffeine application as the inverse of the rate of decrease of cytosolic  $\text{Ca}^{2+}$  ( $\tau$ ).  $n = 18-72$ . \*\* $P < 0.01$ , \*\*\* $P < 0.001$  and \*\*\*\* $P < 0.0001$ .

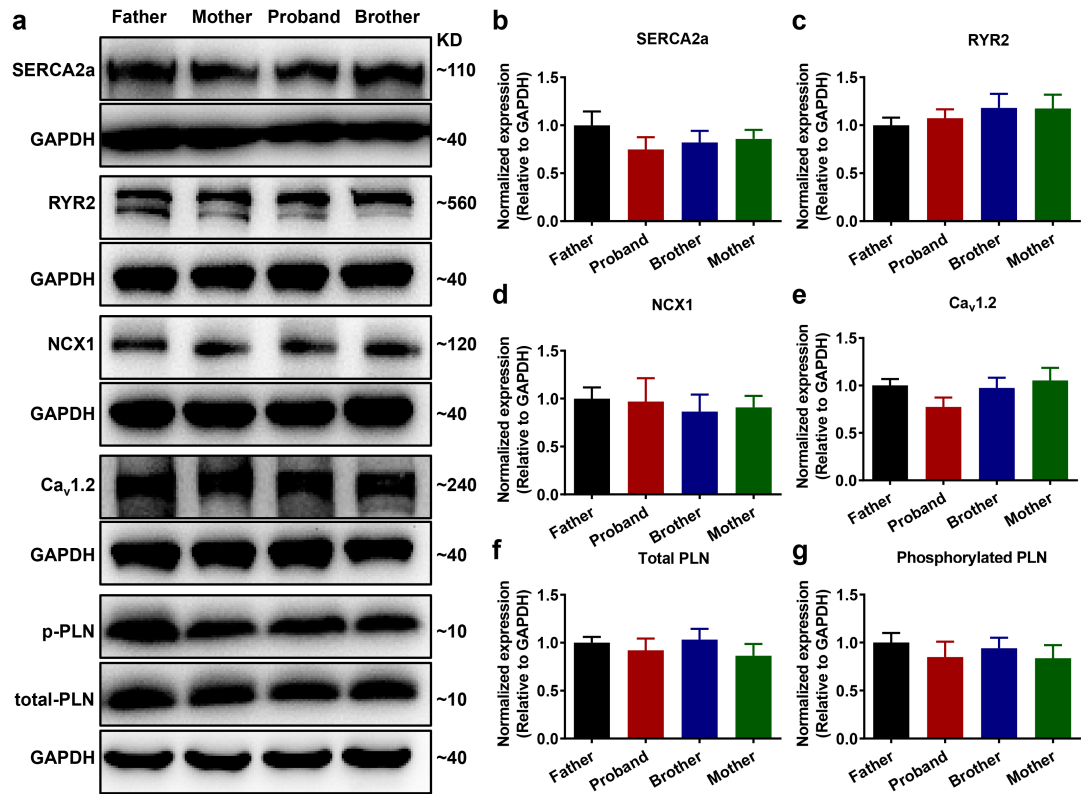

**Supplementary Figure 16. Comparable expression of key proteins in Ca<sup>2+</sup> signaling regulation between father, proband, brother and mother iPSC-CMs. a.** Western blot analysis of SERCA2a, RYR2, NCX1, Ca<sub>v</sub>1.2 and PLN between father, proband, brother and mother iPSC-CMs. GAPDH is used for the loading control. **b-g.** Scatter plots to compare the protein expression of SERCA2a, RYR2, NCX1, Ca<sub>v</sub>1.2 and PLN between different groups in a by One-way ANOVA (Tukey method). n = 7-19.



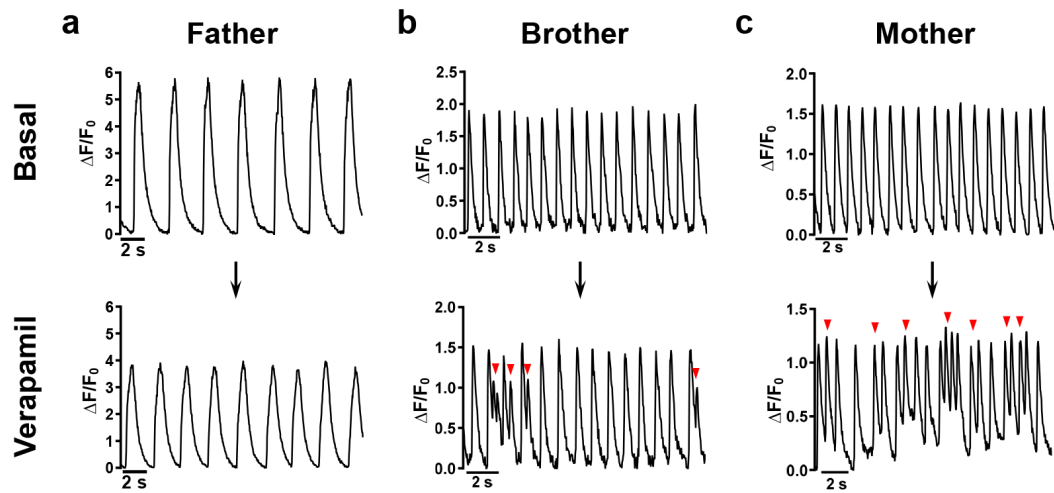

**Supplementary Figure 17. Verapamil test unmask the arrhythmic phenotype in brother and mother iPSC-CMs. a-c.** Representative  $\text{Ca}^{2+}$  transient tracings before and after 100 nM verapamil stress in father, brother or mother iPSC-CMs. Arrhythmia-like abnormal  $\text{Ca}^{2+}$  transient events are indicated by red arrows.

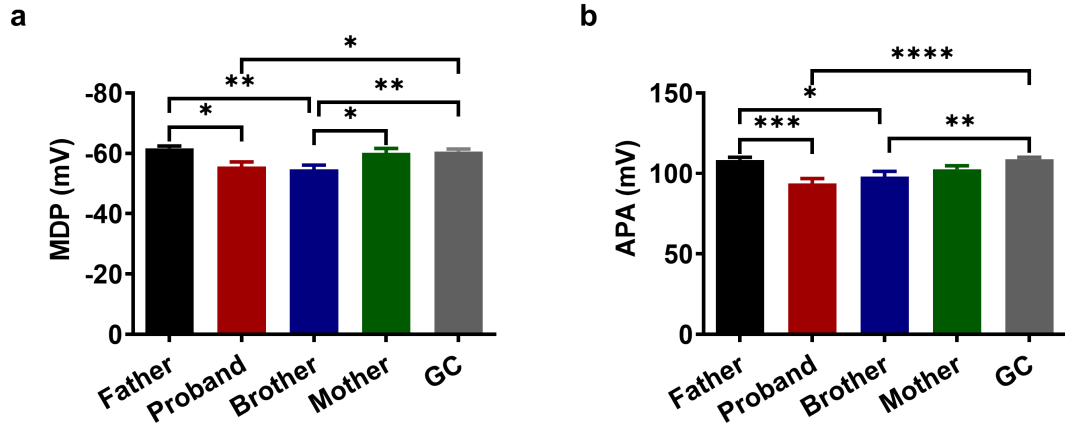

**Supplementary Figure 18. GC iPSC-CMs exhibited normal action potential profile. a-b.** Scatter plots to compare MDP and APA between father, proband, brother, mother and GC iPSC-CMs by One-way ANOVA (Tukey method).  $n= 12-37$ . \* $P < 0.05$ , \*\* $P < 0.01$ , \*\*\* $P < 0.001$  and \*\*\*\* $P < 0.0001$ .

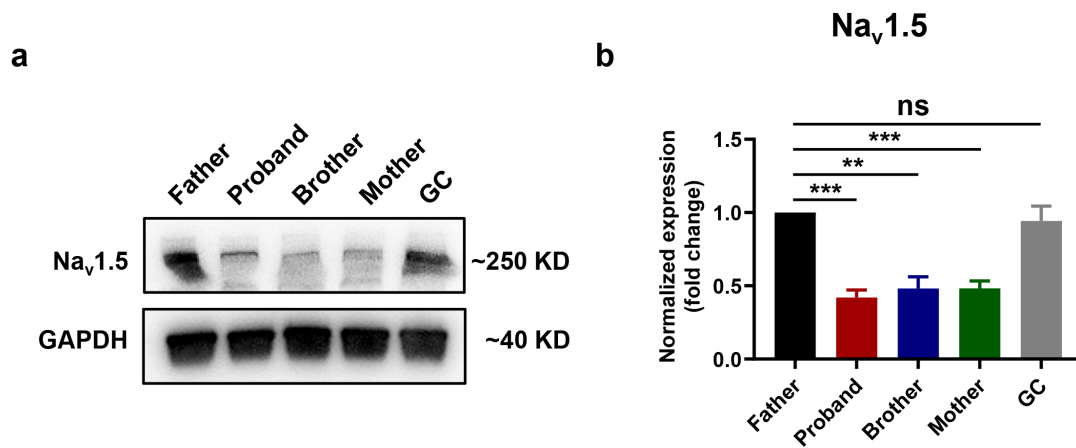

**Supplementary Figure 19. Correction of *SCN5A* D356Y in proband iPSC-CMs restores the protein expression of  $\text{Na}_v1.5$ .** **a.** Western blot analysis of  $\text{Na}_v1.5$  between father, proband, brother, mother and GC iPSC-CMs. GAPDH is used for the loading control. **b.** Bar graph to compare the protein expression of  $\text{Na}_v1.5$  between different groups by One-way ANOVA (Tukey method).  $n=3$ . \*\* $P < 0.01$  and \*\*\* $P < 0.001$ .

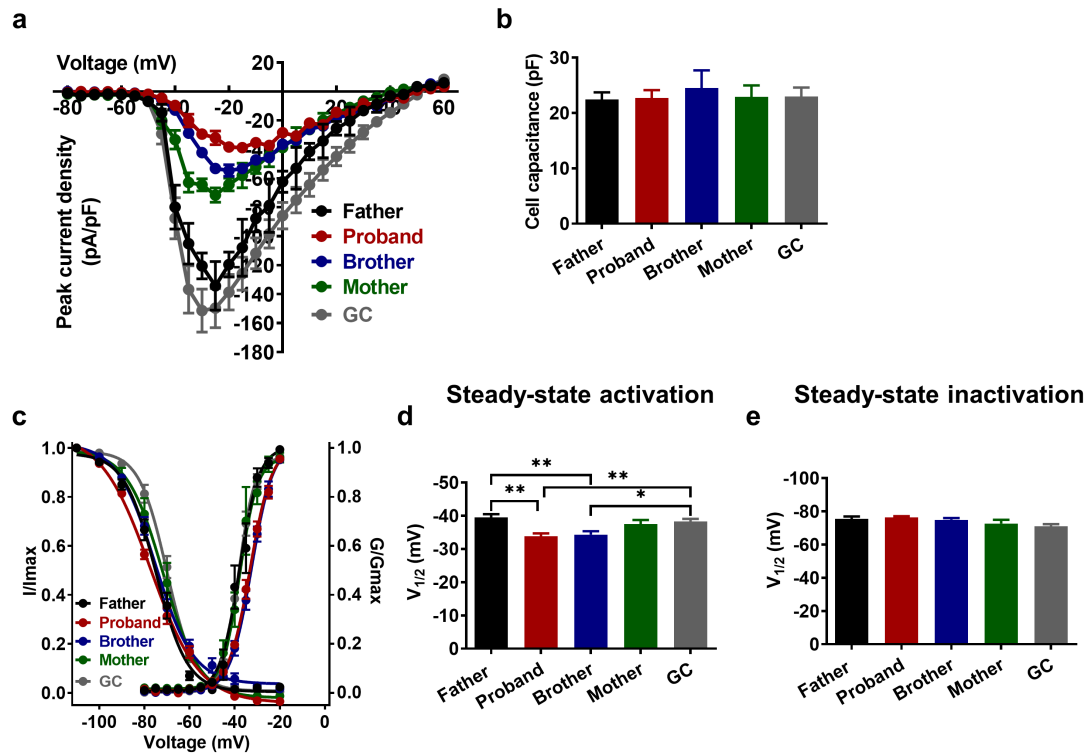

**Supplementary Figure 20. Correction of *SCN5A* D356Y in proband iPSC-CMs restored the Na<sup>+</sup> channel function.** **a.** Comparison of Na<sup>+</sup> IV curve between father, proband, brother, mother and GC iPSC-CMs. **b.** Bar graph to compare the cell capacitance between different groups in a by One-way ANOVA (Tukey method). n= 8-12. **c.** Comparison of steady-state activation and inactivation of Na<sup>+</sup> current between father, proband, brother, mother and GC iPSC-CMs. **d-e.** Bar graphs to compare the  $V_{1/2}$  of steady-state activation or inactivation between different groups in c by One-way ANOVA (Tukey method). n= 7-18. \* $P < 0.05$  and \*\* $P < 0.01$ .

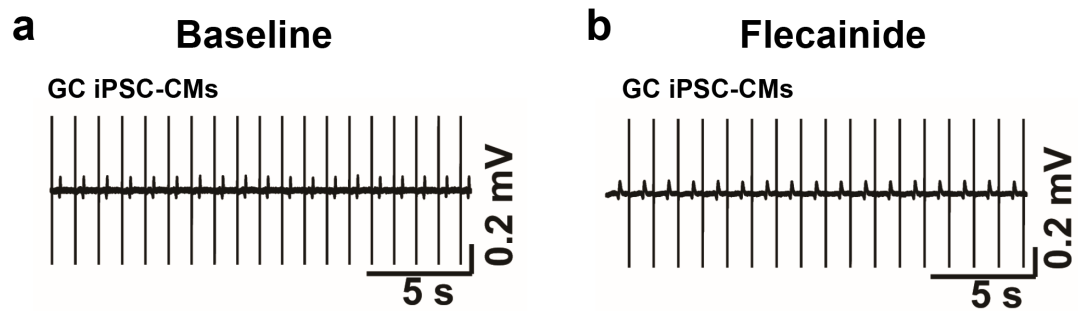

**Supplementary Figure 21. Flecainide test on GC iPSC-CMs by MEA. a-b.** Representative field potential tracings recorded from GC iPSC-CMs before and after acute treatment of 1  $\mu$ M flecainide.

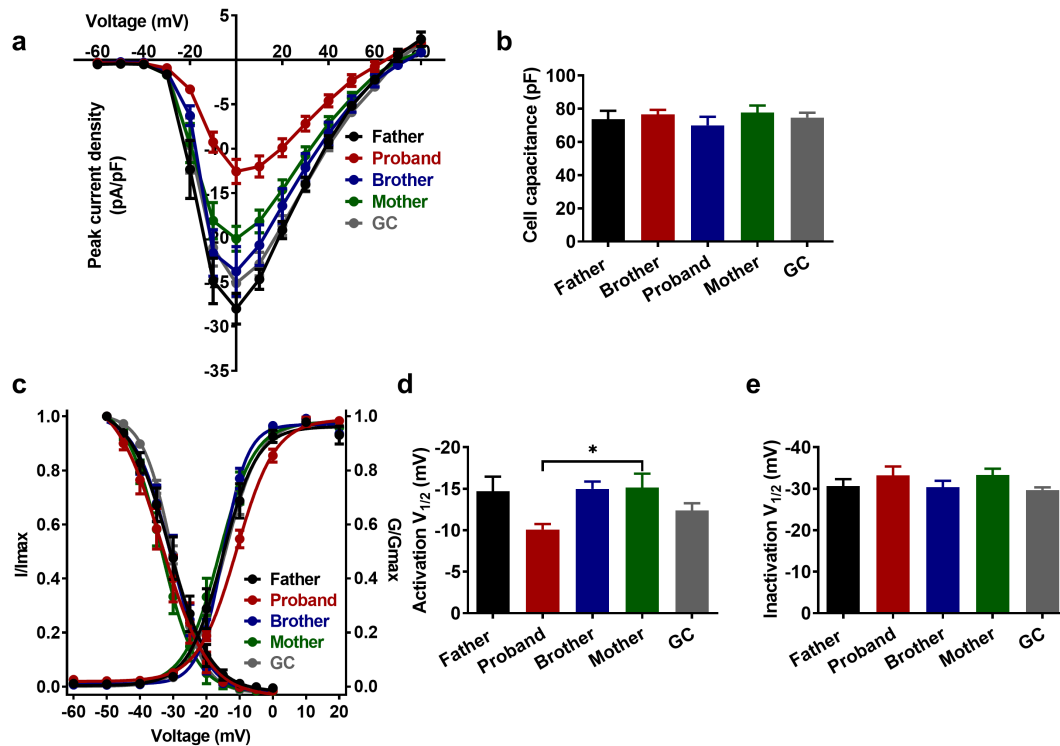

**Supplementary Figure 22. Correction of *SCN5A* D356Y in proband iPSC-CMs rescued the reduced Ca<sup>2+</sup> current phenotype.** **a.** Comparison of Ca<sup>2+</sup> IV curve between father, proband, brother, mother and GC iPSC-CMs. **b.** Bar graph to compare the cell capacitance between different groups in a by One-way ANOVA (Tukey method). n= 8-15. **c.** Comparison of steady-state activation and inactivation of Ca<sup>2+</sup> current between father, proband, brother, mother and GC iPSC-CMs. **d-e.** Bar graph to compare the V<sub>1/2</sub> of steady-state activation and inactivation between different groups in c by One-way ANOVA (Tukey method). n= 8-12. \* *P* < 0.05.

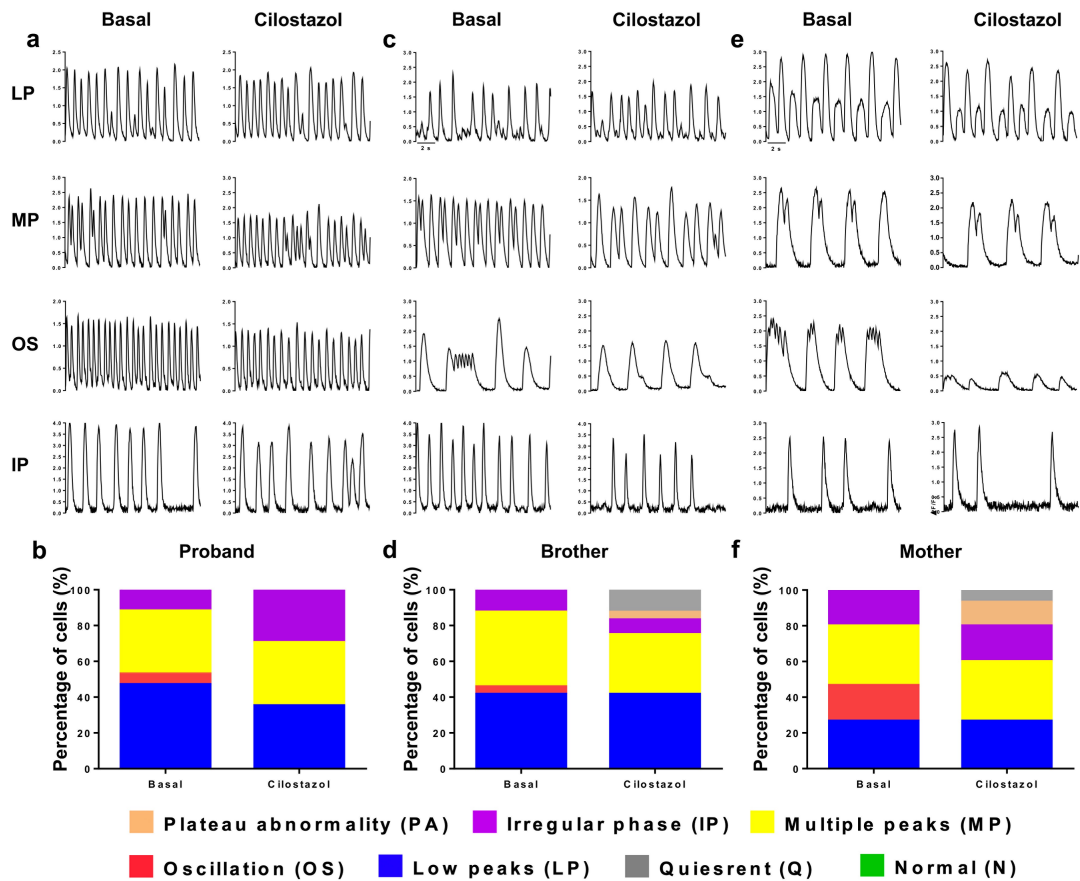

**Supplementary Figure 23. Cilostazol test in D356Y iPSC-CMs.** **a, c and e.** Representative  $\text{Ca}^{2+}$  transient tracings recorded from proband, brother and mother iPSC-CMs by  $\text{Ca}^{2+}$  imaging using Fluo-4 AM before and after 1  $\mu\text{M}$  cilostazol application. **b, d and f.** Bar graphs to compare percentage of cells exhibiting normal (N) or abnormal  $\text{Ca}^{2+}$  transient pattern including low peaks (LP), multiple peaks (MP), oscillation (OS) and irregular phase (IP). Plateau abnormality (PA) and quiescent (Q) before and after cilostazol application in proband, brother and mother iPSC-CMs.  $n=15-24$ .

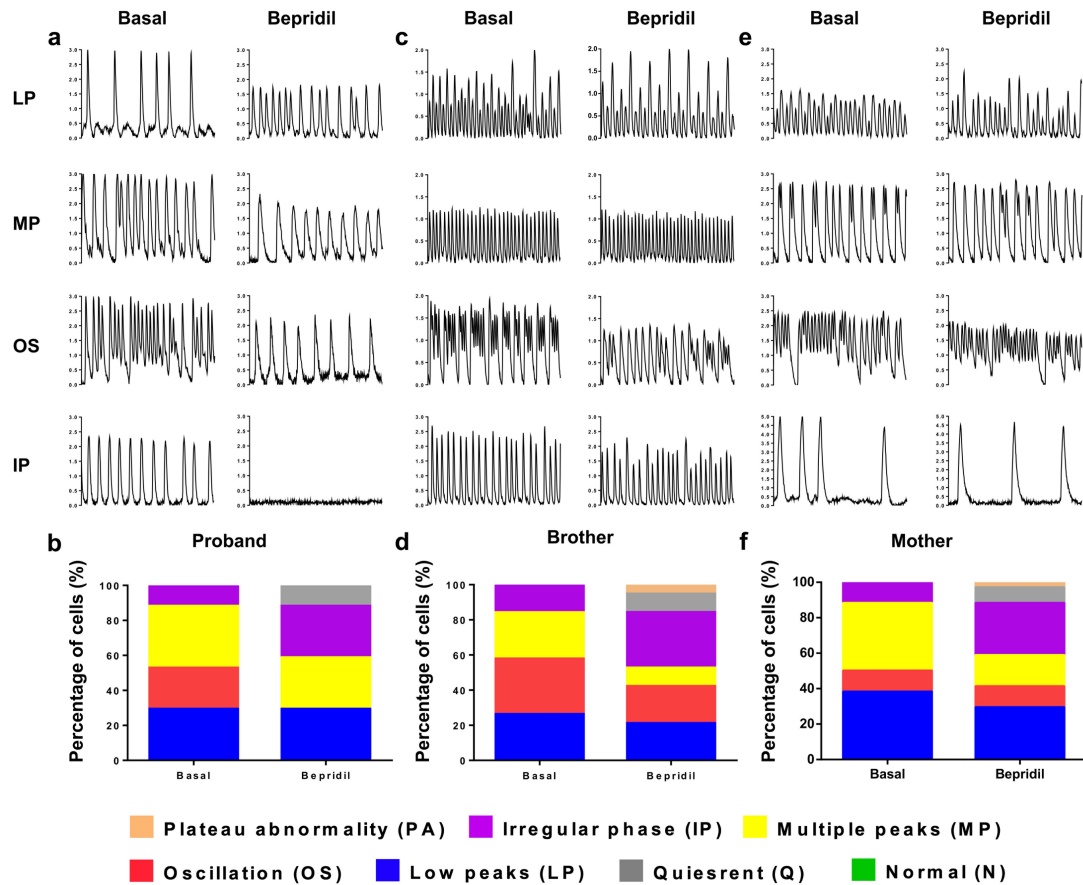

**Supplementary Figure 24. Bepridil test in D356Y iPSC-CMs.** **a, c and e.** Representative  $\text{Ca}^{2+}$  transient tracings recorded from proband, brother and mother iPSC-CMs by  $\text{Ca}^{2+}$  imaging using Fluo-4 AM before and after 100 nM bepridil application. **b, d and f.** Bar graphs to compare percentage of cells exhibiting normal (N) or abnormal  $\text{Ca}^{2+}$  transient pattern including low peaks (LP), multiple peaks (MP), oscillation (OS) and irregular phase (IP). Plateau abnormality (PA) and quiescent (Q) before and after bepridil application in proband, brother and mother iPSC-CMs. n= 17-34.



### Before Ca<sup>2+</sup>

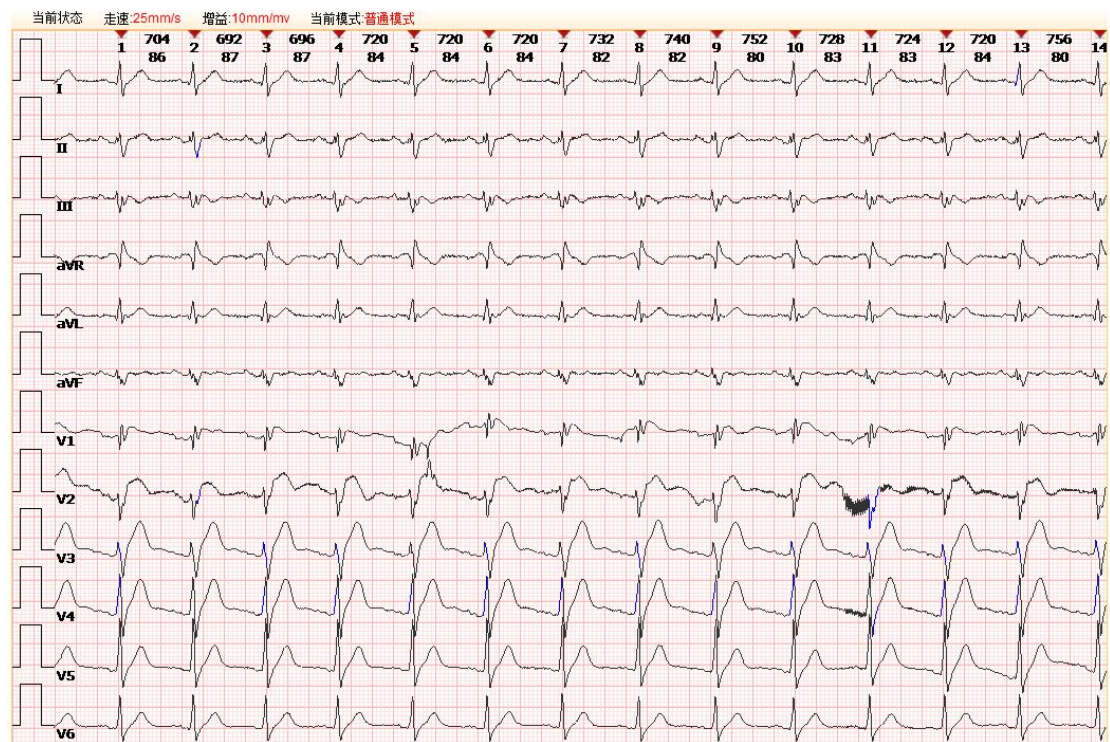

### Post Ca<sup>2+</sup>

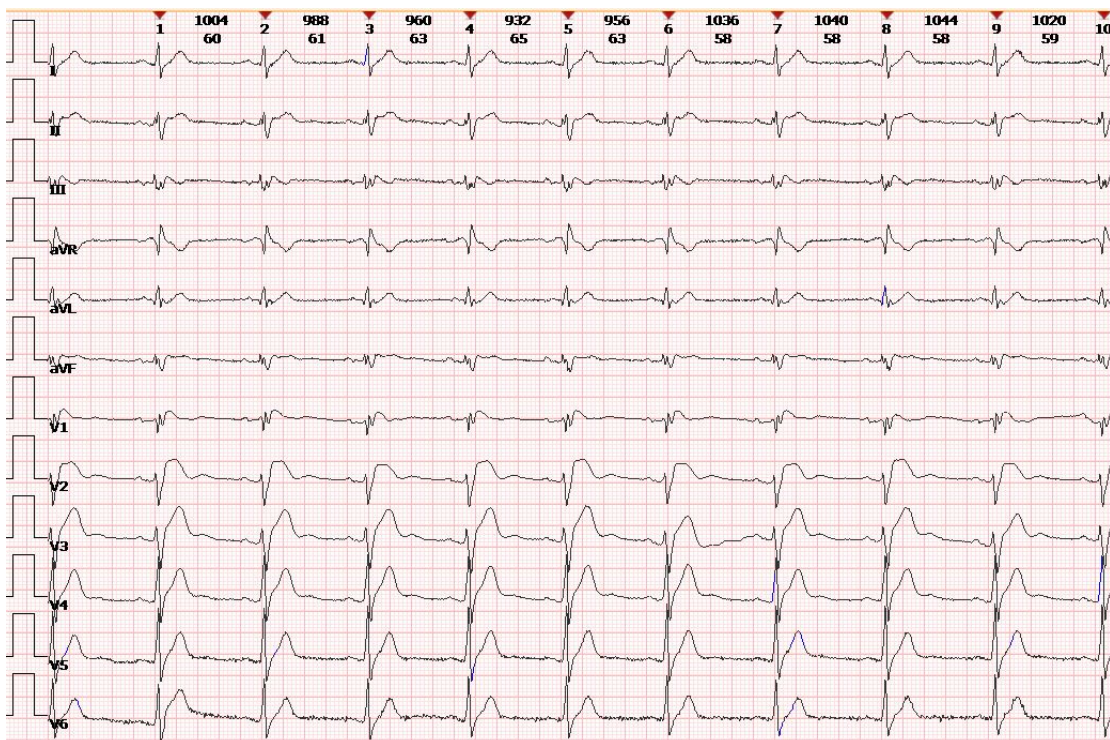

Supplementary Figure 25. The full tracings of regular ECG before and immediately after the application of intravenous calcium.

## Before Ca<sup>2+</sup>

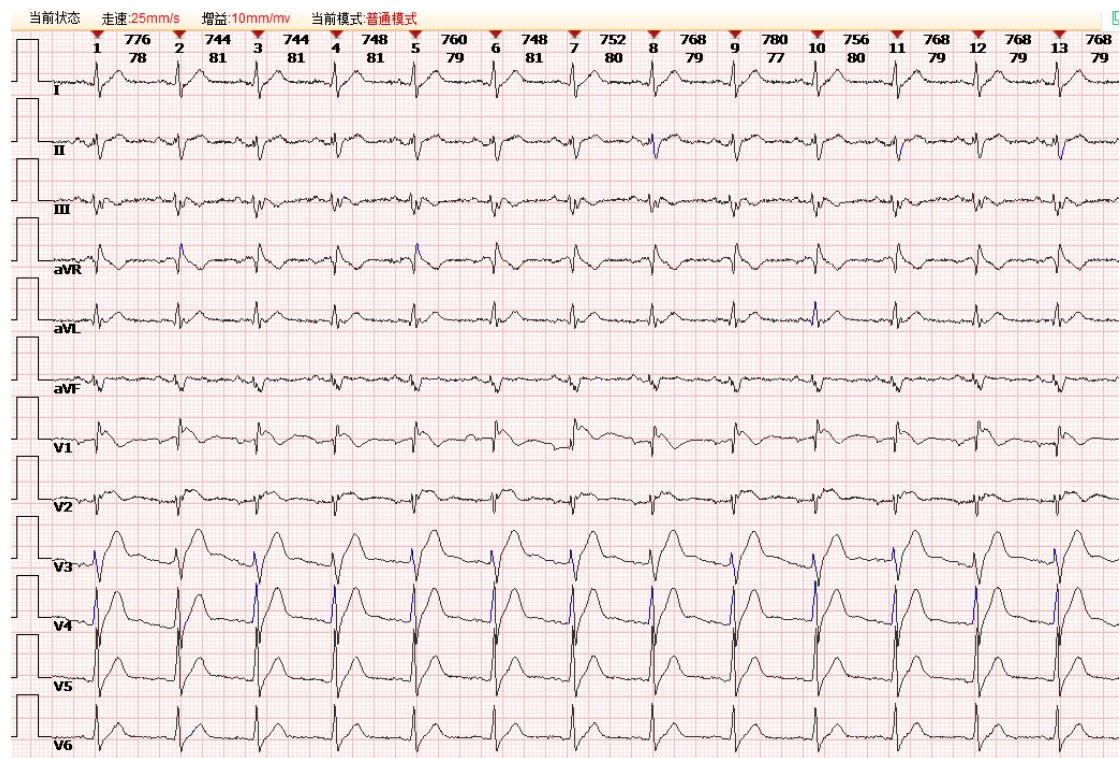

## Post Ca<sup>2+</sup>

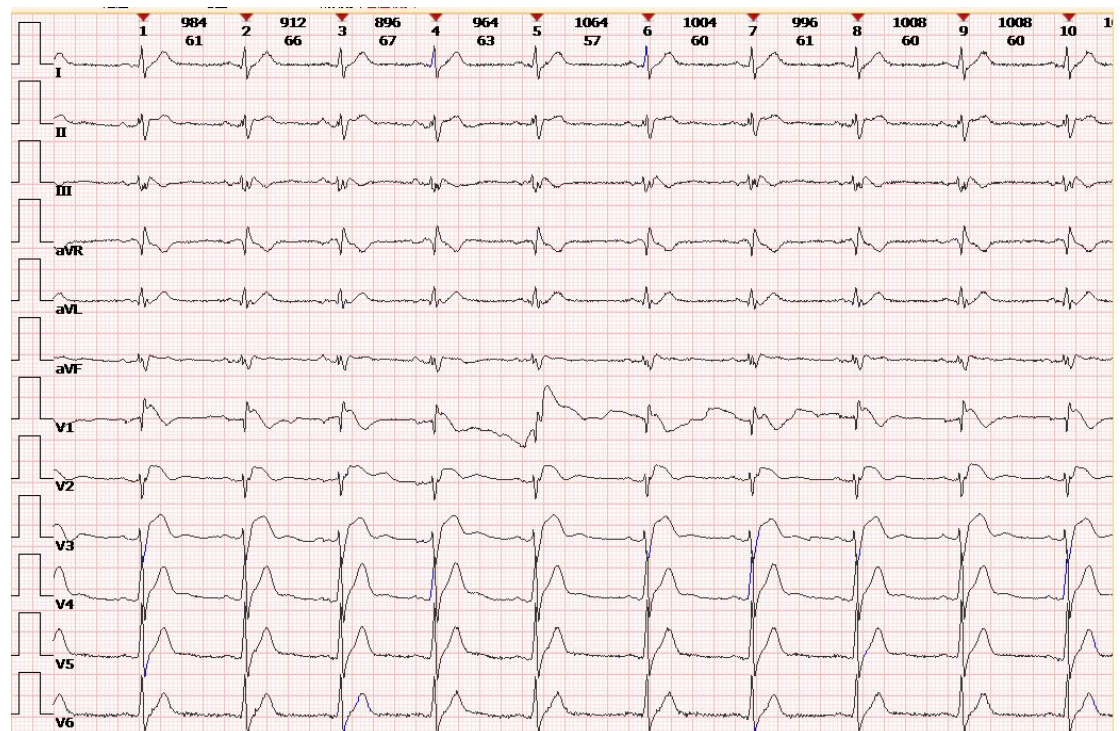

Supplementary Figure 26. The full tracings of the third ICS ECG before and immediately after the application of intravenous calcium.

**Supplementary Table 1. Clinical information of BrS patients in this study**

|                                        | Proband                  | Brother      | Mother       |
|----------------------------------------|--------------------------|--------------|--------------|
| Age at presentation                    | 34                       | 31           | 53           |
| Sex                                    | M                        | M            | F            |
| Age of diagnosis                       | 22                       | 26           | 49           |
| History of syncope or SCA              | Yes                      | No           | No           |
| Age of first syncopal episode or SCA   | 21                       | NA           | NA           |
| Family history of SD                   | Yes                      | Yes          | Yes          |
| Deaf-mutism                            | No                       | No           | No           |
| Spontaneous type 1 Brugada pattern ECG | Yes                      | Yes          | No           |
| QTc of surface ECG (ms)                | 391                      | 397          | 432          |
| ICD implantation                       | Yes                      | No           | No           |
| VT/VF ablation                         | Yes                      | No           | No           |
| VF/VT inducibility during the EPS      | S1S1 270ms RVOT,<br>PMVT | NA           | NA           |
| Putative causal genetic site           | <i>SCN5A</i>             | <i>SCN5A</i> | <i>SCN5A</i> |
| Mutation type                          | Inherited                | Inherited    | NA           |

SCA: sudden cardiac arrest; SD: sudden death; ECG: electrocardiograph; ICD: implantable cardioverter defibrillator; VT: ventricular tachycardia; VF: ventricular fibrillation; EPS: electrophysiology study; RVOT: right ventricular outflow tract; PMVT: polymorphic ventricular tachycardia

**Supplementary Table 2. Summary of control and BrS iPSC lines in this study**

|                                          | <b>Age</b> | <b>Sex</b> | <b>Ethnicity</b> | <b>Somatic cells</b> | <b>Reprogramming method</b> | <b>iPSC lines established</b> |
|------------------------------------------|------------|------------|------------------|----------------------|-----------------------------|-------------------------------|
| <b>CON#1 (proband's father, II-11)</b>   | 52         | Male       | Chinese Han      | Skin fibroblasts     | Sendai virus                | Clone #7, #12 and #16         |
| <b>CON#2 (II-16)</b>                     | 55         | Female     | Chinese Han      | Skin fibroblasts     | Sendai virus                | Clone #5, #6 and #9           |
| <b>CON#3 (II-17)</b>                     | 53         | Female     | Chinese Han      | Skin fibroblasts     | Sendai virus                | Clone #1, #2 and #3           |
| <b>CON#4 (II-22)</b>                     | 47         | Male       | Chinese Han      | Skin fibroblasts     | Sendai virus                | Clone #2, #3 and #8           |
| <b>CON#5 (III-19)</b>                    | 35         | Female     | Chinese Han      | Skin fibroblasts     | Sendai virus                | Clone #3, #8 and #10          |
| <b>CON#6 (III-23)</b>                    | 33         | Female     | Chinese Han      | Skin fibroblasts     | Sendai virus                | Clone #2, #3 and #8           |
| <b>CON#7 (III-25)</b>                    | 21         | Female     | Chinese Han      | Skin fibroblasts     | Sendai virus                | Clone #2 and #8               |
| <b>BrS#1 (proband, III-13)</b>           | 29         | Male       | Chinese Han      | Skin fibroblasts     | Sendai virus                | Clone #3 and #13              |
| <b>BrS#2 (proband's brother, III-14)</b> | 26         | Male       | Chinese Han      | Skin fibroblasts     | Sendai virus                | Clone #4 and #9               |
| <b>BrS#3 (proband's mother, II-12)</b>   | 48         | Female     | Chinese Han      | Skin fibroblasts     | Sendai virus                | Clone #8 and #12              |

**Supplementary Table 3. Summary of action potential parameters in control and BrS iPSC-CMs**

|              | <b>MDP</b>    | <b>APA</b>    | <b>APD<sub>90</sub></b> | <b>V<sub>max</sub></b> | <b>Beating rate</b> |
|--------------|---------------|---------------|-------------------------|------------------------|---------------------|
|              | <b>(mV)</b>   | <b>(mV)</b>   | <b>(ms)</b>             | <b>(V/s)</b>           | <b>(beats/min)</b>  |
| <b>CON#1</b> | -61.66 ± 0.99 | 106.20 ± 1.30 | 314.70 ± 17.33          | 14.81 ± 1.70           | 80.67 ± 8.36        |
| <b>CON#2</b> | -58.97 ± 1.24 | 101.70 ± 1.58 | 297.60 ± 16.12          | 12.40 ± 0.98           | 78.67 ± 4.95        |
| <b>CON#3</b> | -63.46 ± 1.02 | 106.30 ± 1.78 | 283.20 ± 13.98          | 12.99 ± 0.95           | 72.59 ± 6.30        |
| <b>CON#4</b> | -60.59 ± 0.88 | 104.00 ± 0.77 | 311.10 ± 19.05          | 12.06 ± 1.16           | 75.73 ± 4.84        |
| <b>CON#5</b> | -61.22 ± 1.10 | 103.70 ± 1.00 | 275.40 ± 15.07          | 12.87 ± 1.23           | 88.38 ± 4.62        |
| <b>CON#6</b> | -63.60 ± 0.7  | 111.90 ± 0.81 | 311.90 ± 1.70           | 12.58 ± 0.81           | 76.61 ± 3.78        |
| <b>CON#7</b> | -60.88 ± 0.80 | 108.20 ± 1.35 | 336.60 ± 15.34          | 13.00 ± 1.04           | 74.03 ± 6.01        |
| <b>BrS#1</b> | -56.53 ± 1.13 | 91.55 ± 2.04  | 296.50 ± 49.42          | 8.07 ± 0.77            | 74.43 ± 8.30        |
| <b>BrS#2</b> | -53.57 ± 1.08 | 96.67 ± 2.37  | 290.60 ± 28.09          | 9.88 ± 0.63            | 76.23 ± 5.93        |
| <b>BrS#3</b> | -61.19 ± 1.30 | 103.8 ± 1.78  | 279.90 ± 20.43          | 9.63 ± 0.46            | 71.17 ± 3.90        |

**Supplementary Table 4. Summary of sodium current parameters in control and BrS iPSC-CMs**

|              | Peak current density at -30 mV | Cell capacitance | <u>Steady-state activation</u> |                | <u>Steady-state inactivation</u> |                |
|--------------|--------------------------------|------------------|--------------------------------|----------------|----------------------------------|----------------|
|              | (pA/pF)                        |                  | (pF)                           | $V_{1/2}$ (mV) | $k$ (mV/e-fold)                  | $V_{1/2}$ (mV) |
| <b>CON#1</b> | -141.23 ± 13.63                | 22.85 ± 0.78     | -40.43 ± 0.98                  | 2.88 ± 0.28    | -77.64 ± 0.81                    | 6.21 ± 0.096   |
| <b>CON#2</b> | -129.51 ± 10.74                | 25.40 ± 2.08     | -38.17 ± 1.02                  | 2.88 ± 0.16    | -80.02 ± 0.64                    | 6.61 ± 0.21    |
| <b>CON#3</b> | -141.57 ± 12.04                | 26.22 ± 1.89     | -42.27 ± 1.36                  | 2.40 ± 0.44    | -74.82 ± 1.61                    | 6.42 ± 0.19    |
| <b>CON#4</b> | -117.93 ± 7.97                 | 24.14 ± 1.85     | -40.15 ± 1.18                  | 2.47 ± 0.36    | -77.78 ± 1.12                    | 6.52 ± 0.21    |
| <b>CON#5</b> | -117.99 ± 6.04                 | 20.86 ± 1.74     | -41.73 ± 1.10                  | 2.43 ± 0.24    | -77.03 ± 0.78                    | 6.34 ± 0.23    |
| <b>CON#6</b> | -125.46 ± 8.86                 | 21.40 ± 1.65     | -41.78 ± 1.50                  | 2.33 ± 0.23    | -74.39 ± 1.36                    | 7.20 ± 0.25    |
| <b>CON#7</b> | -131.46 ± 11.74                | 24.76 ± 2.06     | -40.98 ± 1.30                  | 2.90 ± 0.26    | -79.66 ± 0.86                    | 6.64 ± 0.30    |
| <b>BrS#1</b> | -33.92 ± 3.16                  | 26.38 ± 1.15     | -33.79 ± 0.75                  | 4.07 ± 0.16    | -74.40 ± 1.65                    | 9.86 ± 0.86    |
| <b>BrS#2</b> | -48.45 ± 4.38                  | 23.87 ± 1.52     | -35.24 ± 0.92                  | 3.98 ± 0.16    | -76.22 ± 1.41                    | 8.42 ± 0.90    |
| <b>BrS#3</b> | -70.61 ± 3.19                  | 24.47 ± 1.31     | -39.05 ± 0.94                  | 3.52 ± 0.23    | -76.59 ± 0.89                    | 7.63 ± 0.23    |

**Supplementary Table 5. Summary of Ca<sup>2+</sup> transient parameters in control and BrS iPSC-CMs**

|                | <b>Diastolic Ca<sup>2+</sup></b> | <b>Transient amplitude</b> | <b>Peak Ca<sup>2+</sup></b> | <b>Maximal rising rate</b> | <b>Decay 90</b> |
|----------------|----------------------------------|----------------------------|-----------------------------|----------------------------|-----------------|
|                | <b>(F340/F380)</b>               | <b>(F340/F380)</b>         | <b>(F340/F380)</b>          | <b>(F340/F380/s)</b>       | <b>(ms)</b>     |
| <b>Father</b>  | 0.108 ± 0.002                    | 0.119 ± 0.003              | 0.228 ± 0.004               | 0.424 ± 0.010              | 1351 ± 21.91    |
| <b>Proband</b> | 0.106 ± 0.002                    | 0.079 ± 0.004              | 0.186 ± 0.004               | 0.302 ± 0.017              | 1364 ± 116.8    |
| <b>Brother</b> | 0.110 ± 0.000                    | 0.114 ± 0.003              | 0.222 ± 0.004               | 0.348 ± 0.011              | 1422 ± 68.17    |
| <b>Mother</b>  | 0.113 ± 0.002                    | 0.109 ± 0.003              | 0.220 ± 0.004               | 0.381 ± 0.010              | 1246 ± 40.11    |

**Supplementary Table 6. Summary of calcium current parameters in control and BrS iPSC-CMs**

|                | <b>Peak current density<br/>At 0 mV</b> | <b>Cell capacitance</b> | <b><u>Steady-state activation</u></b> |                 | <b><u>Steady-state inactivation</u></b> |                 |
|----------------|-----------------------------------------|-------------------------|---------------------------------------|-----------------|-----------------------------------------|-----------------|
|                | (pA/pF)                                 | (pF)                    | $V_{1/2}$ (mV)                        | $k$ (mV)        | $V_{1/2}$ (mV)                          | $k$ (mV)        |
| <b>Father</b>  | $-29.63 \pm 1.83$                       | $63.30 \pm 2.93$        | $-14.26 \pm 1.49$                     | $4.40 \pm 0.32$ | $-29.16 \pm 1.50$                       | $5.04 \pm 0.24$ |
| <b>Proband</b> | $-14.08 \pm 1.41$                       | $58.59 \pm 4.26$        | $-11.32 \pm 1.43$                     | $6.67 \pm 0.47$ | $-32.96 \pm 2.66$                       | $7.65 \pm 0.77$ |
| <b>Brother</b> | $-27.81 \pm 1.64$                       | $56.73 \pm 4.19$        | $-14.85 \pm 0.96$                     | $4.05 \pm 0.21$ | $-27.56 \pm 1.46$                       | $5.87 \pm 0.37$ |
| <b>Mother</b>  | $-22.98 \pm 1.82$                       | $60.68 \pm 4.54$        | $-14.79 \pm 1.45$                     | $4.18 \pm 0.37$ | $-30.56 \pm 1.46$                       | $4.83 \pm 0.17$ |
